# Supplementary material for: Sensory determinants of the autonomous sensory meridian response (ASMR): understanding the triggers
Source: PeerJ. 2017 Oct 6;5:e3846. doi: 10.7717/peerj.3846 (PMC5633022; doi:10.7717/peerj.3846)
Supplement: Supplemental Information 2 — The data here have been cleaned (incomplete responses removed) and anonymised. We also include marginal calculations for the benefit of the reviewers. [file peerj-05-3846-s002.xlsx]

## Sheet: Determinants of the Autonomous 
			Demographic info								Hosted ASMR																													Non-hosted/Abstract ASMR videos
Progress	Duration (in seconds)	Finished	Q6	Q7	Q7_6_TEXT	Q8	Q11	Q12	Q13	Q13	Q16	Q17	Q18	Q19	Q20	Q21	Q22_1	Q22_2	Q22_3	Q22_4	Q22_5	Q22_6	Q22_7	Q23	Q25_1	Q25_2	Q25_3	Q25_4	Q25_5	Q25_6	Q25_7	Q25_8	Q42	Q26	Q27	Q28	Q29		Q30	Q33	Q34	Q35	Q36	Q37	Q39	Q46	Q47_1	Q47_2	Q47_3
Progress	Duration (in seconds)	Finished	Age	Gender choice	Gender text	Country of residence	Do you experience ASMR?	Do you specifically search for and watch ASMR videos online?	Do you specifically search for and listen to ASMR audios?	Do you experience Misophonia?	Is the video narrated? For this section, please recall one of your favourite ASMR videos that is hosted by a person/ASMRtist. Feel free to be as detailed as you like in your answers. Is the video narrated?	Where is the video set?	Is the setting private or public?	Does the video contain roleplay, or a simulated situation (e.g. a haircut)?	Is the video focused on an object?	Briefly describe the contents of the video (e.g. "The host gives the viewer a haircut")	Please rate the appearance of the physical environment - Clean	Please rate the appearance of the physical environment - Intricate	Please rate the appearance of the physical environment - Welcoming	Please rate the appearance of the physical environment - Untidy	Please rate the appearance of the physical environment - Bright colours	Please rate the appearance of the physical environment - Warm-looking	Please rate the appearance of the physical environment - Modern	Please briefly describe the physical setting of the video	How would you rate the atmosphere of the video? - Happy	How would you rate the atmosphere of the video? - Inviting	How would you rate the atmosphere of the video? - Clinical	How would you rate the atmosphere of the video? - Organised	How would you rate the atmosphere of the video? - Relaxed	How would you rate the atmosphere of the video? - Predicatable	How would you rate the atmosphere of the video? - Scripted	How would you rate the atmosphere of the video? - Dangerous	Does the video have a solid colour background?	What do you think makes this video most effective in helping you achieve ASMR? What makes it stand out above other ASMR videos?	When watching ASMR videos, how many triggers do you feel comfortable focusing on at one time?	Approximately how long, in minutes, is the whole video?	Approximately how long, in minutes, does the video spend focusing on each trigger?	Trigger Time Range Codes	Is there anything else about this video that you would like us to know?	Is the video narrated?	Where is the video set?	Is the setting private or public?	Does the video contain roleplay, or a simulated situation (e.g. a haircut)?	Is the video focused on an object?	Please briefly describe the contents of this video (e.g. "Waves crashing on the shore")	Does the video have a solid colour background?	How would you rate the atmosphere of the video? - Happy	How would you rate the atmosphere of the video? - Inviting	How would you rate the atmosphere of the video? - Clinical
100	2072	1	25	7		England	1	1	2	1	1	1	1	2	1	The host makes candles and narrates it	1	1	2	7	5	1	4	A softly lit room with fairy light (bokeh) in the background	2	2	7	4	1	4	5	7	4	The soft methodical narrating of the process, the soft light and gentle noises (I.e wax dripping, stirring)	2	30 minutes	30	4		2	1	1	2	1	Hairbrushing without narration	2	3	2	5
100	1930	1	25	6	Demisexual Biromantic trans woman and these categories are very poorly designed.	USA	1	3	3	1	2	1	1	1	1	Can't remember the specific one	1	6	2	7	3	3	3	At a table in a living room or kitchen	4	2	5	3	2	3	2	7	1	Empathic response to experiences of people in video.	1	10	0.5	1		2	2	1	1	2	Walking through the woods on crunchy leaves	4	1	1	7
100	7846	1	25	7		Greece	1	1	2	2	1	1	2	1	2	Physical examination	1	2	1	7	3	1	2	Physiotherapist's clinic (roleplay).	1	1	2	1	1	2	3	7	3	I prefer hearing a soft voice, not whispering, so this video is the right one for me.	2	15	2	1		2	1	2	2	2	Fire crackling sound	2	2	2	7
100	1704	1	25	7		USA	1	1	3	2	1	1	1	2	2	The host explains Chinese paintbrushes, various tea flavors, gives life advice, and tells stories about her childhood.	4	4	4	3	4	3	4	Usually footage of her desk with a teapot and teacup or art supplies. She might be drawing or painting.	2	4	6	4	1	6	7	7	4	There's no background noise so you can hear her voice more clearly, it's usually night time so she is talking softly so she doesn't wake anyone up, and the video is over 45 minutes long and I haven't heard it awhile.	2	55 minutes	N/A - this video is intermixed with triggers at random			1	1	2	2	1	Giving a tour of a museum.	4	2	2	2
100	13349	1	25	7		Germany	1	1	2	1	1	1	1	1	1	The host shows viewer different items	2	4	2	6	5	3	3	Tidy, simple and ratet steril	4	2	2	2	3	2	2	6	3	The Gentleman movements and voice of the host	2	18	3	1		2	1	1	1	2	Animals being groomed	1	1	2	4
100	665	1	25	1		Germany	1	2	3	2	2	1	1	2	1	Plastic foil on a mic getting touched.	1	4	4	7	4	4	3	Women touching plastic foil on a mic.	3	3	6	6	4	4	4	7	4	High pitched noises.	2	7	7	2
100	1178	1	25	6	Bi	USA	1	1	2	2	1	1	1	1	2	Host is dentist doing teeth cleaning	1	1	4	7	6	6	1	Dentists office - cold lights and modern look but still relaxing to me for some reason	4	4	1	1	6	5	1	5	4	I love clinical videos for some reason, because they're scripted and organized and "clean" like you said above. I find clinical noises (scraping, picking, cutting, mechanical) super relaxing	2	20	2 - 3 mins	1	I don't find clinical settings relaxing at all in real life, but the sounds are unique and not something I hear on a daily basis, so I'm not desensitized to them like I am to tapping or other sounds	1	1	1	1	1	Ear drops (in a tincture glass)	2	4	4	1
100	963	1	25	6	Bisexual female	USA	1	1	2	2	2	1	1	1	1	One of the girls plays with another girls hair (brushing, fingers through hair) and scratching her head and back	1	2	1	6	1	1	1	Indoors, in one of the girls bedrooms. Can see shoes on shelves	2	1	4	2	1	2	4	7	4	Specifically the way she scratches the other girls head, it's perfect	2	20	5	1	It's incredible
100	5878	1	25	1		England	1	1	1	1	1	1	1	1	2	The viewer is given a haircut while the hosts speaks in a relaxed, conversational manner.	1	4	1	7	4	1	3	Not sure. I'm blind so can't explain. It was a hair cut sound slice from Heather feather.	1	1	7	2	1	4	5	7	2	The relaxed personal attention, coupled with multiple realistic brushing/styling sounds.	4	42	10	2	There is no picture in the video. It doesn't just focus on one trigger all the time. During the cutting section of the haircut, the viewer's hair is also brushed between each few snips. The entire process is taken very casually, without any constraints of time.	2	1	1	2	1	A fan is switched on and ossolates.	2	4	4	3
99	7417	0	25	1		Germany	2	1	3	2	1	1	1	1	2	The host gives another person a head massage.	1	1	1	7	2	2	4	There is not much visible of the setting because the static camera focuses on the hands and the head, so the background is blurred. But in other videos the background can be seen as a tidy and welcoming living room of a typical student.	3	3	7	6	1	1	1	7	4	The sound of a scalp/the hair being scratched. This is a common trigger, but the audio quality is exceptionally good here. (I don't feel ASMR according to the normal definition; for me it is a state of deep relaxation and the feeling of human closeness.) Also, the female voice. I only watch videos which have soft, warm, soothing female voices.	1	3	3	1		1	1	1	1	2	Not a big difference, just a normal not-ASMR-intended (head)massage.	4	2	2	7
100	1114	1	26	6	Bisexual	UK	1	1	3	2	1	1	1	2	2	Woman having her hair played with and brushed, with a head massage	4	5	5	2	3	4	4	Someone's living room	5	5	7	5	3	4	5	7	4	Concentration on touching the nape of the neck	2	9	9	2		2	1	1	2	1	Floor being mopped	4	5	5	3
100	1394	1	26	7		USA	1	2	3	1	1	1	1	1	2	The host gives the viewer personal attention during a Cranial Nerve Exam	1	2	1	7	7	2	3	Room with blank walls with medical posters, a desk used for reception, a pointer used for exams	1	1	3	1	1	3	2	7	1	Organized, comforting, personal, interested in viewer's well being, materials ready and varied	2	30	3	1	woman conducting the video	2	1	1	2	1	music playing	3	2	2	5
100	1752	1	26	6	Demi grey-asexual woman	United States	1	1	2	1	1	1	1	1	2	The host examines and cleans the viewer's ears.	1	4	2	7	7	2	1	Appears like a welcoming, but professional medical office setting.	4	2	1	2	2	1	3	7	4	The clarity and quality of the binaural microphone, the research and acting ability of the host.	4	36	7 - 10 mins	2		2	1	1	2	1	Grinding herbs with a mortar and pestle.	2	4	3	7
100	2316	1	26	1		Argentina	1	1	2	1	1	1	1	2	2	The host whispers, not inaudible whispers but not soft	2	3	2	4	3	4	4	Small room with good illumination maybe because of bright coloured walls	2	3	4	2	2	3	5	6	4	The voice and accent of the host	2	30	15	3		1	1	1	2	1	Making a homemade telescope	4	4	3	4
100	2157	1	26	7		Netherlands	1	1	3	3	1	1	1	2	2	The host is caring and nurturing atention to the viewer. The host feels geniune and wants to soothe the viewer. The host shows a range of products to also relax the viewer.	2	4	2	6	4	2	2	I am not so familiar with the phyisical setting since the host is the part I focus on. I am looking up the video now to see what the physical setting is. There is just the face and shoulders and arms of the host and a beige wall behind her. No embellishments or anything noticeable.	4	2	6	3	1	4	6	7	3	It doesn't necessarily make me feel the strongest ASMR - it makes me feel the most comfortable and at ease and content. I believe the hosts energy and nurturing nature in the video is what makes it my favorite. I feel like she is fully there for me.	2	38	6	2	She seems very relaxed herself (the host) during the video. Transferring her emotion works very effectively.	1	1	1	2	1	Host describing her collection of rings.	2	1	2	6
100	1610	1	26	7		Uk	1	2	2	2	1	1	1	1	2	Host gives viewers spa treatments	1	2	1	6	3	2	4	Yellow wall with some brachytherapy decor and a blue light coming through a window	2	1	7	3	1	4	4	7	3	The asmrtist doesn't rush, words or actions. I notice that some others do, but this one takes her time and it's very calming. Additionally, she speaks close to the "ears" and mines touching the face, which is accompanied by sounds. These factors all contribute to it being a great video.	2	42 minutes	2 - 5 mins	1	No	1	1	1	2	1	Hands playing with cotton balls while whispering voice over	4	1	1	7
100	1972	1	26	3		USA	1	1	1	2	1	1	2	1	1	The video I'm watching now is a librarian setting someone up with a library card. Lots of typing on keyboards, tapping on books, etc.	1	3	2	7	4	2	3	The setting is in front of a backdrop that has bookshelves on it to look like a library. The woman is dressed in a business casual bright red outfit. Professional looking.	1	1	6	1	1	4	4	7	4	The ASMRtist voice is soothing. She's the only one I really watch. She has a Russian accent. Her voice on any video makes me experience ASMR. the tapping helps as well.	2	1 day, 11:00:00	8	2	Just that the artist, gentlewhispering on youtube, is the best and deserves more recognition. She's got the ASMR stuff down. Best in the game.	2	2	2	2	1	Waves, ocean	4	3	3	6
100	2348	1	26	7		United States	1	1	1	2	1	1	2	2	1	Whispering/Soft Spoken, Reading/Reviewing Comic Books, Page Turns	1	7	1	7	3	1	3	Top down view on a wooden table, clean and well-kept comic books	2	1	7	1	1	1	6	7	4	The content focus, page turning is gentle/slow/methodical, a nice voice (deeper, usually listen to women but I really like the lower tone of the man's voice in the videos), focus on content instead of the person	4	56 Minutes and 2 Seconds	56	5	No	1	1	2	2	1	Eating Swedish candies, mouth sounds, candy against bowl sounds	4	1	1	7
100	1667	1	26	7		Australia	1	1	1	2	1	1	1	1	2	Westworld tole play by Phoenician Sailor.	1	1		7		7	1	Had a professional green screen which set a realistic scene. Top video andbsound quality. Edited very well. Great lighting.	1	2	1	1	2	4	6	7	4	Works off a familiar scence. Hosts voice is calming and has a good tempo. Asmr triggers are naturally part of the flow of the role play, not unnecessary	2	60	10	2	No	2	1	1	2	1	Hair dryer	4	3	4	5
100	1806	1	26	1		United Kingdom	1	2	1	1	1	1	1	1	2	The host gives the viewer an eye exam	2	6	4	6	7	3	4	A plain room. Whote/cream walls.	4	3	3	3	2	3	5	7	1	The tone and temperament of voice - softly spoken or whispered. Low audio fidelity. Also one of the first videos to consistently trigger my ASMR.	2	20	4	1		2	1	1	2	1	Typing on a computer keyboard	3	4	4	1
100	798	1	26	3		United Kingdom	1	1	1	2	1	1	1	2	1	The host speaks to the viewer about their daily life including triggers.	2	6	3	6	4	3	3	In a lounge or living room	2	1	7	2	1		6	7	1	The soft-spoken whispering and attentiveness.	1	25	25	4		2	2	2	1	2	Soundscapes that are relaxing.	4	4	2	2
100	904	1	26	7		USA	1	1	2	3	1	1	1	1	2	The host gives a "spa" experience and blows gently from ear to ear with smoke, as well as lots of very soft whispering and hand movements	1	4	2	6	6	2	4	A soft neutral backdrop	3	2	4	3	1	4	3	7	1	The interaction and eye contact, as well as a "personal attention" role play	2	32	5 - 7 mins	2		1	1	1	2	1	Bath bomb demonstration	4	2	3	6
100	1341	1	26	1		New Zealand	1	1	1	3	1	1	1	1	2	Assorted popular ASMR triggers	4	4	2	4	3	3	3	Apartment, drawn curtains	3	3	4	4	3	4	5	7	4	Contains multiple triggers that I prefer	3	22	8	2	Nope	1	1	1	2	1	Tapping on a leather couch	4	4	3	4
100	2603	1	26	6	Pansexual Cis Woman	United States of America	1	1	2	3	1	1	1	2	1	The ASMRtist teaches us how to fold towels in fancy ways, very, very slowly.	1	5	3	6	4	3	2	The video focuses on Maria's hands folding bright white soft towels on a shiny black table, with a yellow wall and geometric wall art shown in the background and reflected on the table. Maria's nails are painted a glossy dark pink. Maria is wearing just regular clothes, all we can see are her jeans, her wristwatch, and the sleeves of her shirt.	2	1	3	1	2	1	5	7	3	The naturalness and simpleness of the task, the tone and gentleness of Maria's voice, the precision and the time taken with the towel folding.	4	18:31:00	The triggers sort of alternate and blend together throughout the video - she speaks as she folds and rubs out wrinkles with her hands. I guess a few minutes or so with each trigger if i had to divide it up.		I have not actually tried the skills I've learned watching this video, though I fully intend to. Also, Maria is consistently one of my favorite ASMRtists.	2	2	2	2	2	Rain pattering on a glass window during a thunderstorm	4	4	3	6
100	2220	1	27	7		Canada	1	1	2	2	1	1	1	1	1	YouTuber Karina Satori's hair cut video. I especially like the part where there is a comb or fingers very close moving near my face	2	4	2	5	3	2	2	It is hard to see a lot of background she is so close. But she is on a couch with pillows. Her sweater is more focused on. Mostly muted colors except her comb is bright purple	1	1	7	2	1	1	4	7	4	I enjoy personal attention and realistic situations.	2	13	3 - 5 min	1	Sometimes a video won't always give me ASMR. Like it will become too familiar and wont work any more. So I will have to look for different triggers	1	1	1	2	1	Fairy char tingly balls of makeup Pearl face brushing salon. It is misty the sound of mage up brush in Pearl make up	4	1	1	7
100	3665	1	27	4		Chile	1	2	2	3	1	1	1	1	1	The host makes a drawing of the viewer while describing her actions.	4	6	1	6	6	1	5	The host's bedroom. It's a clean, minimalistic and somewhat old-fashioned bedroom.	3	1	4	4	1	4	5	7	4	I feel this particular host has a very intimate approach and makes the viewer feel welcome and safe, there's no judgements or assumptions made of the viewer, just relaxing among friends.	2	I don't remember, the channel was taken down.	2 - 3 mins	1	The host didn't have good quality equipment at the time, so the video is slightly blurry and adds to the eerie atmosphere of it all. She also has a very particular way of speaking that is not inaudible, but pleasing.	2	1	1	2	1	Making and playing with slime. Different colors are used.	1	3	3	2
100	1084	1	27	6	bisexual woman	USA	1	1	3	1	1	1	1	1	1	The host touches the viewer's face, cleans the face, puts on makeup.	1	6	1	7	6	1	1	Very simple, light colored background	2	1	5	2	1	2	5	7	1	The personal care and attention, the artist's voice, the artist's face, the artist's hand movements	2	13	10	2	N/A	1	1	1	2	1	The artist is displaying different nail polishes	2	2	2	6
100	2156	1	27	6	Asexual woman	USA	1	1	3	3	2	1	1	2	1	(I don't have ONE favorite video, but in general) sounds are made with an object	1	3	2	6	5	3	3	A close up of the object making the noises / the object and the microphone	3	1	7	2	1	4	3	7	1	I don't know, the sounds made are effective to me as opposed to roleplay videos, which I don't like.	2	30	5	1		1	1	1	2	1	A knife is talked about and sharpened with water stones	4	4	4	3
100	3138	1	27	7		Uk	1	1	1	1	2	1	1	2	2	Host taps on white balance card and talks about the sound of rain	1	6	4	7	6	3	4	An off white wall	2	3	6	1	1	4	3	7	1	White balance card is a somewhat unusual tool to be used. It is a bassy, repetitive sound similar to cardboard but not as harsh, which I thoughly enjoy	2	25	25	4		2	2	1	2	2	Wave crashing on a creaking ship as heard from the deck	4	4	4	7
100	2152	1	27	6	Heteroromantic bisexual woman	Canada	1	1	2	1	1	1	1	2	1	Tapping a variety of objects close to mic	2	3	2	5	5	3	3	Sitting in her room, neutral Colors, tapping..	2	2	4	3	1	4	5	7	3	The type of trigger and her whispering voice. I don't feel asmr with all whispering voices.	2	30	5	1	Calm personality and talks slowly.	1	1	1	2	1	Make up brush tapping off excess make up before putting it on their face	3	2	2	4
100	1892	1	27	7		USA	1	1	2	2	1	1	1	2	1	The host walks through a recipe book and talks about her favorite recipes.	1	3	1	7	6	1	4	The video is a closeup on the book and hands of the host turning through the pages. The book is Ina table with a small candle or 2 near it.	2	1	6	3	1	6	5	7	4	It's a combination of the delicate hand movements. the lipsmacking of the whispering, and the slow, unscripted nature.	2	25	20	3		1	1	1	2	2	The video is just audio ASMR with a loop of a strange video that looks sort of like slowly waving coral that slightly changes color during the course of the video.	4	4	2	7
100	16946	1	28	7		South Africa	1	1	2	2	1	1	1	2	1	Discussing everyday objects	2	3	1	6	2	1	4	Warm, safe, welcoming, familiar	1	1	6	1	1	2	3	7	4	The way the artist carries herself. Her demeanor creates the perfect atmosphere.	1	40-50	10	2	More often the most basic videos have the strongest impact.	1	1	1	2	2	Massage turorials, instructional.	4	3	1	2
100	2975	1	28	7		United Kingdom	1	1	3	1	2	1	1	1	2	The artist is a surgeon who subjects the viewer to various ASMR triggering stimuli.	6		3	2	6	6	6	The bedroom or attic room of the creator.	6	4	6	3	6	4	1	6	4	The artist gives the viewer a name which he then uses to refer to them through the video	1	60	5	1	The artist uses a combination of talking to the viewer and using a voice recorder device to make observations about his 'patient' (the viewer). This creates spells where the viewer is not required to pay attention and may even drift off to sleep.	2	2	2	2	2	Rain falling on canvas	4	2	3	6
100	1464	1	28	1		United States	1	1	1	1	1	1	1	2	2	Inaudible Ear to Ear + Blowing in the Microphone + Whispering in Polish	4	4	4	4	6	2	4	Camera holds extended single shot of womans collarbone in button-up shirt as she rotates around mic with green-screen of blossoming tree in background.	4	4	6	4	2	2	4	6	4	Tons of hard 'K' sounds, and other mouth sounds that pop like bubbles.	4	25	8	2		2	1	2	2	2	I had to pick answers because there's no N/A option. I do not watch unintentional ASMR videos.	4	4	4	4
100	2358	1	28	7		Norway	1	1	2	1	1	1	1	1	2	The hostess checks me in at a hotel and talks about some of the things to do in the area	1	2	1	7	3	2	3	Simple backdrop with a curtain or wall-paper with flowers. Good lighting, and close up picture of the hostess.	2	1	3	2	2	3	1	7	4	I like the hostess voice and the lip-smacking/gum chewing. I also like the personal attention, but without it being sexual in any way. It also contains some writing on paper and keyboard.	2	40	It isnÂ´t separated in to different triggers.		It doesnÂ´t contain any touching or brushing against the microphone, and its quite calming. The hostess ask me a variety of questions and writes down "my answers".	1	1	1	2	1	The narrator is displaying different rings and tells me different stories and information about them	2	2	2	3
100	4460	1	28	1		USA	1	1	1	2	1	1	1	1	2	The host roleplays as a flight attendant.	1	4	3	6	4	4	4	The flight attendant is wearing a blue uniform, there is a black curtain behind her that takes up the whole frame. There are other seats around, but they are not really visible. The primary point of view would be one of a passenger in a plane.	2	2	6	3	3	3	2	7	2	I experience ASMR in day to day life. One of my earliest memories of ASMR, and one of my favorite real world triggers, is the presentation performed by the flight attendants prior to take off.	4	30 minutes	unsure, this roleplay is more about the experience rather than specific triggers.		Visual triggers, such as hand movements or other deliberate movements, are also a trigger for me. This video also contains "scripted movements" that are a trigger for me in addition to the sounds.	2	1	2	2	1	The video shows the process of a high end camera being made by hand.	4	3	3	3
100	1419	1	28	6	Pansexual woman/Genderfluid person	USa	1	1	1	1	1	1	1	1	2	Follow the light	2	5	2	5	6	3	4	Indoors in front of a curtain	2	2	2	2	2	1	5	7	3	Light triggers work very well for me, binaural sound helps	3	30 min	25	4	no	2	1	1	2	1	Paint mixing	1	3	3	3
100	1858	1	29	1		United states	1	1	1	1	1	1	2	2	2	Whispered facts about outer space.	1	4	1	7	3	1	3	In a room with leather chairs and mic showing at the bottom of the screen.	1	1	1	1	1	4	7	7	4	The whisper to a soft voice to a whisper again and the closeness to the mic.	1	About 30 min	30 min		The intro to the video is very relaxing which is why I watched it to begin with.	1	1	1	2	1	Tuning fork sounds.	4	1	1	1
100	1758	1	29	6	bisexual woman	Mexico	1	1	1	3	1	1	1	1	2	futuristic travel agent	1	1	2	7	7	1	1	a green screen with a logo in the background and warm light coming from an indirect source	2	1	3	1	2	5	5	7	4	the performer has a good voice and shes very meticulous she specialises in personal attention and it shows	1	15	4	1	the special effects make it really stand out	2	1	1	2	2	a person out of camera is cooking	4	2	1	2
100	1854	1	29	6	Bisexual	Scotland	1	1	3	2	1	1	1	2	1	The host carefully shows a collection of something, usually made from paper (for example, magazines), quietly whispering over the top. Host usually makes gentle hand movements and creates noises with the paper (for example, crinkling, or folding)	3	4	4	4	4	4	4	Indoors in a quiet setting	3	3	5	5	2	5	5	6	4	Has more of a natural feel rather than overly scripted studio kinds that you get. The asmr artist is particularly good at making videos... she is one of the most popular... she has very relaxing voice and mannerisms and i love paper sounds	1	30				2	1	1	1	1	Pages of a book being turned	4	4	4	4
100	6949	1	30	7		USA	1	1	3	1	1	1	1	2	1	ASMRtist showing cards and journals while tapping on them and crinkling the packaging. Whispering and soft spoken and slow hand movementa	1	1	1	7	5	1	4	Library backdrop and a artist sitting at a table	4	1	6	1	1	4	4	7	4	The pace of speaking and movements is perfect for me. She very gentle crinkles and taps as opposed to fast movements or harsher whispers/speakinf	3	30?				1	2	1	2	2	Outdoor and indoor house tour with whispered narration and soft music	4	4	1	7
100	2095	1	30	2		Uk	1	2	2	1	2	1	2	2	2	Indian head massage	6	3	6	1	2	2	7	Indian Barber shop. Untidy and not that clean.	4	2	6	6	1	5	6	7	4	The barber attitude and the sound of his breathing and the friction of his hands on the head.	2	10	10	2		2	1	2	1	1	Whitw noise: hairdryer	4	6	6	6
100	1400	1	30	1		USA	1	1	1	1	1	1	1	1	2	The host gives the viewer a beard trim.	3	4	3	5	4	2	3	Set in what appears to be a bedroom but most details are blurred.	3	2	5	5	2	3	4	6	4	Soothing voice with varied trigger sounds.	2	20	3	1		2	2	2	2	2	Rain drops falling on a plastic bag.	4	5	4	6
100	2735	1	30	1		USA	1	1	1	3	1	1	1	1	2	The host gives the viewer personal attention, waves their hands slowly and in a low voice, narrates the video.	1	5	1	6	6	3	5	An apartment, or some type of residence.	2	1	5	4	1	6	7	7	4	It's a combination of things. One is that not all triggers work all the time. I build up a sort of "tolerance" to certain triggers as I watch them more often. This video uses different stimuli than I have used recently. It's also a long video. Tingles can last for a long time if you choose a long video. As soon as it's over, you'd have to rewatch it (with a reduced effect) or hope you find a new …	3	45	45	5		2	1	1	2	1	Someone is fidgeting with what looks like a toy or gadget.	1	4	4	3
100	5525	1	30	7		United States	1	1	1	1	2	1	2	2	1	Girl uses her hands to play with plastic and scratches manicured nails on different surfaces	1	1	1	7	1	2	1	All is dark except what she is doing with her hands					1	6	3	7	4	Sound and visual combined	1	5 minutes	5 minutes	1	It was simple and used ASMR in constant transition throughout. Start to finish .	2	2	2	2	2	It was a nature walk in the woods , you could hear leaves crunching under foot, water flowing through a ravine and claws scrating on tree bark.	4	1	1	4
100	4523	1	31	6	Bisexual Woman	United States	1	2	3	1	1	1	1	1	2	Host gives viewer a medical exam	2	6	3	6	2	3	3	It's a close up on host with only viewable background being a poster/wallpaper in black & white with a line of phone booths falling like dominoes. They're each a different color of the rainbow.	3	2	3	3	2	5	3	6	4	Soft spoken, writing noises, personal attention	4	22			There's also follow the light & finger triggers & positive affirmations	1	1	1	2	1	Pop up book being read	4	2	2	6
100	824	1	31	6	Bixexual woman	Netherlands	1	2	3	3	1	1	1	1	2	Host does make up	2	2	2	6	6	2	3	In a bedroom i believe	2	2	6	2	2	3	6	7	4	Sounds and the way it is done	3	30				2	1	1	2	1	Someone brushing model cars	4	2	2	3
100	1791	1	31	7		UK	1	1	2	2	1	1	1	1	2	Role play of being taken care of, head massage, host is very attentive and soft spoken.	3	6	2	6	6	2	4	cant see much of the background as the host is up close to camera	2	2	6	4	2	4	6	7	4	I think it's a mix of everything, soft spoken words, the rustling noises, what is being said and the language used, the hosts voice too.	2	40	10	2		1	1	1	2	1	Tapping on various different objects	2	3	2	5
100	2187	1	31	1		United Kingdom	1	1	2	3	1	1	1	1	2	The host performs an eye examination/medical examination	2	6	1	7	6	2	4	Black background. Indoors	2	3	2	2	1	4	2	7	2	Whispering. Medical setting. Flashlight work	1	17	5	1	Na	2	1	2	2	2	N/a - Dont watch these kind of videos	4	4	4	4
100	1566	1	31	7		USA	1	1	1	1	1	1	1	1	2	The host treats the viewer to a facial spa treatment.	1	4	1	7	4	1	4	Set up as if you are seated in a reclining chair, looking at a colorful sign that says, "Spa". You can't see much else besides the host, otherwise.	1	1	4	1	1	4	1	7	4	The host's soft voice, the sounds she uses (steam machine), the sound of her lab coat, etc.	1	35	5	1		1	1	1	2	2	Certain cooking video tutorials	4	1	1	7
100	2517	1	31	7		Georgia	1	2	3	3	2	1	2	2	1	short video about manufacturing Leica camera, its bag & details.	2	6	4	6	3	4	4	a factory, but zoomed toobject, cant see much.	4	4	4	1	2	6	6	6	4	its realness and very strong professional detail orientation	2	3	0.3	1	its loud and distracting sometimes but again one of the bets triggers for me, much better than simulations or fake asmr videos.	2	1	1	2	1	Japanese crafts	4	3	2	6
100	2228	1	31	1		USA	1	2	3	2	1	2	1	1	2	Riding in front seat of car on office lunch break	4	4	3	4	4	4	3	POV of front passenger seat of car	3	4	5	5	2	2	3	5	4	It's 100% the opening line, "let's go get some lunch." The rest I don't even remember much of. I am yet to be triggered by another video; unclear why this one works. It's something about the mundane, friendly delivery of that line. It's not as overwrought of a roleplay as others.	1	Don't remember	0			2	1	1	2	1	Not video. Binaural audio of a Tic-tac container, or something similar, being walked around and shaken.	4	4	4	3
100	1423	1	31	3		Canada	1	1	3	1	1	1	1	1	1	The host shows the viewer pages from various coffee table books.	2	2	2	6	5	2	4	A traditional library looking background.	3	3	4	2	2	2	6	7	4	The page sounds, pointing, and the mostly unscripted narration.	1	30	15	3	No	1	1	1	2	1	Leading through a newspaper flyer and circling items with a squeaky marker.	4	3	3	5
100	4540	1	32	1		USA	1	1	2	3	1	1	1	1	2	I cannot watch one particular video multiple times in a row and still produce the same effect. Although I can return to specific content again for response at later date. Favorites include "Realistic Barber Role......Cosmic Tingles ASMR.	1	2	1	6	4	2	4	Made to look similar to barbershop with mirror, chairs, and towels/small items on some shelves	2	1	3	2	1	4	4	6	4	Although I do like personal attention videos I feel sound is the most important aspect. The crinkly sound of razor vs hair or medical gloves is one of my favorite.	3	30	10	2	The same artist does another barber video I do not like. I also don't enjoy some of the most produced asmrtists as well, my largest enjoyed video selection is from ASMR Glow.	2	1	1	2	1	Playing with kinetic sand	1	4	3	3
100	2949	1	32	7		UK	1	1	3	3	1	1	2	1	2	The host gives the viewer a spa treatment including a face mask, a head and neck massage and hairbrushing accompanied by softly spoken narration and positive affirmations. Part of the video is performed in the dark with a bright light used to perform some skin extractions.	2	2	1	6	5	3	2	Looking at a wall with a sheer material cover with a few wooden style decorations. Part of the video is spent looking at the ceiling, which is plain and light coloured. The whole video has a neutral colour overall.	3	1	5	2	1	5	5	7	4	The personal attention and soft voice. Immersion and plausability are also very important.	3	25	5	1		1	1	1	2	1	The ASMRtist plays with various materials, tapping them and touching them to create soothing sounds.	4	3	3	7
100	8495	1	32	6	Demisexual/Pan-Demisexual	USA	1	1	2	1	1	1	1	1	2	Host (sitting at a desk) registers the viewer into a database by asking them questions and entering the data into a computer.	1	3	2	7	5	6	2	â€¢ Small, artificially lit patient exam room (office/hospital ceiling tube lights). â€¢Sterile/medical setting. â€¢Some non-threatening medical equipment and medical hand tools). â€¢No loud extraneous noises (some nearly inaudible, unintentionally ambient, electrical/mechanical humming/buzzing/clicking/whirring that does not detract or distract from situation). â€¢ "Emotionally Neutral" (ie: giv…	4	3	1	2	4	2	1	7	4	Two things which require a fair amount of explanation (sorry!): What it does: Recreates a data-gathering appointment realistically. There are awkward gaps in conversation, quiet key clacking(patterned clacking like words being entered and not key mashing), the clerk talking to themselves/making noises people make with entering data real-time, and there are changes in their speech(not monotone whi…	4	20 minutes	One main focus with several small ones organically occurring.		It's one of a few in my "C-PTSD Playlist" that I've never gotten to the end of. The ASMR response from it is so intense that I "pass out" (fall asleep so fast -within 10-20 seconds of starting the video - that I don't remember closing my eyes). It's part of my emotional recovery aftercare when re-experiencing traumatic memories and PTSD-related anxiety attacks, and is also a preventative tool for…	2	1	1	2	1	Unpacking Japanese "squishy" toys. Some are wrapped in cellophane.	4	4	4	5
100	7514	1	32	6	Pansexual	Usa	1	1	1	1	1	1	1	1	1	A salesperson shows different candies and describes them, then packs them in to bag for a party.	1	7	4	7	7	4	2	All black. Black walls, black table. The background is meant to be completely non-distracting from the objects being shown.	2	3	1	1	1	2	1	6	2	I'm honestly unsure. It may be the slow and even tone of the ASMRtist. But I due usually get triggered more easily by videos that present a lot of information in an organized manner, particularly when they describe colors/flavors/scents etc. Describing a food or drink list or menu is a very easy trigger for me.	2	30-45?	1 - 3 mins	1	The microphone quality is excellent and there is no unintended background noise. The ASMRtist also focuses on hands and hand movements a lot in this video and her physical care in manipulating objects is a major trigger as well.	2	1	1	2	1	Oragami folding	2	4	4	1
100	1304	1	32	7		norway	1	2	3	1	1	1	1	1	2	the host tries on clothes on the viewer	1	2	3	3	4	4	4	a clothes shop	3	3	2	5	4	5	4	6	4	a lot of the right triggers; personal attention, thinking, saying what they're thinking out loud slowly, detailed	3	40	it's not split up in triggers			2	1	1	2	1	japanese person trying out various japanese snacks	2	4	4	1
100	1205	1	32	3		USA	1	1	3	1	1	1	1	1	1	The host(ess) pretends to sell the viewer cosmetic products.	1	3	2	6	4	3	2	Inside a home.	2	1	7	2	1	6	7	7	1	The host(ess) speaks with a particular accent and pretends that she has been waiting for me/is happy to see me again.	2	20	20	3
100	1023	1	32	3		Uk	1	1	1	1	2	1	1	1	1	Host cleans a keyboard	1	1	1	7	4	1	4	Just a focus on the keyboard and the utensils and products being used to clean it	1	1	4	1	1	4	4	7	4	The use of varied methods to clean the keyboard	2	30	10	2	No	1	1	1	1	1	Someone ironing a shirt	4	1	1	4
100	779	1	32	7		USA	1	1	3	2	2	1	1	2	1	Chiropractic exam	1	4	2	7	7	4	4	Typical doctors office	2	2	1	1	1	2	3	7	1	Intricacy of exam	1	8	8	2		2	1	1	2	1	Organizing clothing	1	1	1	4
100	1704	1	32	3		USA	1	2	2	2	1	1	1	1	1	host pretends to do an infomercial on futuristic clothes hangers	1	1	1	7	4	3	1	a futuristic office building	1	1	4	1		4	5	7	4	the hosts voice and precise mannerisms	3	10	10	2		1	1	1	2	1	someone off screen moving marbles around	3	1	1	7
100	2224	1	32	7		Finland	1	1	1	2	1	1	1	1	2	All sorts of personal attention such as a haircut, spa treatment, massage, make-up application and so forth	1	3	1	6	4	3	2		2	1	3	2	1	4	2	7	4	Excellent sound quality with close to no outside disturbances at all	2	45	5	1
100	1291	1	33	7		Uk	1	1	3	2	2	1	1	1	2	It's of a girl giving a man a face massage with very detailed and repetitive movements	1	7	4	7	7	4	3	It's quite close up so no real background I think the wall behind is painted white	4	2	1	1	3	1	7	7	1	It's the girls hand movements on his face	2	15	15	3							I can't complete this as I haven't found asmr in any natural form only videos I've specifically searched for and people in real life
100	1360	1	33	7		USA	1	2	2	2	1	1	1	1	1	The host is whispering to and "touching" viewers face, hair, playing with different objects and their sounds- variety of noises	1	4	3	7	4	2	3	Very plain - host, table, ear shaped microphone, and nothing on walls or anything.	3	3	2	3	3	4	3	7	4	The variety of noises made and the special ear shaped microphone intensifies the sounds makes them seem more real. I enjoy variety in a video though not exclusively.	3	10 minutes	2	1		2	1	1	2	1	Tapping/scratching sounds on wood	4	2	1	6
100	3465	1	33	6	asexual woman	United States	1	1	1	1	1	1	1	1	2	The host gives the viewer an argan oil hair treatment, scalp massage, and hair brushing while they and the viewer sit in a darkened room lit by a fire and candles.	1	3	1	6	6	1	3	The video is a close up of the host's face with a wall and candles visible in the background. She is lit from the side by the fire.	1	1	7	2	1	2	3	7	1	The colors are warm and the overall environment is darkened and intimate. This particular host is very triggering for me because she does not go out of her way to try to create a triggering sound, for example some ASMRtists will focus on brushing the microphone, which triggers misophonia for me. She brushes the microphone incidentally, without focusing on it, which is a trigger for me.	1	30	5	1	The host also engages in slow, deliberate hand motions and soft speaking. She also has an English accent, and non-American accents can be very triggering. The video is so effective at causing ASMR for me that just thinking about the video is triggering a response.	2	1	1	2	1	It's a very short video of a woman with nicely manicured hands stroking and petting a pet rat.	2	1	3	7
100	1298	1	33	7		USA	1	1	2	1	1	1	1	1	2	The host is selling handbags in a qvc style manner.	1	1	1	7	7	3	2	The lighting isn't too bright, white background her clothing isn't overwhelming.	1	1	5	1	1	4	1	7	1	Tone of voice she alternates between soft spoken to an almost inaudible whisper, not alot of props.	2	20 minutes	3	1
100	904	1	33	7		Uk	1	1	3	3	1	1	1	1	1	The host gives the viewer an eye exam	1	5	3	6	5	4	2	Office type room	4	3	2	2	3	2	3	7	4	Strong focus on personal attention. Close up examination.	2	20	10	2		2	1	2	2	2	Beach sounds	4	2	2	6
100	2509	1	34	7		U.S.A.	1	1	1	2	1	1	1	2	1	Done by Gentle Whispering called Simple Pleasures. I rarely watch the video, just audio. This is mainly due to the fact that I want to sleep and do not want the light from the screen to keep me awake. Marina's soft spoken voice triggers me. Videos where she is wearing a crinkly shirt trigger me best. Also when she brushes hair (sound).	2	6	2	6	4	4	4	Simple backdrop. Can't remember color. Focus is more on Maria than enviorment.	3	2	2	2	2	2	4	7	1	Maria is in it. The artist is the biggest factor. Her voice triggers me better than any other artist. And again, a video with Maria in a crinkly shirt giving personal attention close to her microphones will always trigger me best.	3	40 min	5-15 min	2	I need to watch other video's as well because overtime the stimulation of any one video decreases. After a break I can go back to it. The same can be said for ASMR video's in general. Overexposure decreases the sensation.	1	2	2	1	1	By WhispersCrystal, who no longer is an ASMR Artist and only had a backdrop up while she spoke. It is a role play set on a beach spa. You are the guest. She goes over a list of drinks and prepares it and then you get a massage.	4	1	1	7
100	1412	1	34	1		England	1	1	3	1	1	1	1	2	2	Inaudible close up whispering	1	4	4	6	6	3	4	Bedroom	2	3	6	4	2	4	4	7	1	The friendly soft spoken none sexualised women	1	20	15	3	No	2	1	2	2	2	Glittery makeup application on hand	4	2	4	4
100	1845	1	34	7		USA	1	1	3	1	1	1	1	2	1	Maria from Gentlewhispering on youtube recently released a video where she provides intructions on the proper way to iron clothes. She uses a soft spoken narative and its very quiet and soothing and the noises are a bit repetitive which is heaven. Takes me back to being a kid watching my mom iron.	1	5	1	6	5	3	4	A close up of her ironing board in her bedroom. You only see her hands through 90% of the video	2	1	6	2	2	3	4	7	4	Nostalgia, repetition, and simplicity	1	I think like 30-40 min	30	4	Maria is an expert. Her triggers are similar to mine so I go to her often. Her russian accent also helps. For me asmr videos with accents are especially effective. I dont know why.	2	2	2	2	2	Sounds of a park with children playing in background	4	1	1	7
100	2277	1	34	7		USA	1	1	3	3	2	1	1	2	1	Person is eating with a natural form of lip smacking, not exaggerated. They are gently handling the food using chopsticks and gently unwrapping food in package.	1	4	1	7	3	2	2	Simple. Wood table and place setting up close to the camera. Van Gogh painting in the background.	3	2	6	2	1	4	4	7	4	The gentle mannerism of the person making the video.	3	20	5-10 mins	2
100	2322	1	34	7		US	1	1	1	2	2	1	1	2	1	I don't actually like most ASMR artists. I very much prefer unintentional ASMR. Watching certain home shopping hosts, massage tutorials, crystal healers, energy healers, product demos etc. I've had certain college professors that spoke a particular way. Role play doesn't do it for me. It's like watching sex (I am in no way turned on by ASMR) but I like real genuine sex but porn does nothing for m…	1		2		6		4	I don't like settings where in the focus I like watching something being done	2		4		1		7		4	The sounds of objects and clinking and hand movements but NOT incessant tapping. Don't just tap to tap! Do something	2	1 hour	zero. Should be an overall experience		It's gemstone therapies with Isabelle Morton	2	1	1	2			4	1	1	4
100	3518	1	34	1		Canada	1	1	1	2	1	1	1	2	2	The host uses a unique microphone setup (3Dio binaural microphone on one side, a single mic on the other) to produce highly sensitive sounds with a remarkable echo effect. Uses a number of items to produce sounds, primarily tapping, and also speaks into the microphones.	1	2	2	6	3	4	1	The host is visible from the chest up in comfortable clothes, facing the camera. The microphones are on either side of the host. The background is a digital image of black and blue cubes created using a green screen.	3	2	2	1	3	3	6	7	4	The remarkable and unique echo effect on both the items tapped and scratched, and the host's voice. The hand motions are also effective, to a lesser extent.	4	23	4 - 8 mins	2	The host has a distinct eastern European accent which, for some reason, acts as a trigger in and of itself.	2	1	1	1	2	The video features a still image of a pair of cotton swabs. The audio is a simulation of a visit to a otorhinolaryngologist, and includes 3D audio of the sound of a person walking around the listener, writing and typing notes, spraying and wiping hands, putting on gloves, handling/cleaning ears, etc.	4	4	4	1
100	6143	1	34	7		Sweden	1	1	3	2	1	1	1	1	2	The host uses aromas, colors, water sprays and whispering to balance the chakras of the viewer.	3	4	2	5	2	2	3	Black background, colored circles, some flowers.	3	2	6	5	2	1	4	7	2	Even sound levels, nice combination of sounds and personal attention. Does not mention asmr. I do not believe in chakras etc whatsoever but that is unimportant if it is a good video.	2	43 min	Don't know, they interlap
100	1325	1	34	7		Denmark	1	2	3	2	1	1	1	1	2	Scalp massage with narrator	4	4	4	2	7	2	6	Average living room	4	4	7	7	1	4	7	7	4	Not scripted	3	20	5	1		2	1	1	2	1		1	4	4	2
100	1354	1	34	1		USA	1	1	1	2	1	1	2	1	2	A man opens an essential oil diffuser and demonstrates it. Also, Ally Maque host a customer in a candy shop. Amazing.	1	2	2	7	2	2	2	1. in the man's home. 2. in an imaginary candy shop	2	1	4	2	2	4	6	7	4	The voice(s) are calm and dry; soft chewing and crinkling; reading off descriptions of products is very soothing.	4	Around 30 minutes	Not sure; it's too relaxing to focus on such things.		A little sarcasm and laughter doesn't hurt; it's happy-making.	2	1	1	2	1	Woman eating a crispy, Vlassic pickle.	4	2	2	5
100	1221	1	35	1		United States of America	1	1	2	3	1	1	1	1	2	The host is massaging the viewer's head	4	4	1	4	4	3	3	Just a plain room	1	1	5	4	2	2	6	6	3	Personal attention	1	35	5	1		1	1	2	2	1	The process of making crayons	4	2	2	3
99	1882	0	35	7		Spain	1	1	3	2	2	1	1	2	1	A woman with very long nails tapping on a box and then making rustling noises with the contents of the box.	3	5	2	5	4	3	4	I'm not sure. Looks like a bedroom. The woman is sitting at a table. I don't recall much about the background. There's natural light though, I think, coming from a window.	3	2	6	4	1	4	5	6	4	I don't like it when there's narration, and this one has no speaking. I also like the fact that she does the same action for a long period of time. I find it harder to get into and enjoy it when I know whatever's happening is going to suddenly stop and change to something else.	1	30	12 or so	3	The tapping noise and the visuals combine to make it relaxing.	2	1	2	1	2	Man having a head massage	4	2	3	6
100	5337	1	36	7		Mexico	1	2	3	3	1	1	1	1	2	The host does makeup and hair to the viewer	5	2	1	4	3	1	5	Lots of posters on the back wall, camera is on a table, she's seen only from chest up, she speaks softly and moves her hands as she speaks, takes objects and shows them to the viewer describing how it's gonna work. She has big eyes and rings on her fingers.	3	1	6	5	1	3	5	7	4	She seems like a genuine person, not scripted, not ambitious, she has a sweet voice and an innocent appearence, like she's doing it because she likes it, not to make money as other youtubers	3	15	15	3	She uses all of the triggers all the time, voice, scratching sounds, movement of hands, engaging in caring for the viewer. Anyway voice is not a trigger for me.	2	1	1	2	1	Progression of drawings	1	4	4	4
100	2341	1	36	7		United States	1	1	1	1	1	1	2	2	1	Female discuses and goes through the process of cleaning, filling, and smoking a pipe.	1	2	2	7	5	3	3	The video appears to be filmed in the host's kitchen, while she's seated at a table.	3	2	7	2	2	2	4	7	4	A combination of elements: the speaker's voice (tone, volume, and speed), combined with slow but deliberate hand movements, and the sounds from handling the objects.	3	25				2	2	2	2	2	Rain on a tent	4	2	1	7
100	1569	1	36	7		USA	1	2	2	1	1	1	1	2	2	The person explains/instructs how to do something.	2	4	2	6	4	3	3	office or workshop	2	2	6	2	2	4	6	6	4	The detailed explanation and instruction in a soothing voice.	1	5	5	1		1	1	1	1	2	a person giving a haircut and shave	4	2	2	6
100	2522	1	36	1		Scotland	1	1	1	1	1	1	1	2	2	The video I was picturing is one that always comes to mind and was one of the very first i ever came across. It was of MalASMR on YouTube at work, recording 15 minutes or so of her doing mainly administrative tasks. At one point she picks up a sealed plastic bag of stationery and begins to crinkle it in front of the camera. The sounds and the ambiance of the office were enough to trigger the phen…	4	4	4	4	4	4	4	In an office.	2	2	4	3	2	4	6	7	4	It was one of the very first videos I'd seen that triggered the response, outside of real life.	2	15 minutes	1	1	Said video: https://www.youtube.com/watch?v=xU95b_67c1U	2	1	1	2	1	Assembling a Japanese toy-like food from a prepackaged product.	4	2	2	2
100	3368	1	36	6	hetero romantic asexual	Germany	1	1	2	3	1	1	1	2	1	Someone makes sounds with certain items	2	4	3	6	6	2	3		3	2	6	4	2	4	4	7	3	strong crinkly sounds	1	30min	25min	4		2	2	2	2	2	Sounds of a sailing boat on sea.	4	4	4	7
100	1065	1	36	7		Usa	1	2	2	1	2	1	1	2	1	Someone turning pages in a book and a magazine	2	6	2	6	4	3	4	Just focused on the book pages	4	4	4	3	3	3	5	6	3	The sounds of the pages turning	2	1 hour	45	5		2	1	1	2	1	Pages turning	3	4
100	2575	1	36	7		United States	1	1	3	2	1	1	1	1	1	The host talks gibberish and with an accent. He does repetitive tasks and makes things.	2	3	1	6	2	2	2	Work desk with a green screen background of a lab.	2	2	5	2	2	5	3	6	4	The gibberish talking and technical terms. The specific sounds he makes with his objects.	4	45	30	4		2	2	2	2	2	Trees blowing and wind and rain sounds	4	2	2	7
99	851	0	36	7		UK	1	2	3	2	1	1	1	1	2	The host gives the viewer an eye test	1	1	2	7	6	5	2	Optician's room so medical style but private.	4	4	3	2	2	2	4	7	4	Realistic	2	45	Not sure			2	1	1	2	1	Colouring in	1	4	4	4
100	2079	1	37	7		UK	1	1	3	3	1	1	1	1	1	Host demonstrates books to viewer.	1	6	2	7	4	3	4	Indoors, table with host sitting opposite viewer. No props other than books and a small handwritten sign on wall.	2	2	5	1	2	4	3	7	1	Books - sounds and touching.	3	40	7	2	Contains close up whispering towards the end which increases tingles for me.	2	2	1	2	1	Camp fire	4	3	1	7
100	762	1	37	7		United Kingdom	1	1	1	2	1	1	1	1	1	Facial massage tutorial	1	6	2	6	5	3	2	Make up studio	2	2	2	2	1	2	2	7	1	Calm voice.	2	25				2	2	2	2	1	Murmuration	4	3	2	6
100	1795	1	37	7		USA	1	1	2	2	1	1	1	2	1	The host opens a bath bomb kit and makes bath bombs	1	5	2	7	6	3	5	Sitting at at a table	3	3	5	2	1	2	5	7	1	Whispering, hand and facial movements	2	30	20	3	Natural and not forced or scripted	1	1	1	2	1	Scrapbooking	4	2	2	6
100	1202	1	38	7		Denmark	1	1	1	1	1	1	1	2	1	The host is tapping, scratching microphone and whispering	1	2	1	6	5	1	1	Very little detail in the room, white wall	1	1	7	1	1	1	5	7	1	Specific sounds, speed and volume of host speech	2	30	10	2	Very relaxed, slow paced video	1	2	2	2	2	Sound of snow crunching	1	1	1	4
100	858	1	38	7		Wales	1	1	1	2	1	1	2	2	2	The host eats crunchy food and whispers	1	2	1	6	5	2	4	In a room with bare furnishings	1	1	6	4	1	3	6	6	1	The hosts tone of voice and the crunching noises	4	20	20	3		2	1	1	2	1	Dog chewing rawhide	1	2	2	6
100	1946	1	38	1		Usa	1	1	3	2	2	1	1	1	2	The artist is fixing up the users head.	1	4	1	7	6	4	2	There is little setting to it. It's a blank background. The angle is so tight you mostly see the artist face.	1	1	2	4	1	3	3	7	1	Strong personal attension. It makes you feel as I'd the artist is in the room with you.	1	40	5	1	The artist is a very pretty girl. Exploring gender issues would be a good topic for future research to women prefer male/female artist to what degree, etc.	1	2	1	2	2	Nature walk.	4	2	2	6
100	1256	1	38	7		New Zealand	1	1	3	1	1	1	1	2	1	Rubbing, brushing the microphones	1	6	2	6	6	2	4	Black background, asmrtist on screen seated. View from chest to nose (top of head not visible), hand gestures prominent	1	1	6	3	1	3	6	7	2	The specific quality of the sound - the binaural mic rubbing. I respond best to long, continuous sounds.	2	45	45	5	The content creator has a very relaxed and pleasant presence.	2	1	1	1	1	Ear cleaning	2	4	3	3
100	2081	1	38	1		USA	1	1	3	2	1	1	1	1	2	The host is fitting the viewer for a suit. My 2nd favorite is one depicting the host giving the viewer a haircut and shave.	1	4	1	7	4	2	4	A living-room meant to portray the host's suit store/barbershop.	2	2	6	2	1	2	4	7	4	The tone of the hosts voice and accent, his eye contact, smooth movements/gestures, and level of detail regarding knowledge of portraying a realistic suit-fitter/barber.	3	30	25	4		2	2	2	2	2	Monkey grooming a person's hair.	4	1	2	4
100	996	1	39	7		USA	1	1	2	2	2	1	1	1	2	Skin analysis/spa treatment	1	2	1	6	3	2	2	Soft lighting in a staged spa setting using real props rather than a video backdrop/green screen	2	1	3	2	1	6	4	7	4	Soft spoken, careful personal attention and consistent volume	2	40	7	2	No	1	2	2	2	2	Nature walk with bird sounds	4	2	2	6
100	1964	1	39	7		USA	1	1	2	1	1	1	1	1	2	Gentlewhispering Flight Attendant simulation.	1	2	1	7	7	2	5	Simulated airplane seat with aisle.	1	1	5	1	1	2	2	7	2	Relaxing voice, personal attention, airplane white noise,	2	35	30	4	Just one of many I love.	2	2	1	2	2	Building a hut in woods	4	2	1	7
100	1596	1	39	1		Uk	1	1	1	2	1	1	1	2	2	It's a tutorial on how to sew a costume. Details on measuring, cutting, folding etc.	4	1	4	4	4	4	4	Girl in her room, close up videos of her desk and sewing machine. Various lighting.	3	4	5	5	2	6	4	7	4	I like tutorials and instructional videos. 'Accidental ASMR' videos work best though some scripted ones work too. Mainly soft spoken, whispering is too far the other way.	2	30+	30	3
100	1762	1	39	7		usa	1	2	3	1	1	1	1	1	2	host gives viewer a medical checkup	1	2	1	7	4	3	2	doctors office	1	2	2	2	1	3	2	7	4	the host is very gentle and caring in her voice and facial expressions	3	40	5	1		2	2	1	2	2	rain on a roof	3	1	1	4
100	1120	1	39	7		USA	1	1	3	1	2	1	1	2	1	The host scratches a friends back. ASMR videos usually do NOT work for me if I can see either the host or models faces.	2	6	4	6	6	4	4	Camera focused on the back of the person receiving the back scratch, only a few peripheral items visible in room	4	4	3	3	2	2	6	7	1	No talking, scratching sounds clear, no faces seen, I enjoyed the rhythm and hand movements of the back scratch as how I would like to have it done to me	1	10	10	2		2	1	1	2	1	This question doesn't apply to me, I don't watch videos like this for ASMR	4	4	4	4
100	2171	1	39	6	it's complicated. female	usa	1	1	2	1	1	1	1	2	1	The host interacts with a variety of objects - accidentally clinks together and purposefully moves around stones and glass beads, makes scratching sounds on a carpet, smoothes out or scratches two towels, taps book covers, etc. She only has brief moments of narration to introduce the objects and then there are a few minutes of just sounds.	2	4	1	5	4	3	4	in her home. can't see much of the setting except for carpet. looks somewhat sunny.	3	1	6	4	3	3	5	7	3	the sounds,colors, different materials, the purposeful movements, the friendliness of her face and voice, the warm atmosphere. But you just said to choose one video there are other very different videos that are effective too.		20	4	1		2	2	2	2		frozen lake and iced over tree - wind sounds, sounds if cracking ice and ice sheets clicking against each other from the waves	4	4	3	7
100	1543	1	41	1		Canada	1	1	1	1	1	1	1	1	1	Haircut with whispering and scissor snipping sounds.	2	2	2	7	6	2	2	Dark room with soft lighting	3	2	6	2	1	4	6	7	3	Soft whispering and gentle scissor noises combined with short, relaxed hand movements.	2	23	20	3	no	2	1	1	2	1	Hair dryer turned on in a bathroom	3	2	3	4
100	1939	1	41	7		UK	1	2	2	2	1	1	2	1	2	Similar to a haircut roleplay but this is a bit more creative the idea being they are putting an experimental paste on your head that is supposed to help with headaches. Always gives me great tingles and helps with headaches. I've been listening to this same video for years.	4	4	4	4	4	4	4	There is no actual visuals in the video but you are imagining it taking place in a spa.	2	1	1	1	4	6	4	7	3	I think as it has lots of noises going on around the head. The element of personal attention is also a trigger and also the ASMRtists voice is a trigger.	3	14	lots going on at same time....but maybe 1-2 minutes with certain actions			1	2	2	2	2	relaxation meditation on the beach	4	1	1	6
100	145048	1	41	7		Netherlands	1	2	3	2	1	1	1	2	1	The host uses a make-up brush and strokes the microphone while almost inaudible whispers.	2	6	1	6	6	3	3	In a living room with paintings in the background and dimmed light.	3	3	3	2	1		3	7	3	The almost inaudible whispers in combination with brushing.	2	40 minutes	25 minutes	4	No	1
100	996	1	42	7		Canada	1	1	3	2	1	1	2	1	2	Spa treatments	1	2	1	7	7	1	2	Soft lights in the background	1	1	2	1	1	4	4	7	4	The woman's accent	4	25				2	2	2	2	2	Forest sounds	4	1	1	7
100	7376	1	42	7		usa	1	2	2	2	1	1	1	2	2	host quietly narrates a story he is drawing	2	5	5	5	5	5	5	totally irrelevant	4	4	6	4	2	4	7	7	3	combo of voice and drawing. hard to pin down what qualities of voice but probably slow, and good...what in music you would call "phrasing"	2	40	40	5	Toni bomboni made it. look him up he's awesome!	2	1	1	2	1	wood pencils	1	2	4	7
100	1957	1	42	7		Canads	1	1	2	2	1	1	1	1	2	The host applies and describes makeup. She has a British accent.	3	4	3	5	4	4	4	It looks like a generic room.	4	3	6	2	3	4	5	6	1	The way the narrator enunciates, her gentleness with touch.	2	55	1- 10 mins	2		2	1	2	2	2	Grocery check out - the scanning of items and packing into bags	4	3	3	6
100	1336	1	43	7		USA	1	2	3	2	1	1	1	2	1	Host is training to give head massage	1	4	4	7	7	1	4	Warm painted walls and massage bed. Head and shoulders of subject getting massage. Arms and hands of person giving massage. Lots of grey soft looking towels.	2	1	6	2	1	4	4	7	3	Calming voice of narrator. I love head massages. I was able to put myself in the place of the subject.	2	28 minutes	I don't know. Triggers overlap		The narrator had a slight European accent. That was very inviting.	2	1	1	1	1	Sounds of brushes again skin and nails	1	2	2	2
100	2869	1	43	1		Usa	1	1	1	2	1	1	1	1	2	Host whispers about how things are going outside, and how safe inside.	4	4	1	5	6	2	4	Inside a dark room. But I usually just listen.	2	2	6	4	3	4	4	4	2	Feels one on one, intimate but completely non sexual.	2	30	15	3	Bit of alturistic mood, helping.	2	1	1	2	2	Thunderstorms. Not violent	4	4	4	5
100	3830	1	43	7		United States of America	1	1	2	2	2	1	2	2	2	The host is given a wet towel shave and head massage by a real life barber.	3	3	2	6	3	2	2	Just your typical Italian barbershop, with a stylist's chair, a mirror, and a counter with various instruments and products used in an average salon.	3	2	2	2	3	4	7	7	4	One of the triggers that I find most compelling to my experience of ASMR is watching someone receive a massage, particularly involving their head. Watching the host receive an after-shave treatment is particularly powerful to me. This one video I've been focusing on for days has a barber setting a warm towel upon the host's head and squeezing it a few times, applying a couple different creams and…	2	20 minutes.	It's not a trigger video but a session in which a service is being rendered.		The type of video is best described as unintentional ASMR, where the host is going for an ASMR response but by having a service performed that is enjoyed by most anyone for its own sake.	2	2	1	2	1	The video host touched the bark of a tree in her backyard with her fingers.	4	2	2	5
100	2051	1	44	7		Ireland	1	1	2	2	1	1	2	1	2	Can be haircut or makeup, or "drawing your face". Also calligraphy, drawing in general.	3	3	1	4	4	2	3	Usually indoors, soft and quiet atmosphere.	2	2	4	4	1	3	4	6	4	Either the personal attention aspect or the ASMRtist's voice.	1	30 mins	N/a - especially for unintentional ASMR			2	1	2	2	1	Drawing/painting masterclass	4	2	2	3
100	1636	1	45	7		United States of America	1	1	3	1	1	1	2	1	2	The host plays a good witch that performs healing on you to return your energy to you.	1	1	1	7	6	1	6	It's in a hut in the woods	1	1	7	1	1	6	1	7	1	Her soft talking and hand movements. I also love the personal attention	1	30	10	2
100	1776	1	45	7		Canada	1	1	3	1	1	1	1	2	1	The host just rambles on in a soft spoken voice about the items she handles during the video.Boxes, lipstick, bowls, fabric, candles etc..	2	5	2	6	6	2	4	Shot up close, in a bedroom type setting. Sofa behind her I think. I believe she's sitting on the floor.	4	2	7	4	2	6	5	7	4	No audio bumps. Steady sound. The noises she makes are at a comfortable level. Handling items that do not have a high pitched "ting" is a bonus.	4	30	5	1	She has an accent as I am Canadian. Not sure if that makes a difference to the experience or not.	2	1	1	1	2	Person receiving a massage.	4	2	2	6
100	1756	1	45	7		USA	1	1	3	1	1	1	1	1	1	clothes pattern on fabric, box of pins, cutting fabric with sharp scissors	1	2	1	7	6	1	3	looks like a tailor shop	3	1	3	1	1	5	4	7	3	the sound of a clothes pattern-the delicate crinkling. Sound of straight pins in a plastic container	2	30-45 iminutes	10 minutes	2	VERY soothing voice with a soft whisper	2	2	2	2	2	walking on small stones	4	6	6	6
99	1699	0	45	2		Us	1	1	3	2	1	1	1	1	1	Asmrtist gives viewer makeover	1	5	1	6	6	1	5	There's a wall behind the person	2	1	3	1	1	3	5	7	1	The sounds of the make up, the kind friendliness of the asmrtist, how much she is concentrating.	4	20	1	1	The combination of whispering, sounds, concentration, and attention is exceptional.
100	1813	1	50	7		USA	1	2	3	1	2	1	1	2	1	The host is tapping various different objects, crinkling things, etc....	1	5	1	7	6	1	4	It's just a simple room. Not ornate or distracting.	3	2	5	3	1	5	6	7	3	It's simple. There is nothing happening that distracts me from the sounds.	2	60?	4 - 5 mins	1	The host is not trying to be "sexy" in any way. He is appropriately dressed, and gives off an attitude of confidence and trustworthiness, like he is not trying to invade your space or anything. He just wants to help you relax.	1	1	1	2	1	I'm thinking of Bob Ross's videos. He was not an ASMRtist. He is giving a lesson on painting.	1	1	1	7
100	3272	1	51	7		United States	1	1	3	1	1	1	2	1	2	The host gives the viewer a facial	2	4	1	6	6	2	4	What one would expect. Soft lighting, neutral colors, accessory items one would expect to find. Staged appropriately	2	1	3	1	1	1	1	7	3	Everything is set to feel safe, welcoming, and comfortable. It follows a predictable script of a familiar experience.	1	45	3 - 5 mins	1	All movement is deliberate, purposeful, and precise. Done with intention. But also gentle, soft, and soothing. Well orchestrated. The host is warm and kind. Looks like they are focused on the viewer and what they are doing	2	1	1	1	1	Cooking breakfast. The focus is on the food and the hands of the host.	1	4	2	6
100	1126	1	51	7		United States	1	1	3	1	2	1	1	2	1	The host does a plastic 3-D puzzle	1	4	2	7	1	4	2	The host uses lighting that focuses mostly on the task at hand, so the background is very dark, the object he's using is well-lit.	4	3	5	2	2	5	6	7	2	I'm not entirely sure, but the combination of the clicking of the plastic pieces he moved around and his slower, more intentional movements worked for me.	2	I don't remember; guessing around 20 - 25 minutes	It's one puzzle, one trigger unless you include movement with sound, then two.								I don't enjoy videos where there isn't a person involved
100	1891	1	53	7		USA	1	1	3	1	1	1	1	2	1	Showing and describing rings (jewelry)	1	2	1	7	3	2	3	Hard to tell-close-up of hands	1	1	7	2	1	6	5	7	4	Soothing tone, fluid hand motions, tapping	4	30 minutes	1	1		1	2	2	2	2	Being outside while it's snowing	1	1	6	7
100	3013	1	53	7		Denmark	1	1	1	1	1	1	1	1	2	12 step facial sap experience.	2	6	2	6	6	2	4	There is a screen much like a divider in a real spa. Colors are golden / sand. A little art. Asian inspired.	2	2	5	2	1	4	3		3	Artists voice. Artists kind and welcoming demeanor. The particular sounds - several of my favorite triggers are in this video - and the hand movements. Certain hand movements are also a trigger for me.	3	2 days, 10:26:00	5 - 7 min.			2	2	1	2	1	Waves crashing on the shore with accompaning relaxing / meditational music. And bird sounds.	4	3	2	7
100	12389	1	53	7		Finland	1	1	2	1	1	1	1	2	2	It's a repeated word video, whispered. I think asmr vocal art would be the best way to discribe it.	2	6	1	6	6	1	4	The host sitting by a table with two microphones and talking/whispering to them, (binaural). Triggers: whispering voice and playing with the word binaurally with different rhyhtms and ways to say it.	2	4	6	3	1	3	5	7	2	Voice. That voice in itself is a trigger for me and the way it is used in that video is just wonderful. And I like the atmosphere, it's relaxed, warm and kind of funny, experimental, creative, artistic and surprising too. For an asmr video it's nicely "normal".	2	20 minutes	20	3	The video maybe? It's Pudding Whispers Repeated Word Check.	1	1	1	2	1	Six different maps, the host is telling about the way they are made and for what purposes, he is not visible, uses a pointer. There is not really any background, maps take the whole screen.	4	4	2	7
100	1001	1	54	3		Canada	1	1	1	2	2	1	2	2	2	slo moving tapping on book, wooden surface or box. Very slow movements	3	4	4	4	5	4	4	a worn out desk and a blue book with a zoom recorder	4	4	4	4	4	4	4	4	4	the tapping... only one that consistently delivered. sadly, user has deleted her account	2	45	10	2		2	1	2	2	1	slow movement of game peices	4	4	4	4
100	1501	1	54	7		UK	1	2	3	3	1	1	1	2	1	quiet talking with tapping and scratching, using phrases like 'you are safe', you are important, 'this is just for you', crinkle sounds, binural, particularly with gaps - pauses, and sometimes in one ear and sometimes in the other.	4	4	4	4	4	4	4	set in a room - but I havent really paid any attention to the setting.	4	4	4	3	3	4	4	4	3	the sounds and the words used.	1	about 25	5	1	its not so much the video - i usually 'watch' with my eyes closed.	1	1	1	1	1	i'm not sure i have non hosted asmr... so difficult to answer these questions.	4	4	4	4
100	1703	1	54	1		U.S.A.	1	2	2	3	1	1	1	2	2	Soft soothing voice and slow hand movements. Hand movements in front of the camera almost as if the hands were touching your face.	2	2	2	7	4	2	3	Night time in small room with relaxing soft lighting.	1	1	7	2	1	3	4	7	4	The gentle hand movements as if having your face caressed and your head massaged. The sound triggers (soft voice and sound of fingers touching face and running through your hair).	2	25 minutes.	20	3	Just very relaxing. Gives me the head tingles and just makes me feel good.	1	1	1	1	1	Ear wax cleaning and ear exam.	4	3	3	2
100	948	1	56	1		USA	1	2	2	1	1	1	1	2	1	The hostess (Bjork) disassembles a TV set while talking about it.	2	4	5	5	3	6	4	A room with a table.	3	3	5	5	3	5	6	6	4	The casual narration; Bjork's voice.	1	4 mins	N/A			2
100	1558	1	57	2		US	1	1	1	1	2	1	2	2	1	The host is scrubbing a board in her kitchen using a scrub brush.	1	6	2	7	7	2	2	Kitchen	2	1	6	1	1	3	7	7	4	I just love the sound of scrubbing and the video is very relaxing. I especially enjoy that there is no talking/whispering. It's 15+ minutes long so I can enjoy it for a longer amount of time.	1	15	15	3	No	2	2	2	2	2	Someone sweeping.	4	3	2	7
100	3590	1	58	7		England	1	1	2	3	1	1	1	1	2	Young woman with gentle Korean accent applies makeup to the "viewer" The ASMRtist makes soft mouth sounds and nods her head	1	1	1	7	5	2	3	Very bland space, could be interpretted as any relevant room for the purpose of the video	1	1	3	1	1	3	4	7	1	Combination of many personal triggers - mouth soundd, hand and head gestures, tapping, personal attention	4	30	None are focused - they are continual throughout			1	1	1	1	1	Towel folding	4	1	1	6
100	848	1	60	7		uk	1	1	2	1	1	1	1	2	1	Towel folding	2	6	2	6	6	2	4	Room with a table and towels	4	4	4	3	3	3	3	6	1	Soft voice and gentle movement of hands	1	30	30	4	Very simple. Not as keen on complicated role play.	2	1	1	2	1	Gift wrapping	1	3	3	4
100	2496	1	60	6	female	USA	1	1	3	2	1	1	1	1	1	packaging dominos as gifts to friends on a cloth covered tabletop. Cutting up colored paper to stuff into boxes, soft spoken.	2	6	4	6	3	3	4	cloth covered tabletop. Cloth is irregular pattern, not smooth. The hands and articles make a sound on the cloth when they touch it. See the hands maneuver the items, looking down from above.	2	3	6	3	2	6	6	7	1	the sound of the dominos clinking, the paper cutting and handling, the tiny box handling, the soft toned speaking, the hands moving on the cloth covered table top.	1	30	?		I don't understand your trigger question above. When I watch this video, I get tingles. Sometimes I'll experience lots of continual waves of them, sometimes just a few. Different every time I watch. I'm guaranteed them if I wait a few months between views. If I have a lot of stress in my mind or if I watch too frequently, I'll receive no tingles.	1	1	1	1	1	Gentlemen's suit fitting	4	2	2	6
100	4476	1	65	7		USA	1	1	3	1	1	1	1	1	1	Hostess gives her friend a manicure, as she speaks softly in Korean from time to time.	1	4	1	7	4	3	2	Not much of the setting shows up in the video. It mostly shows the hostess as she holds up nail polish, etc.	1	2	7	1	1	6	4	7	2	For some reason, I find that when people speak, or whisper, in English that I don't experience ASMR. However, I find I don't mind Korean. The faux nail filing in this video really sets me off.	2	28 min.	10	2		2	1	1	1	1	Towels being flattened and folded	4	1	4	7
									Yes	56							1.8	3.69531	2.10853	5.93798	4.63566	2.63566	3.26923		2.46512	2.03906	4.55814	2.53906	1.72868	3.54331	4.26154	6.73438					1 - 5 minutes	39	38.2353								2.66379	2.55652	4.88696
									No	52							1.1395	1.65623	1.19586	1.26216	1.5042	1.25715	1.17531		1.07866	1.06362	1.84226	1.38577	0.994184	1.38471	1.61985	0.605758					6 - 10 minutes	31	30.3922								1.2522	1.23845	1.85456
									Unsure	22																											11 - 20 minutes	16	15.6863
										130															26	51	9	33	69	10	10	0					21 - 30 minutes	11	10.7843
																									46	39	14	43	37	22	9	0					31 minutes +	5	4.90196
																									31	21	16	20	16	24	19	0
																									24	16	19	19	5	45	33	3					N	102
																									1	1	18	9	0	12	27	2
																									1	0	34	3	2	14	22	21
																									0	0	19	1	0	0	10	102
																								sums	129	128	129	128	129	127	130	128
[truncated: 140 more columns]

## Sheet: Notes and codes
					Congruent Sounds				Misophonia?
					1 = Strongly disagree				Yes	56	43.0769
Trigger time range codes					7 = Strongly agree				No	52	40
1 - 5 minutes	1								Unsure	22	16.9231
6 - 10 minutes	2				Triggers to watch					130
11 - 20 minutes	3				Folding towels	1
21 - 30 minutes	4				Pouring liquid into a glass	2
31 minutes +	5				Folding Origami	3
					(Options for next Q: Yes, Unsure, No. In that order.)
					Then: 1 = no tingles, 7 = most intense I've ever felt
Q66.5 (CODE)										Scottish Triggers
Audio	16	20.7792			Gender					Proximity
Danger	3	3.8961			Het Woman	1				Peripersonal space	1
Lack of personal triggers	21	27.2727			Het Man	2				Within 10 metres	2
Too scripted	22	28.5714			Lesbian	3				Landscape view	3
Camera position	2	2.5974			Gay	4
Wrong tone of voice	9	11.6883			Trans	5
Too much dead air	2	2.5974			I prefer…	6
Deminished response	1	1.2987							Hardware:
Monotony	1	1.2987							1	Yes		Desktop	1
Misophonia count					Object interactions				2	Unsure		Laptop	2
5	77				1 = extremely important				3	No		Smartphone	3
6.49351					7 = not at all important							Tablet	4
												Television	5
												Other	6

## Sheet: Hosted ASMR
Hosted ASMR
Q16	Q17	Q18	Q19	Q20	Q21	Q22_1	Q22_2	Q22_3	Q22_4	Q22_5	Q22_6	Q22_7	Q23	Q25_1	Q25_2	Q25_3	Q25_4	Q25_5	Q25_6	Q25_7	Q25_8	Q42
Is the video narrated? For this section, please recall one of your favourite ASMR videos that is hosted by a person/ASMRtist. Feel free to be as detailed as you like in your answers. Is the video narrated?	Where is the video set?	Is the setting private or public?	Does the video contain roleplay, or a simulated situation (e.g. a haircut)?	Is the video focused on an object?	Briefly describe the contents of the video (e.g. "The host gives the viewer a haircut")	Please rate the appearance of the physical environment - Clean	Please rate the appearance of the physical environment - Intricate	Please rate the appearance of the physical environment - Welcoming	Please rate the appearance of the physical environment - Untidy	Please rate the appearance of the physical environment - Bright colours	Please rate the appearance of the physical environment - Warm-looking	Please rate the appearance of the physical environment - Modern	Please briefly describe the physical setting of the video	How would you rate the atmosphere of the video? - Happy	How would you rate the atmosphere of the video? - Inviting	How would you rate the atmosphere of the video? - Clinical	How would you rate the atmosphere of the video? - Organised	How would you rate the atmosphere of the video? - Relaxed	How would you rate the atmosphere of the video? - Predicatable	How would you rate the atmosphere of the video? - Scripted	How would you rate the atmosphere of the video? - Dangerous	Does the video have a solid colour background?
1	1	1	2	1	The host makes candles and narrates it	1	1	2	7	5	1	4	A softly lit room with fairy light (bokeh) in the background	2	2	7	4	1	4	5	7	4
2	1	1	1	1	Can't remember the specific one	1	6	2	7	3	3	3	At a table in a living room or kitchen	4	2	5	3	2	3	2	7	1
1	1	2	1	2	Physical examination	1	2	1	7	3	1	2	Physiotherapist's clinic (roleplay).	1	1	2	1	1	2	3	7	3
1	1	1	2	2	The host explains Chinese paintbrushes, various tea flavors, gives life advice, and tells stories about her childhood.	4	4	4	3	4	3	4	Usually footage of her desk with a teapot and teacup or art supplies. She might be drawing or painting.	2	4	6	4	1	6	7	7	4
1	1	1	1	1	The host shows viewer different items	2	4	2	6	5	3	3	Tidy, simple and ratet steril	4	2	2	2	3	2	2	6	3
2	1	1	2	1	Plastic foil on a mic getting touched.	1	4	4	7	4	4	3	Women touching plastic foil on a mic.	3	3	6	6	4	4	4	7	4
1	1	1	1	2	Host is dentist doing teeth cleaning	1	1	4	7	6	6	1	Dentists office - cold lights and modern look but still relaxing to me for some reason	4	4	1	1	6	5	1	5	4
2	1	1	1	1	One of the girls plays with another girls hair (brushing, fingers through hair) and scratching her head and back	1	2	1	6	1	1	1	Indoors, in one of the girls bedrooms. Can see shoes on shelves	2	1	4	2	1	2	4	7	4
1	1	1	1	2	The viewer is given a haircut while the hosts speaks in a relaxed, conversational manner.	1	4	1	7	4	1	3	Not sure. I'm blind so can't explain. It was a hair cut sound slice from Heather feather.	1	1	7	2	1	4	5	7	2
1	1	1	1	2	The host gives another person a head massage.	1	1	1	7	2	2	4	There is not much visible of the setting because the static camera focuses on the hands and the head, so the background is blurred. But in other videos the background can be seen as a tidy and welcoming living room of a typical student.	3	3	7	6	1	1	1	7	4
1	1	1	2	2	Woman having her hair played with and brushed, with a head massage	4	5	5	2	3	4	4	Someone's living room	5	5	7	5	3	4	5	7	4
1	1	1	1	2	The host gives the viewer personal attention during a Cranial Nerve Exam	1	2	1	7	7	2	3	Room with blank walls with medical posters, a desk used for reception, a pointer used for exams	1	1	3	1	1	3	2	7	1
1	1	1	1	2	The host examines and cleans the viewer's ears.	1	4	2	7	7	2	1	Appears like a welcoming, but professional medical office setting.	4	2	1	2	2	1	3	7	4
1	1	1	2	2	The host whispers, not inaudible whispers but not soft	2	3	2	4	3	4	4	Small room with good illumination maybe because of bright coloured walls	2	3	4	2	2	3	5	6	4
1	1	1	2	2	The host is caring and nurturing atention to the viewer. The host feels geniune and wants to soothe the viewer. The host shows a range of products to also relax the viewer.	2	4	2	6	4	2	2	I am not so familiar with the phyisical setting since the host is the part I focus on. I am looking up the video now to see what the physical setting is. There is just the face and shoulders and arms of the host and a beige wall behind her. No embellishments or anything noticeable.	4	2	6	3	1	4	6	7	3
1	1	1	1	2	Host gives viewers spa treatments	1	2	1	6	3	2	4	Yellow wall with some brachytherapy decor and a blue light coming through a window	2	1	7	3	1	4	4	7	3
1	1	2	1	1	The video I'm watching now is a librarian setting someone up with a library card. Lots of typing on keyboards, tapping on books, etc.	1	3	2	7	4	2	3	The setting is in front of a backdrop that has bookshelves on it to look like a library. The woman is dressed in a business casual bright red outfit. Professional looking.	1	1	6	1	1	4	4	7	4
1	1	2	2	1	Whispering/Soft Spoken, Reading/Reviewing Comic Books, Page Turns	1	7	1	7	3	1	3	Top down view on a wooden table, clean and well-kept comic books	2	1	7	1	1	1	6	7	4
1	1	1	1	2	The host gives the viewer an eye exam	2	6	4	6	7	3	4	A plain room. Whote/cream walls.	4	3	3	3	2	3	5	7	1
1	1	1	1	2	The host gives a "spa" experience and blows gently from ear to ear with smoke, as well as lots of very soft whispering and hand movements	1	4	2	6	6	2	4	A soft neutral backdrop	3	2	4	3	1	4	3	7	1
1	1	1	1	2	Assorted popular ASMR triggers	4	4	2	4	3	3	3	Apartment, drawn curtains	3	3	4	4	3	4	5	7	4
1	1	1	2	1	The ASMRtist teaches us how to fold towels in fancy ways, very, very slowly.	1	5	3	6	4	3	2	The video focuses on Maria's hands folding bright white soft towels on a shiny black table, with a yellow wall and geometric wall art shown in the background and reflected on the table. Maria's nails are painted a glossy dark pink. Maria is wearing just regular clothes, all we can see are her jeans, her wristwatch, and the sleeves of her shirt.	2	1	3	1	2	1	5	7	3
1	1	1	1	1	YouTuber Karina Satori's hair cut video. I especially like the part where there is a comb or fingers very close moving near my face	2	4	2	5	3	2	2	It is hard to see a lot of background she is so close. But she is on a couch with pillows. Her sweater is more focused on. Mostly muted colors except her comb is bright purple	1	1	7	2	1	1	4	7	4
1	1	1	1	1	The host makes a drawing of the viewer while describing her actions.	4	6	1	6	6	1	5	The host's bedroom. It's a clean, minimalistic and somewhat old-fashioned bedroom.	3	1	4	4	1	4	5	7	4
1	1	1	1	1	The host touches the viewer's face, cleans the face, puts on makeup.	1	6	1	7	6	1	1	Very simple, light colored background	2	1	5	2	1	2	5	7	1
2	1	1	2	1	(I don't have ONE favorite video, but in general) sounds are made with an object	1	3	2	6	5	3	3	A close up of the object making the noises / the object and the microphone	3	1	7	2	1	4	3	7	1
2	1	1	2	2	Host taps on white balance card and talks about the sound of rain	1	6	4	7	6	3	4	An off white wall	2	3	6	1	1	4	3	7	1
1	1	1	2	1	Tapping a variety of objects close to mic	2	3	2	5	5	3	3	Sitting in her room, neutral Colors, tapping..	2	2	4	3	1	4	5	7	3
1	1	1	2	1	The host walks through a recipe book and talks about her favorite recipes.	1	3	1	7	6	1	4	The video is a closeup on the book and hands of the host turning through the pages. The book is Ina table with a small candle or 2 near it.	2	1	6	3	1	6	5	7	4
1	1	1	2	1	Discussing everyday objects	2	3	1	6	2	1	4	Warm, safe, welcoming, familiar	1	1	6	1	1	2	3	7	4
1	1	1	2	2	Inaudible Ear to Ear + Blowing in the Microphone + Whispering in Polish	4	4	4	4	6	2	4	Camera holds extended single shot of womans collarbone in button-up shirt as she rotates around mic with green-screen of blossoming tree in background.	4	4	6	4	2	2	4	6	4
1	1	1	1	2	The hostess checks me in at a hotel and talks about some of the things to do in the area	1	2	1	7	3	2	3	Simple backdrop with a curtain or wall-paper with flowers. Good lighting, and close up picture of the hostess.	2	1	3	2	2	3	1	7	4
1	1	1	1	2	The host roleplays as a flight attendant.	1	4	3	6	4	4	4	The flight attendant is wearing a blue uniform, there is a black curtain behind her that takes up the whole frame. There are other seats around, but they are not really visible. The primary point of view would be one of a passenger in a plane.	2	2	6	3	3	3	2	7	2
1	1	1	1	2	Follow the light	2	5	2	5	6	3	4	Indoors in front of a curtain	2	2	2	2	2	1	5	7	3
1	1	2	2	2	Whispered facts about outer space.	1	4	1	7	3	1	3	In a room with leather chairs and mic showing at the bottom of the screen.	1	1	1	1	1	4	7	7	4
1	1	1	1	2	futuristic travel agent	1	1	2	7	7	1	1	a green screen with a logo in the background and warm light coming from an indirect source	2	1	3	1	2	5	5	7	4
1	1	1	2	1	The host carefully shows a collection of something, usually made from paper (for example, magazines), quietly whispering over the top. Host usually makes gentle hand movements and creates noises with the paper (for example, crinkling, or folding)	3	4	4	4	4	4	4	Indoors in a quiet setting	3	3	5	5	2	5	5	6	4
1	1	1	2	1	ASMRtist showing cards and journals while tapping on them and crinkling the packaging. Whispering and soft spoken and slow hand movementa	1	1	1	7	5	1	4	Library backdrop and a artist sitting at a table	4	1	6	1	1	4	4	7	4
2	1	2	2	2	Indian head massage	6	3	6	1	2	2	7	Indian Barber shop. Untidy and not that clean.	4	2	6	6	1	5	6	7	4
1	1	1	1	2	The host gives the viewer a beard trim.	3	4	3	5	4	2	3	Set in what appears to be a bedroom but most details are blurred.	3	2	5	5	2	3	4	6	4
1	1	1	1	2	The host gives the viewer personal attention, waves their hands slowly and in a low voice, narrates the video.	1	5	1	6	6	3	5	An apartment, or some type of residence.	2	1	5	4	1	6	7	7	4
1	1	1	1	2	Host gives viewer a medical exam	2	6	3	6	2	3	3	It's a close up on host with only viewable background being a poster/wallpaper in black & white with a line of phone booths falling like dominoes. They're each a different color of the rainbow.	3	2	3	3	2	5	3	6	4
1	1	1	1	2	Host does make up	2	2	2	6	6	2	3	In a bedroom i believe	2	2	6	2	2	3	6	7	4
1	1	1	1	2	Role play of being taken care of, head massage, host is very attentive and soft spoken.	3	6	2	6	6	2	4	cant see much of the background as the host is up close to camera	2	2	6	4	2	4	6	7	4
1	1	1	1	2	The host performs an eye examination/medical examination	2	6	1	7	6	2	4	Black background. Indoors	2	3	2	2	1	4	2	7	2
1	1	1	1	2	The host treats the viewer to a facial spa treatment.	1	4	1	7	4	1	4	Set up as if you are seated in a reclining chair, looking at a colorful sign that says, "Spa". You can't see much else besides the host, otherwise.	1	1	4	1	1	4	1	7	4
2	1	2	2	1	short video about manufacturing Leica camera, its bag & details.	2	6	4	6	3	4	4	a factory, but zoomed toobject, cant see much.	4	4	4	1	2	6	6	6	4
1	2	1	1	2	Riding in front seat of car on office lunch break	4	4	3	4	4	4	3	POV of front passenger seat of car	3	4	5	5	2	2	3	5	4
1	1	1	1	1	The host shows the viewer pages from various coffee table books.	2	2	2	6	5	2	4	A traditional library looking background.	3	3	4	2	2	2	6	7	4
1	1	1	1	2	I cannot watch one particular video multiple times in a row and still produce the same effect. Although I can return to specific content again for response at later date. Favorites include "Realistic Barber Role......Cosmic Tingles ASMR.	1	2	1	6	4	2	4	Made to look similar to barbershop with mirror, chairs, and towels/small items on some shelves	2	1	3	2	1	4	4	6	4
1	1	2	1	2	The host gives the viewer a spa treatment including a face mask, a head and neck massage and hairbrushing accompanied by softly spoken narration and positive affirmations. Part of the video is performed in the dark with a bright light used to perform some skin extractions.	2	2	1	6	5	3	2	Looking at a wall with a sheer material cover with a few wooden style decorations. Part of the video is spent looking at the ceiling, which is plain and light coloured. The whole video has a neutral colour overall.	3	1	5	2	1	5	5	7	4
1	1	1	1	2	Host (sitting at a desk) registers the viewer into a database by asking them questions and entering the data into a computer.	1	3	2	7	5	6	2	â€¢ Small, artificially lit patient exam room (office/hospital ceiling tube lights). â€¢Sterile/medical setting. â€¢Some non-threatening medical equipment and medical hand tools). â€¢No loud extraneous noises (some nearly inaudible, unintentionally ambient, electrical/mechanical humming/buzzing/clicking/whirring that does not detract or distract from situation). â€¢ "Emotionally Neutral" (ie: giv…	4	3	1	2	4	2	1	7	4
1	1	1	1	1	A salesperson shows different candies and describes them, then packs them in to bag for a party.	1	7	4	7	7	4	2	All black. Black walls, black table. The background is meant to be completely non-distracting from the objects being shown.	2	3	1	1	1	2	1	6	2
1	1	1	1	2	the host tries on clothes on the viewer	1	2	3	3	4	4	4	a clothes shop	3	3	2	5	4	5	4	6	4
1	1	1	1	1	The host(ess) pretends to sell the viewer cosmetic products.	1	3	2	6	4	3	2	Inside a home.	2	1	7	2	1	6	7	7	1
2	1	1	1	1	Host cleans a keyboard	1	1	1	7	4	1	4	Just a focus on the keyboard and the utensils and products being used to clean it	1	1	4	1	1	4	4	7	4
2	1	1	2	1	Chiropractic exam	1	4	2	7	7	4	4	Typical doctors office	2	2	1	1	1	2	3	7	1
1	1	1	1	2	All sorts of personal attention such as a haircut, spa treatment, massage, make-up application and so forth	1	3	1	6	4	3	2		2	1	3	2	1	4	2	7	4
2	1	1	1	2	It's of a girl giving a man a face massage with very detailed and repetitive movements	1	7	4	7	7	4	3	It's quite close up so no real background I think the wall behind is painted white	4	2	1	1	3	1	7	7	1
1	1	1	1	1	The host is whispering to and "touching" viewers face, hair, playing with different objects and their sounds- variety of noises	1	4	3	7	4	2	3	Very plain - host, table, ear shaped microphone, and nothing on walls or anything.	3	3	2	3	3	4	3	7	4
1	1	1	1	2	The host gives the viewer an argan oil hair treatment, scalp massage, and hair brushing while they and the viewer sit in a darkened room lit by a fire and candles.	1	3	1	6	6	1	3	The video is a close up of the host's face with a wall and candles visible in the background. She is lit from the side by the fire.	1	1	7	2	1	2	3	7	1
1	1	1	1	2	The host is selling handbags in a qvc style manner.	1	1	1	7	7	3	2	The lighting isn't too bright, white background her clothing isn't overwhelming.	1	1	5	1	1	4	1	7	1
1	1	1	1	1	The host gives the viewer an eye exam	1	5	3	6	5	4	2	Office type room	4	3	2	2	3	2	3	7	4
1	1	1	2	1	Done by Gentle Whispering called Simple Pleasures. I rarely watch the video, just audio. This is mainly due to the fact that I want to sleep and do not want the light from the screen to keep me awake. Marina's soft spoken voice triggers me. Videos where she is wearing a crinkly shirt trigger me best. Also when she brushes hair (sound).	2	6	2	6	4	4	4	Simple backdrop. Can't remember color. Focus is more on Maria than enviorment.	3	2	2	2	2	2	4	7	1
1	1	1	2	2	Inaudible close up whispering	1	4	4	6	6	3	4	Bedroom	2	3	6	4	2	4	4	7	1
1	1	1	2	1	Maria from Gentlewhispering on youtube recently released a video where she provides intructions on the proper way to iron clothes. She uses a soft spoken narative and its very quiet and soothing and the noises are a bit repetitive which is heaven. Takes me back to being a kid watching my mom iron.	1	5	1	6	5	3	4	A close up of her ironing board in her bedroom. You only see her hands through 90% of the video	2	1	6	2	2	3	4	7	4
2	1	1	2	1	Person is eating with a natural form of lip smacking, not exaggerated. They are gently handling the food using chopsticks and gently unwrapping food in package.	1	4	1	7	3	2	2	Simple. Wood table and place setting up close to the camera. Van Gogh painting in the background.	3	2	6	2	1	4	4	7	4
1	1	1	2	2	The host uses a unique microphone setup (3Dio binaural microphone on one side, a single mic on the other) to produce highly sensitive sounds with a remarkable echo effect. Uses a number of items to produce sounds, primarily tapping, and also speaks into the microphones.	1	2	2	6	3	4	1	The host is visible from the chest up in comfortable clothes, facing the camera. The microphones are on either side of the host. The background is a digital image of black and blue cubes created using a green screen.	3	2	2	1	3	3	6	7	4
1	1	1	1	2	The host uses aromas, colors, water sprays and whispering to balance the chakras of the viewer.	3	4	2	5	2	2	3	Black background, colored circles, some flowers.	3	2	6	5	2	1	4	7	2
1	1	1	1	2	Scalp massage with narrator	4	4	4	2	7	2	6	Average living room	4	4	7	7	1	4	7	7	4
1	1	2	1	2	A man opens an essential oil diffuser and demonstrates it. Also, Ally Maque host a customer in a candy shop. Amazing.	1	2	2	7	2	2	2	1. in the man's home. 2. in an imaginary candy shop	2	1	4	2	2	4	6	7	4
1	1	1	1	2	The host is massaging the viewer's head	4	4	1	4	4	3	3	Just a plain room	1	1	5	4	2	2	6	6	3
2	1	1	2	1	A woman with very long nails tapping on a box and then making rustling noises with the contents of the box.	3	5	2	5	4	3	4	I'm not sure. Looks like a bedroom. The woman is sitting at a table. I don't recall much about the background. There's natural light though, I think, coming from a window.	3	2	6	4	1	4	5	6	4
1	1	1	1	2	The host does makeup and hair to the viewer	5	2	1	4	3	1	5	Lots of posters on the back wall, camera is on a table, she's seen only from chest up, she speaks softly and moves her hands as she speaks, takes objects and shows them to the viewer describing how it's gonna work. She has big eyes and rings on her fingers.	3	1	6	5	1	3	5	7	4
1	1	2	2	1	Female discuses and goes through the process of cleaning, filling, and smoking a pipe.	1	2	2	7	5	3	3	The video appears to be filmed in the host's kitchen, while she's seated at a table.	3	2	7	2	2	2	4	7	4
1	1	1	2	2	The person explains/instructs how to do something.	2	4	2	6	4	3	3	office or workshop	2	2	6	2	2	4	6	6	4
1	1	1	2	2	The video I was picturing is one that always comes to mind and was one of the very first i ever came across. It was of MalASMR on YouTube at work, recording 15 minutes or so of her doing mainly administrative tasks. At one point she picks up a sealed plastic bag of stationery and begins to crinkle it in front of the camera. The sounds and the ambiance of the office were enough to trigger the phen…	4	4	4	4	4	4	4	In an office.	2	2	4	3	2	4	6	7	4
1	1	1	2	1	Someone makes sounds with certain items	2	4	3	6	6	2	3		3	2	6	4	2	4	4	7	3
2	1	1	2	1	Someone turning pages in a book and a magazine	2	6	2	6	4	3	4	Just focused on the book pages	4	4	4	3	3	3	5	6	3
1	1	1	1	1	The host talks gibberish and with an accent. He does repetitive tasks and makes things.	2	3	1	6	2	2	2	Work desk with a green screen background of a lab.	2	2	5	2	2	5	3	6	4
1	1	1	1	2	The host gives the viewer an eye test	1	1	2	7	6	5	2	Optician's room so medical style but private.	4	4	3	2	2	2	4	7	4
1	1	1	1	1	Host demonstrates books to viewer.	1	6	2	7	4	3	4	Indoors, table with host sitting opposite viewer. No props other than books and a small handwritten sign on wall.	2	2	5	1	2	4	3	7	1
1	1	1	1	1	Facial massage tutorial	1	6	2	6	5	3	2	Make up studio	2	2	2	2	1	2	2	7	1
1	1	1	2	1	The host opens a bath bomb kit and makes bath bombs	1	5	2	7	6	3	5	Sitting at at a table	3	3	5	2	1	2	5	7	1
1	1	1	2	1	The host is tapping, scratching microphone and whispering	1	2	1	6	5	1	1	Very little detail in the room, white wall	1	1	7	1	1	1	5	7	1
1	1	2	2	2	The host eats crunchy food and whispers	1	2	1	6	5	2	4	In a room with bare furnishings	1	1	6	4	1	3	6	6	1
2	1	1	1	2	The artist is fixing up the users head.	1	4	1	7	6	4	2	There is little setting to it. It's a blank background. The angle is so tight you mostly see the artist face.	1	1	2	4	1	3	3	7	1
1	1	1	2	1	Rubbing, brushing the microphones	1	6	2	6	6	2	4	Black background, asmrtist on screen seated. View from chest to nose (top of head not visible), hand gestures prominent	1	1	6	3	1	3	6	7	2
1	1	1	1	2	The host is fitting the viewer for a suit. My 2nd favorite is one depicting the host giving the viewer a haircut and shave.	1	4	1	7	4	2	4	A living-room meant to portray the host's suit store/barbershop.	2	2	6	2	1	2	4	7	4
2	1	1	1	2	Skin analysis/spa treatment	1	2	1	6	3	2	2	Soft lighting in a staged spa setting using real props rather than a video backdrop/green screen	2	1	3	2	1	6	4	7	4
1	1	1	1	2	Gentlewhispering Flight Attendant simulation.	1	2	1	7	7	2	5	Simulated airplane seat with aisle.	1	1	5	1	1	2	2	7	2
1	1	1	2	2	It's a tutorial on how to sew a costume. Details on measuring, cutting, folding etc.	4	1	4	4	4	4	4	Girl in her room, close up videos of her desk and sewing machine. Various lighting.	3	4	5	5	2	6	4	7	4
1	1	1	1	2	host gives viewer a medical checkup	1	2	1	7	4	3	2	doctors office	1	2	2	2	1	3	2	7	4
2	1	1	2	1	The host scratches a friends back. ASMR videos usually do NOT work for me if I can see either the host or models faces.	2	6	4	6	6	4	4	Camera focused on the back of the person receiving the back scratch, only a few peripheral items visible in room	4	4	3	3	2	2	6	7	1
1	1	1	2	1	The host interacts with a variety of objects - accidentally clinks together and purposefully moves around stones and glass beads, makes scratching sounds on a carpet, smoothes out or scratches two towels, taps book covers, etc. She only has brief moments of narration to introduce the objects and then there are a few minutes of just sounds.	2	4	1	5	4	3	4	in her home. can't see much of the setting except for carpet. looks somewhat sunny.	3	1	6	4	3	3	5	7	3
1	1	1	1	1	Haircut with whispering and scissor snipping sounds.	2	2	2	7	6	2	2	Dark room with soft lighting	3	2	6	2	1	4	6	7	3
1	1	2	1	2	Similar to a haircut roleplay but this is a bit more creative the idea being they are putting an experimental paste on your head that is supposed to help with headaches. Always gives me great tingles and helps with headaches. I've been listening to this same video for years.	4	4	4	4	4	4	4	There is no actual visuals in the video but you are imagining it taking place in a spa.	2	1	1	1	4	6	4	7	3
1	1	2	1	2	Spa treatments	1	2	1	7	7	1	2	Soft lights in the background	1	1	2	1	1	4	4	7	4
1	1	1	2	2	host quietly narrates a story he is drawing	2	5	5	5	5	5	5	totally irrelevant	4	4	6	4	2	4	7	7	3
1	1	1	1	2	The host applies and describes makeup. She has a British accent.	3	4	3	5	4	4	4	It looks like a generic room.	4	3	6	2	3	4	5	6	1
1	1	1	2	1	Host is training to give head massage	1	4	4	7	7	1	4	Warm painted walls and massage bed. Head and shoulders of subject getting massage. Arms and hands of person giving massage. Lots of grey soft looking towels.	2	1	6	2	1	4	4	7	3
1	1	1	1	2	Host whispers about how things are going outside, and how safe inside.	4	4	1	5	6	2	4	Inside a dark room. But I usually just listen.	2	2	6	4	3	4	4	4	2
2	1	2	2	2	The host is given a wet towel shave and head massage by a real life barber.	3	3	2	6	3	2	2	Just your typical Italian barbershop, with a stylist's chair, a mirror, and a counter with various instruments and products used in an average salon.	3	2	2	2	3	4	7	7	4
1	1	2	1	2	Can be haircut or makeup, or "drawing your face". Also calligraphy, drawing in general.	3	3	1	4	4	2	3	Usually indoors, soft and quiet atmosphere.	2	2	4	4	1	3	4	6	4
1	1	2	1	2	The host plays a good witch that performs healing on you to return your energy to you.	1	1	1	7	6	1	6	It's in a hut in the woods	1	1	7	1	1	6	1	7	1
1	1	1	2	1	The host just rambles on in a soft spoken voice about the items she handles during the video.Boxes, lipstick, bowls, fabric, candles etc..	2	5	2	6	6	2	4	Shot up close, in a bedroom type setting. Sofa behind her I think. I believe she's sitting on the floor.	4	2	7	4	2	6	5	7	4
1	1	1	1	1	clothes pattern on fabric, box of pins, cutting fabric with sharp scissors	1	2	1	7	6	1	3	looks like a tailor shop	3	1	3	1	1	5	4	7	3
1	1	1	1	1	Asmrtist gives viewer makeover	1	5	1	6	6	1	5	There's a wall behind the person	2	1	3	1	1	3	5	7	1
2	1	1	2	1	The host is tapping various different objects, crinkling things, etc....	1	5	1	7	6	1	4	It's just a simple room. Not ornate or distracting.	3	2	5	3	1	5	6	7	3
1	1	2	1	2	The host gives the viewer a facial	2	4	1	6	6	2	4	What one would expect. Soft lighting, neutral colors, accessory items one would expect to find. Staged appropriately	2	1	3	1	1	1	1	7	3
2	1	1	2	1	The host does a plastic 3-D puzzle	1	4	2	7	1	4	2	The host uses lighting that focuses mostly on the task at hand, so the background is very dark, the object he's using is well-lit.	4	3	5	2	2	5	6	7	2
1	1	1	2	1	Showing and describing rings (jewelry)	1	2	1	7	3	2	3	Hard to tell-close-up of hands	1	1	7	2	1	6	5	7	4
1	1	1	2	2	It's a repeated word video, whispered. I think asmr vocal art would be the best way to discribe it.	2	6	1	6	6	1	4	The host sitting by a table with two microphones and talking/whispering to them, (binaural). Triggers: whispering voice and playing with the word binaurally with different rhyhtms and ways to say it.	2	4	6	3	1	3	5	7	2
2	1	2	2	2	slo moving tapping on book, wooden surface or box. Very slow movements	3	4	4	4	5	4	4	a worn out desk and a blue book with a zoom recorder	4	4	4	4	4	4	4	4	4
1	1	1	2	1	quiet talking with tapping and scratching, using phrases like 'you are safe', you are important, 'this is just for you', crinkle sounds, binural, particularly with gaps - pauses, and sometimes in one ear and sometimes in the other.	4	4	4	4	4	4	4	set in a room - but I havent really paid any attention to the setting.	4	4	4	3	3	4	4	4	3
1	1	1	2	2	Soft soothing voice and slow hand movements. Hand movements in front of the camera almost as if the hands were touching your face.	2	2	2	7	4	2	3	Night time in small room with relaxing soft lighting.	1	1	7	2	1	3	4	7	4
1	1	1	2	1	The hostess (Bjork) disassembles a TV set while talking about it.	2	4	5	5	3	6	4	A room with a table.	3	3	5	5	3	5	6	6	4
2	1	2	2	1	The host is scrubbing a board in her kitchen using a scrub brush.	1	6	2	7	7	2	2	Kitchen	2	1	6	1	1	3	7	7	4
1	1	1	1	2	Young woman with gentle Korean accent applies makeup to the "viewer" The ASMRtist makes soft mouth sounds and nods her head	1	1	1	7	5	2	3	Very bland space, could be interpretted as any relevant room for the purpose of the video	1	1	3	1	1	3	4	7	1
1	1	1	2	1	Towel folding	2	6	2	6	6	2	4	Room with a table and towels	4	4	4	3	3	3	3	6	1
1	1	1	1	1	packaging dominos as gifts to friends on a cloth covered tabletop. Cutting up colored paper to stuff into boxes, soft spoken.	2	6	4	6	3	3	4	cloth covered tabletop. Cloth is irregular pattern, not smooth. The hands and articles make a sound on the cloth when they touch it. See the hands maneuver the items, looking down from above.	2	3	6	3	2	6	6	7	1
1	1	1	1	1	Hostess gives her friend a manicure, as she speaks softly in Korean from time to time.	1	4	1	7	4	3	2	Not much of the setting shows up in the video. It mostly shows the hostess as she holds up nail polish, etc.	1	2	7	1	1	6	4	7	2
						1.78689	3.70492	2.12295	5.94262	4.63115	2.57377	3.29508		2.46721	2.03279	4.57377	2.57377	1.72131	3.5082	4.2623	6.72951
						1.10312	1.60271	1.21181	1.23673	1.48876	1.1868	1.12853		1.04163	1.06305	1.84177	1.40209	0.934426	1.39228	1.59817	0.614535
						68	11	48	1	2	24	7		24	49	8	31	64	10	9	0
						30	24	40	2	7	40	25		43	37	14	40	36	22	9	0
						9	14	10	2	19	30	29		30	20	15	19	16	24	16	0
						13	39	20	13	34	23	51		24	15	17	19	5	41	33	3
						1	12	3	11	17	2	7		1	1	17	9	0	12	26	2
						1	19	1	44	30	3	2		0	0	33	3	1	13	20	20
						0	3	0	49	13	0	1		0	0	18	1	0	0	9	97
						122	122	122	122	122	122	122	sums	122	122	122	122	122	122	122	122
														The above as %s
														19.6721	40.1639	6.55738	25.4098	52.459	8.19672	7.37705	0
														35.2459	30.3279	11.4754	32.7869	29.5082	18.0328	7.37705	0
														24.5902	16.3934	12.2951	15.5738	13.1148	19.6721	13.1148	0
														19.6721	12.2951	13.9344	15.5738	4.09836	33.6066	27.0492	2.45902
														0.819672	0.819672	13.9344	7.37705	0	9.83607	21.3115	1.63934
														0	0	27.0492	2.45902	0.819672	10.6557	16.3934	16.3934
														0	0	14.7541	0.819672	0	0	7.37705	79.5082

## Sheet: NonHosted ASMR
Non-hosted/Abstract ASMR videos
Q33	Q34	Q35	Q36	Q37	Q46	Q47_1	Q47_2	Q47_3	Q47_4	Q47_5	Q47_6	Q47_7	Q47_8
Is the video narrated?	Where is the video set?	Is the setting private or public?	Does the video contain roleplay, or a simulated situation (e.g. a haircut)?	Is the video focused on an object?	Does the video have a solid colour background?	How would you rate the atmosphere of the video? - Happy	How would you rate the atmosphere of the video? - Inviting	How would you rate the atmosphere of the video? - Clinical	How would you rate the atmosphere of the video? - Organised	How would you rate the atmosphere of the video? - Relaxed	How would you rate the atmosphere of the video? - Predicatable	How would you rate the atmosphere of the video? - Scripted	How would you rate the atmosphere of the video? - Dangerous
2	1	1	2	1	2	3	2	5	3	2	3	6	7
2	2	1	1	2	4	1	1	7	5	1	2	4	6
2	1	2	2	2	2	2	2	7	2	1	2	3	7
1	1	2	2	1	4	2	2	2	2	1	5	7	7
2	1	1	1	2	1	1	2	4	3	2	3	5	6
1	1	1	1	1	2	4	4	1	4	1	1	4	7
2	1	1	2	1	2	4	4	3	4	1	4	7	7
2	1	1	2	1	4	5	5	3	3	3	3	6	7
2	1	1	2	1	3	2	2	5	4	2	4	5	7
2	1	1	2	1	2	4	3	7	2	1	3	3	7
1	1	1	2	1	4	4	3	4	2	2	3	6	6
1	1	1	2	1	2	1	2	6	3	2	3	6	7
1	1	1	2	1	4	1	1	7	3	2	4	4	7
2	2	2	2	1	4	3	3	6	4	4	4	6	7
1	1	2	2	1	4	1	1	7	2	1	2	7	7
2	1	1	2	1	3	4	4	1	2	4	2	4	7
2	2	2	1	2	4	4	2	2	2	2	2	1	7
1	1	1	2	1	4	2	3	6	4	3	6	4	7
1	1	1	2	1	4	4	3	4	3	3	3	5	7
2	2	2	2	2	4	4	3	6	7	3	3	7	6
1	1	1	2	1	4	1	1	7	2	1	1	3	7
2	1	1	2	1	1	3	3	2	1	4	1	1	7
1	1	1	2	1	2	2	2	6	1	1	2	3	7
1	1	1	2	1	4	4	4	3	3	5	5	4	4
2	2	1	2	2	4	4	4	7	7	2	6	6	7
1	1	1	2	1	3	2	2	4	1	2	2	3	7
1	1	1	2	2	4	4	2	7	5	5	7	3	5
1	1	1	2	2	4	3	1	2	3	3	4	6	7
2	2	2	2	2	4	2	3	6	6	1	1	6	6
2	1	2	2	2	4	4	4	4	4	4	4	4	4
1	1	1	2	1	2	2	2	3	3	1	1	3	7
2	1	2	2	1	4	3	3	3	2	4	4	4	6
2	1	1	2	1	1	3	3	3	3	3	3	5	7
1	1	1	2	1	4	1	1	1	1	1	1	1	7
2	1	1	2	2	4	2	1	2	1	1	2	7	7
2	1	1	1	1	4	4	4	4	4	2	4	4	6
1	2	1	2	2	4	4	1	7	4	4	4	7	7
2	1	2	1	1	4	6	6	6	2	2	1	1	7
2	2	2	2	2	4	5	4	6	7	1	6	6	4
2	1	1	2	1	1	4	4	3	2	2	6	3	7
2	2	2	2	2	4	1	1	4	2	1	2	3	6
1	1	1	2	1	4	2	2	6	5	2	3	5	6
2	1	1	2	1	4	2	2	3	2	2	2	6	6
1	1	1	2	1	2	3	2	5	3	1	2	5	7
2	1	2	2	2	4	4	4	4	4	4	4	4	4
1	1	1	2	2	4	1	1	7	1	1	4	4	7
2	1	1	2	1	4	3	2	6	2	2	5	5	7
2	1	1	2	1	4	4	4	3	4	3	3	4	6
1	1	1	2	1	4	3	3	5	2	2	5	6	7
2	1	1	2	1	1	4	3	3	3	2	4	4	6
1	1	1	2	1	4	3	3	7	3	2	6	6	7
2	1	1	2	1	4	4	4	5	4	2	2	4	7
2	1	1	2	1	2	4	4	1	1	4	3	3	7
2	1	1	2	1	2	4	4	1	2	4	2	4	7
1	1	1	1	1	4	1	1	4	1	1	4	4	7
2	1	1	2	1	1	1	1	4	1	2	2	7	7
1	1	1	2	1	3	1	1	7	7	1	7	7	7
2	1	1	2	1	4	2	1	6	3	1	4	5	7
2	1	1	2	1	2	1	3	7	6	1	1	6	7
2	1	2	2	2	4	2	2	6	6	2	2	5	7
1	2	2	1	1	4	1	1	7	4	2	3	2	7
2	1	2	2	2	4	2	4	4	4	4	6	4	7
2	2	2	2	2	4	1	1	7	4	3	2	6	7
2	1	1	1	2	4	4	4	1	2	3	3	2	7
2	1	1	2	1	1	4	4	2	2	2	2	7	7
2	1	1	2	1	4	2	2	5	5	2	4	7	7
1	1	2	2	1	4	2	2	3	2	3	6	2	6
2	1	2	1	2	4	2	3	6	6	3	6	7	6
2	1	1	2	1	1	4	4	4	3	2	4	4	7
2	2	2	2	2	4	2	1	7	7	1	2	7	7
1	1	1	1	2	4	2	2	6	2	2	4	6	6
2	1	1	2	1	4	2	2	2	2	2	2	3	7
2	2	2	2	2	4	4	4	7	7	4	3	7	3
2	2	2	2	2	4	2	2	7	4	1	1	4	7
2	1	1	2	1	1	4	4	4	3	3	2	7	7
2	2	1	2	1	4	3	1	7	4	1	2	7	6
2	2	2	2	1	4	3	2	6	6	2	2	6	7
1	1	1	2	1	4	2	2	6	3	2	2	6	7
1	2	2	2	2	1	1	1	4	1	1	1	5	7
2	1	1	2	1	1	2	2	6	4	2	4	6	6
1	2	1	2	2	4	2	2	6	4	1	2	7	7
2	1	1	1	1	2	4	3	3	2	3	2	6	7
2	2	2	2	2	4	1	2	4	4	2	6	6	6
1	2	2	2	2	4	2	2	6	4	1	6	6	6
2	2	1	2	2	4	2	1	7	3	2	2	6	7
2	2	1	2	2	3	1	1	4	4	1	1	4	7
2	1	1	2	1	4	4	4	4	5	4	4	4	4
2	2	2	2		4	4	3	7	6	4	3	6	5
2	1	1	2	1	3	2	3	4	3	3	4	4	6
1	2	2	2	2	4	1	1	6	2	1	2	2	7
2	2	2	2	2	4	1	1	7	4	1	4	7	7
2	1	1	2	1	1	2	4	7	1	4	1	7	7
2	1	2	2	2	4	3	3	6	3	4	3	6	7
2	1	1	1	1	1	2	2	2	2	2	1	2	7
2	1	1	2	2	4	4	4	5	4	2	4	7	7
2	2	1	2	1	4	2	2	5	5	2	6	7	7
2	1	2	2	1	4	2	2	3	4	2	3	4	6
2	1	1	1	2	4	2	2	6	4	1	4	3	7
2	2	2	2	2	4	6	6	6	6	1	1	1	7
1	1	1	2	1	1	1	1	7	4	1	3	5	7
1	2	2	2	2	1	1	6	7	7	1	6	7	7
2	2	1	2	1	4	3	2	7	7	2	3	6	7
1	1	1	2	1	4	4	2	7	1	2	2	3	7
2	1	2	2	1	4	4	4	4	4	4	4	4	4
1	1	1	1	1	4	4	4	4	4	4	4	4	4
1	1	1	1	1	4	3	3	2	2	2	2	2	4
2	2	2	2	2	4	3	2	7	4	2	6	3	7
1	1	1	1	1	4	1	1	6	2	1	4	5	7
2	1	1	2	1	1	3	3	4	3	3	4	4	6
1	1	1	1	1	4	2	2	6	3	4	4	4	7
2	1	1	1	1	4	1	4	7	4	1	3	4	7
						2.65766	2.56757	4.86486	3.40541	2.18919	3.23423	4.75676	6.51351
						1.25559	1.24207	1.87197	1.64606	1.11107	1.56513	1.69905	0.909062
						Happy	Inviting	Clinical	Organised	Relaxed	Predictable	Scripted	Dangerous
						24	25	6	12	36	14	5	0
						33	35	9	26	40	29	6	0
						17	21	13	22	15	21	14	1
						33	26	21	30	18	28	28	8
						2	1	8	6	2	4	12	2
						2	3	25	7	0	13	25	22
						0	0	29	8	0	2	21	78
						The above as %s
						21.6216	22.5225	5.40541	10.8108	32.4324	12.6126	4.5045	0
						29.7297	31.5315	8.10811	23.4234	36.036	26.1261	5.40541	0
						15.3153	18.9189	11.7117	19.8198	13.5135	18.9189	12.6126	0.900901
						29.7297	23.4234	18.9189	27.027	16.2162	25.2252	25.2252	7.20721
						1.8018	0.900901	7.20721	5.40541	1.8018	3.6036	10.8108	1.8018
						1.8018	2.7027	22.5225	6.30631	0	11.7117	22.5225	19.8198
						0	0	26.1261	7.20721	0	1.8018	18.9189	70.2703

## Sheet: Scottish Triggers
How familiar are you with the Scottish countryside?	You are looking for triggers that you think your viewers would enjoy. Which of the following would make the best triggers? Please select your top four.				Please rate the appearance of the environment in the video about the Scottish countryside - Clean	Please rate the appearance of the environment in the video about the Scottish countryside - Intricate	Please rate the appearance of the environment in the video about the Scottish countryside - Welcoming	Please rate the appearance of the environment in the video about the Scottish countryside - Untidy	Please rate the appearance of the environment in the video about the Scottish countryside - Bright colours	Please rate the appearance of the environment in the video about the Scottish countryside - Warm-looking	Please rate the appearance of the environment in the video about the Scottish countryside - Modern
Scottish Triggers
Q85	Q88				Q78_1	Q78_2	Q78_3	Q78_4	Q78_5	Q78_6	Q78_7
3	2	6	8	9	5	3	2	5	3	3	6
3	4	5	6	9	5	2	2	3	5	5	7
3	1	6	8	9	1	3	1	7	2	1	4
5	2	6	8	9	2	2	2	4	2	2	6
4	2	3	4	9	5	3	4	2	4	5	5
5	3	5	6	9	1	1	1	4	4	4	6
4	1	4	5	6	4	4	4	4	4	4	4
5	1	5	6	9	2	5	2	5	2	2	4
4	1	2	5	8	4	3	2	5	2	1	4
3	5	6	8	9	4	4	4	4	4	4	4
4	1	4	5	6	2	1	1	7	2	4	7
5	2	3	6	8	4	4	4	4	4	4	4
3	3	4	5	9	3	5	2	6	2	2	4
5	2	3	5	9	1	1	1	7	2	2	2
4	3	4	5	8	6	6	2	3	6	2	6
5	2	4	5	6	1	1	1	7	2	2	4
3	3	4	5	9	3	4	3	6	3	5	4
3	4	5	6	9	6	4	2	4	6	3	6
5	2	4	5	9	4	6	2	3	5	5	6
3	2	5	6	7	1	3	2	7	3	3	6
4	5	6	8	9	3	3	3	5	4	4	7
5	1	3	6	8	4	4	3	4	3	2	5
5	2	4	5	7	6	2	1	3	3	1	3
1	2	4	5	9	3	3	4	4	4	4	4
4	2	4	5	6	2	3	2	6	3	3	6
3	2	3	4	5	2	2	2	3	5	3	4
4	3	6	8	9	2	6	2	3	3	2	4
5	2	5	7	9	4	6	1	5	3	1	6
5	2	4	6	9	4	2	2	4	2	2	4
3	2	4	5	9	4	2	2	4	2	2	5
5	2	4	5	6	3	2	2	3	5	2	5
5	2	4	5	6	1	4	2	3	5	2	6
5	3	4	5	6	4	4	4	4	4	4	4
5	2	4	5	6	3	3	3	4	4	4	4
5	2	3	6	7	1	1	1	7	1	1	2
5	3	4	5	6	2	1	2	7	2	2	1
5	2	4	5	6	1	2	2	6	3	3	4
5	2	3	4	5	4	4	4	4	4	4	4
5	2	3	4	5	6	2	2	2	4	3	5
1	2	3	4	5	2	4	2	5	2	3	6
5	4	5	6	7	5	5	3	4	6	2	4
4	1	2	5	8	1	2	1	7	3	3	6
3	2	3	4	5	3	3	1	5	4	2	6
4	3	4	5	9	2	5	2	6	5	5	4
3	2	5	6	9	3	3	1	3	6	1	6
3	3	7	8	9	4	4	4	4	4	4	7
5	2	4	5	9	3	4	2	5	5	3	4
1	2	3	6	9	1	4	1	7	7	1	4
4	1	2	3	6	2	2	2	5	3	3	4
5	2	4	5	6	3	5	3	3	4	3	6
5	3	4	5	8	1	4	1	7	2	2	6
5	2	4	5	8	3	7	1	5	6	2	7
3	2	3	6	9	4	4	4	4	4	4	4
4	1	3	6	9	4	6	1	4	3	1	7
4	5	6	7	9	4	4	3	6	6	4	4
5	2	3	8	9	2	2	1	7	3	3	4
1	5	6	8	9	4	4	4	4	4	4	4
4	2	4	5	9	4	2	2	4	5	4	7
4	2	4	5	6	3	6	1	7	2	2	2
														Most chosen Scottish Triggers:					How familiar are you with…
				Option										Option	Selection	%		Extremely	4	12.1212
				1	11	6	17	0	1	8	1			Wide shots of the countryside	9	15.2542			0	0
				2	11	13	25	2	14	18	3			Close ups and sounds of local plants	36	61.0169			14	42.4242
				3	12	11	7	10	13	13	1			Close ups and sounds of local wildlife	25	42.3729			15	45.4545
				4	17	17	10	19	16	15	26			Close ups and sounds of natural stone textures	34	57.6271		Not at all	26	78.7879
				5	4	5	0	10	8	5	5			Close ups and sounds of natural wood textures	44	74.5763
				6	4	6	0	6	6	0	16			Wide shots of running water	35	59.322
				7	0	1	0	12	1	0	7			Wide shots of locals walking through fields	7	11.8644
				Total	59	59	59	59	59	59	59			Swirling clouds	16	27.1186
														The sound of the wind	30	50.8475
				The above as %s
					Clean	Intricate	Welcoming	Untidy	Bright colours	Warm-looking	Modern			59
				1	18.6441	10.1695	28.8136	0	1.69492	13.5593	1.69492
				2	18.6441	22.0339	42.3729	3.38983	23.7288	30.5085	5.08475
				3	20.339	18.6441	11.8644	16.9492	22.0339	22.0339	1.69492
				4	28.8136	28.8136	16.9492	32.2034	27.1186	25.4237	44.0678
				5	6.77966	8.47458	0	16.9492	13.5593	8.47458	8.47458
				6	6.77966	10.1695	0	10.1695	10.1695	0	27.1186
				7	0	1.69492	0	20.339	1.69492	0	11.8644

## Sheet: SoundVideo Congruency
Sound/Video Congruency
Q93_1	Q93_2	Q93_3	Q93_4	Q93_5	Q94_1	Q94_2	Q94_3	Q94_4	Q94_5	Q91	Q92_1	Q92_2	Q92_3	Q94	Q96_1	Q96_2	Q96_3
I only get tingles from sounds made by objects shown on the screen	Background music adds to how effective ASMR videos are at inducing tingles	Background music inhibits me from feeling strong tingles	The content on the screen does not have to exactly match the sounds I hear for me to get tingles	I enjoy ASMR videos most when sounds help me to understand the material properties of objects on the screen	The pitch of the sounds affects how strongly I feel tingles	Higher pitched noises give me more intense tingles	Lower pitched noises give me more intense tingles	As long as the tone of a trigger sound matches what I expect to hear, I can get tingles from it	Background noise or music is a useful addition to ASMR audios	Please select one of the following: (unexpected sounds)	I can imagine the first half of the video (ceramic sounds) being effective at triggering my ASMR	I can achieve ASMR from the sound of a ceramic object being tapped	I can achieve ASMR from the sound of a wooden object being tapped	Please select one of the following (stacking)	I can imagine the first half of the video (before the final block) being effective at triggering my ASMR	I can achieve ASMR from objects being stacked neatly	I can achieve ASMR from the sound of metallic objects touching
2	1	7	3	5	6	3	4	5	1	2	5	5	5	2	6	5	5
6	2	6	2	6	6	2	6	6	1	3	5	5	5	3	5	5	3
3	4	4	6	4	6	3	6	5	4	2	4	3	6	2	5	4	5
1	1	7	6	2	6	1	5	4	3	4	2	2	2	4	2	2	2
5	3	4	4	3	3	4	4	3	4	1	5	5	6	3	6	6	5
7	5	3	1	6	4	4	5	6	7	3	3	2	2	2	2	1	6
7	1	7	1	7	5	6	4	5	2	3	7	5	6	4	4	4	4
1	5	7	7	7	5	7	7	7	1	3	6	6	5	3	7	7	7
4	1	7	2	7	4	4	4	5	1	3	4	4	4	3	4	4	4
6	1	5	1	6	5	2	2	7	3	3	1	1	1	3	1	1	1
2	5	3	5	5	7	3	5	5	5	4	5	5	5	2	5	5	1
2	1	7	4	4	4	4	4	6	2	2	5	5	5	3	2	1	1
1	2	6	3	5	5	4	5	4	3	3	3	2	3	3	3	2	2
3	5	4	5	4	5	2	5	5	6	1	5	4	6	4	5	6	5
5	6	2	3	7	4	4	4	5	5	2	2	2	5	2	3	5	2
4	3	3	2	6	3	2	4	5	2	4	4	6	6	4	6	6	6
1	1	7	6	7	7	5	5	7	2	4	6	6	6	4	7	1	7
2	4	4	2	4	6	4	6	5	5	2	1	1	3	2	1	1	1
5	1	6	2	5	5	4	4	5	3	2	2	2	2	2	3	3	4
3	3	3	5	4	5	4	5	5	4	3	5	5	5	3	6	6	5
2	4	5	3	5	5	2	4	3	1	3	5	5	6	4	3	3	3
2	3	5	7	5	5	3	5	4	4	1	6	6	5	4	3	2	5
5	3	4	7	6	7	5	4	3	4	1	6	6	6	4	3	5	4
5	4	3	5	6	5	3	4	5	5	4	1	7	5	2	7	6	5
2	1	7	3	3	6	4	5	5	3	2	2	2	2	2	6	5	5
6	2	6	3	6	6	4	4	5	2	1	7	7	7	4	7	3	7
1	1	6	6	4	5	2	6	2	2	4	6	6	7	4	7	2	7
1	3	3	6	4	1	2	1	4	3	1	7	7	7	4	6	5	6
7	5	2	2	4	7	3	5	6	5	1	7	7	7	4	6	5	6
6	1	6	6	6	7	4	5	6	3	1	2	2	6	1	6	6	3
1	1	7	2	5	6	2	6	5	2	1	3	3	6	1	3	3	5
2	1	6	6	3	7	4	4	5	1	3	2	2	5	4	5	5	4
1	2	4	3	6	4	4	4	4	1	1	6	6	6	4	6	6	6
2	3	5	5	6	5	2	6	5	4	4	4	4	4	2	5	4	4
1	4	4	5	5	7	4	4	6	4	2	2	2	6	4	6	6	6
1	2	7	2	7	7	1	7	5	2	3	6	6	7	2	7	7	5
5	2	6	2	6	5	5	3	4	3	4	4	4	4	4	5	5	4
5	2	6	1	4	7	5	2	5	2	3	2	2	7	3	6	6	6
3	2	6	1	3	6	2	6	5	2	3	2	2	2	4	1	1	1
1	1	7	6	2	6	5	4	2	1	1	6	6	6	4	5	1	6
3	1	5	3	5	3	2	2	2	2	1	7	7	7	4	6	4	7
1	3	5	7	6	7	7	6	2	2	1	6	6	6	1	6	6	6
2	4	5	5	3	5	5	3	4	3	4	6	6	6	4	6	2	6
5	2	5	2	6	6	4	4	6	3	3	1	1	1	3	1	1	1
3	3	5	5	5	6	3	5	4	2	3	7	6	6	2	6	5	6
6	1	7	4	6	3	2	6	6	1	4	5	5	5	4	2	2	5
3	3	6	5	5	4	4	4	5	2	1	2	2	6	4	3	6	3
3	2	5	2	6	5	4	4	4	4	4	6	5	5	2	6	6	6
2	3	2	2	2	3	2	2	2	4	4	2	2	2	4	5	4	4
2	1	6	2	6	4	4	4	6	5	3	5	5	5	4	5	5	3
2	2	4	2	7	6	4	4	5	4	1	6	6	6	4	5	4	5
3	1	7	1	5	6	3	5	6	1	3	2	2	5	2	5	5	5
2	2	6	2	5	5	3	6	5	6	3	5	6	6	2	1	5	3
1	4	4	7	4	7	2	2	4	4	4	7	7	7	3	5	6	4
2	2	5	4	6	2	1	4	5	2	3	3	2	2	3	5	5	5
1	1	6	1	1	7	4	4	1	2	4	1	1	1	4	1	1	1
7	4	7	1	7	7	1	7	7	1	1	4	4	7	4	5	4	4
6	6	6	2	5	5	2	5	4	2	4	1	1	1	4	1	1	1
4	1	7	6	4	5	2	6	2	1	1	6	6	6	4	6	6	5
2	5	3	7	4	4	4	4	5	5	4	2	3	3	2	3	4	3
6	5	3	1	7	6	1	6	4	5	1	5	5	5	3	7	5	6
6	3	6	5	4	5	4	5	5	3	1	5	5	7	4	5	2	5
2	3	6	7	2	7	1	7	6	3	1	6	6	7	2	5	6	3
1	1	7	5	4	7	1	7	7	1	2	5	7	5	4	4	4	4
2	3	5	5	5	5	6	2	5	5	3	6	5	2	3	5	5	2
2	3	5	7	7	4	4	4	5	3	4	3	3	3	4	3	3	3
2	2	5	4	3	6	2	5	2	2	4	4	3	2	4	2	1	2
6	2	6	2	6	5	4	4	6	2	2	6	5	6	1	6	6	6
2	1	7	5	5	7	3	6	2	1	3	6	6	5	4	5	2	5
7	7	3	3	5	6	2	6	4	4	3	5	5	5	4	7	4	5
2	3	5	6	5	3	4	4	3	3	4	6	6	6	4	6	5	7
3	2	5	3	6	6	3	5	2	2	1	5	5	6	2	3	3	3
4	1	1	6	2	2	1	6	1	1	1	2	5	3	1	2	1	1
1	1	7	6	4	6	1	1	5	4	4	7	6	6	4	6	6	6
3	5	3	5	4	4	4	4	4	5	4	5	5	5	4	5	3	5
5	3	5	3	6	5	5	3	6	2	3	6	6	5	2	5	6	3
1	1	4	6	2	2	1	5	3	2	4	1	1	1	4	1	1	1
1	1	7	6	1	6	3	6	6	4	1	1	1	7	4	6	6	6
2	2	4	4	4	7	4	4	5	2	4	2	2	2	2	6	5	4
2	1	6	6	5	4	4	4	4	5	4	5	3	3	4	5	3	5
1	2	7	5	2	5	3	5	4	4	3	3	2	6	2	4	5	2
6	2	6	4	6	4	3	5	4	2	4	3	2	4	4	2	2	2
5	4	4	3	5	6	3	6	5	5	1	6	6	6	4	6	5	6
1	3	5	4	4	5	4	4	4	3	3	4	4	4	4	4	4	4
5	4	4	4	5	6	3	5	4	4	4	5	6	6	2	6	5	5
6	7	1	2	6	6	2	6	6	6	3	5	5	5	2	5	3	3
5	2	6	5	6	6	3	5	5	3	3	6	6	6	2	6	6	5
2	1	7	1	4	7	1	5	6	1	1	7	7	7	4	7	7	7
7	3	6	2	6	7	3	6	5	4	3	5	5	5	2	6	6	6
2	1	7	6	6	5	2	5	5	2	1	3	4	4	4	1	1	3
2	2	5	6	6	6	2	6	5	2	1	5	5	6	2	3	2	5
5	2	6	5	4	7	3	5	5	4	3	3	4	5	4	4	5	4
2	3	5	2	2	6	2	5	6	4	3	2	2	5	2	3	4	2
1	1	6	6	5	6	7	3	5	3	3	2	2	5	4	5	4	3
1	1	7	1	6	4	4	5	4	1	4	1	1	1	4	1	1	4
2	3	5	6	5	7	4	4	6	3	1	6	6	4	2	4	6	5
2	7	1	1	6	6	2	6	4	1	3	7	6	6	4	2	1	4
5	1	7	3	6	4	5	4	4	2	3	7	7	7	2	5	4	4
2	1	7	7	2	6	5	3	2	1	1	7	7	7	2	7	6	6
2	3	5	7	3	7	3	6	2	2	1	3	2	6	4	2	2	2
5	1	7	5	4	5	4	4	4	2	2	2	2	2	4	2	2	1
2	4	4	6	4	6	4	5	4	6	4	6	6	6	4	4	4	5
7	1	7	1	4	7	1	7	4	1	4	1	1	1	4	6	4	6
3	2	5	2	5	5	3	5	4	2	3	3	3	2	4	4	3	3
1	2	6	6	6	6	2	6	6	2	3	2	2	7	3	1	1	1
1	1	7	7	1	1	1	1	1	1	4	1	4	4	4	4	1	1
1	1	3	5	6	4	2	4	5	3	2	3	3	6	4	5	4	2
2	4	4	5	4	5	4	4	6	5	4	3	2	5	2	5	5	4
2	5	5	1	6	7	1	7	2	3	1	1	1	7	3	6	6	5
6	2	2	3	6	7	1	7	3	1	4	2	2	6	4	2	4	2
7	1	7	1	4	7	5	6	5	1	4	1	1	1	4	5	5	5
1	7	5	2	6	7	3	4	4	2	2	2	5	7	4	4	4	3
2	1	7	5	1	7	1	7	2	1	3	7	7	7	4	3	5	1
3	5	3	6	4	4	3	5	4	5	3	5	5	6	3	5	5	5
5	2	5	3	3	5	2	6	3	3	1	2	2	5	4	5	4	5
1	4	2	3	7	1	1	6	5	3	4	6	6	6	4	6	4	6
2	6	2	6	4	6	2	6	4	6	3	6	6	6	4	2	2	2
2	1	7	4	5	5	2	6	2	1	4	5	5	6	1	5	4	6
4	1	6	2	4	4	4	4	4	1	4	4	4	4	4	4	4	4
2	2	6	5	3	5	4	4	2	2	1	4	2	6	4	3	2	3
5	1	7	4	5	6	4	4	4	4	2	3	2	5	4	6	4	6
7	1	7	5	2	6	2	6	6	1	4	6	6	6	4	2	2	5
2	1	7	1	7	6	2	6	5	1	2	3	3	5	2	5	6	4
2	2	5	4	2	5	4	4	5	2	4	1	1	1	4	1	1	1
1	1	7	7	1	6	5	6	1	1	3	1	5	5	4	1	6	6
7	1	1	5	5	6	2	6	6	1	3	6	6	6	1	6	7	2
3.14286	2.50794	5.19048	3.96825	4.6746	5.34127	3.11111	4.75397	4.4127	2.78571	2.65873	4.10317	4.14286	4.88889	3.19048	4.34921	3.95238	4.0873
										Bowl				Stacking
28	46	4	16	5	3	17	3	4	30	33	15	12	9	7	13	19	15
41	28	6	23	11	3	31	6	15	34	15	22	28	12	32	13	15	13
13	22	12	16	9	6	23	5	7	22	40	15	9	6	17	15	10	17
5	13	15	12	28	17	39	41	31	20	38	10	10	9	70	12	25	20
17	10	27	24	27	32	11	30	42	14		24	26	30		32	27	30
12	3	27	23	34	37	2	32	22	5		27	30	41		31	26	24
10	4	35	12	12	28	3	9	5	1		13	11	19		10	4	7

## Sheet: DistanceAndDetails
Distance/Details		Distance from trigger/Strength of tingles
Q99	Q101	Q103_1	Q103_2	Q103_3	Q103_4	Q103_5	Q103_6	Q103_7	Q104_1	Q104_2	Q104_3	Q104_4	Q104_5	Q105_1	Q105_2	Q85_1	Q85_2	Q86_1	Q86_2
Which action would you most like to watch?	Would your distance from the host while they perform affect how strongly you experience tingles?	10cm (4in)	30cm (12in)	60cm (2ft)	1 metre (3ft)	2 metres (6ft)	3 metres (9ft)	4 metres or more (12ft+)	How important would the following factors be in triggering your ASMR? - Focus on the small physical details	How important would the following factors be in triggering your ASMR? - Focus on any symmetry in the object	How important would the following factors be in triggering your ASMR? - The colour of the object	How important would the following factors be in triggering your ASMR? - Focus on the material that the objects is made from	How important would the following factors be in triggering your ASMR? - Sounds that the object would make if manipulated by a host	Knowing this extra information would increase the effectiveness of the object as an ASMR trigger	Knowing this extra information would have no effect on its effectiveness as an ASMR trigger	Demonstrates expert use of object - increases tingles	Demonstrates expert use of object - no effect.	Trial and Error use - increases tingles	Trial and Error use - no effect
1	2	5	6	7	8	6	4	2	3	2	2	2	1	2	4	4	2	2	4
1	1	9	8	7	6	5	4	3	3	3	3	3	3	3	3	3	3	3	3
1	2	5	9	5	5	5	5	1	2	2	3	2	2	4	2	4	2	2	4
1	2	3	4	4	5	5	5	5	3	3	5	3	2	3	3	4	2	4	2
1	1	3	5	7	8	6	4	2	2	4	2	1	1	5	2	4	2	5	2
1	1	7	7	7	7	7	7	7	2	4	3	3	3	3	3	4	2	2	4
1	1	6	5	5	4	3	3	3	2	3	5	2	2	3	4	2	4	4	2
1	1	9	9	8	8	6	1	1	2	2	2	2	4	5	1	5	1	4	3
1	1	5	5	6	7	6	5	3	1	5	5	2	1	4	3	5	1	2	2
1	2	5	5	5	5	5	4	3	3	3	3	2	2	2	4	3	3	3	3
1	2	5	5	5	5	5	5	5	3	1	3	2	1	3	5	5	1	3	3
1	1	5	6	8	8	6	3	1	4	5	4	2	1	4	2	4	2	5	2
1	2	8	7	6	5	5	2	1	4	3	5	4	2	1	5	4	4	2	4
1	2	5	5	6	6	6	5	2	4	5	5	2	1	4	2	5	1	4	2
1	1	1	1	4	5	4	3	2	1	1	1	3	4	4	2	5	1	1	3
1	2	5	5	5	5	2	1	1	3	5	5	1	1	3	3	3	3	3	3
1	1	1	1	1	3	4	5	7	2	3	4	3	3	3	3	3	3	3	3
1	2	9	8	8	8	8	8	5	3	4	5	3	2	1	5	4	1	3	3
1	1	3	4	5	7	8	6	5	3	4	4	3	2	4	2	4	2	1	1
1	1	1	3	5	7	6	2	1	1	3	3	2	2	5	1	5	1	3	3
1	2	8	9	8	7	6	5	4	3	3	3	3	2	4	4	3	3	3	3
1	1	5	7	7	6	6	6	5	3	5	5	3	2	2	4	4	2	3	3
1	2	4	8	8	7	3	3	2	5	5	5	2	2	5	1	5	1	5	1
1	2	4	4	5	6	6	6	5	4	3	4	2	1	4	2	4	2	3	3
1	2	3	5	7	5	4	4	3	3	3	4	3	2	3	2	5	1	4	2
1	1	6	7	8	8	7	5	4	3	4	2	3	2	4	3	4	3	4	3
1	1	7	7	6	5	3	2	1	5	5	5	4	3	5	3	4	4	3	3
1	2	5	5	5	8	3	1	1	4	4	4	4	1	1	5	5	2	1	5
1	1	6	5	2	1	1	1	1	5	5	4	4	1	3	4	4	3	1	5
1	1	5	9	5	5	5	1	1	2	5	5	4	3	3	5	3	3	2	3
1	2	5	8	9	8	1	1	1	1	5	5	1	1	1	5	1	5	1	5
1	1	7	7	7	7	5	4	2	1	1	1	1	1	5	1	5	1	4	3
1	2	9	8	7	6	5	4	3	5	4	4	3	2	4	2	4	2	1	5
1	1	8	9	9	8	5	3	1	3	3	4	3	2	3	5	4	2	2	2
1	1	5	5	7	7	5	5	5	3	3	5	2	1	2	5	1	5	5	1
1	3	5	5	5	5	5	5	5	5	5	5	5	2	1	5	1	5	1	5
1	3	5	7	9	5	3	2	1	4	3	5	3	1	1	5	5	1	5	3
2	1	7	6	5	5	5	5	5	5	5	5	5	2	1	5	3	4	3	4
2	3	9	8	8	7	7	6	5	2	2	2	2	2	5	2	5	1	4	2
2	2	4	4	5	7	7	5	4	2	5	5	3	1	3	4	4	3	2	3
2	3	1	2	3	4	5	7	9	5	5	5	4	1	3	4	5	1	2	2
2	1	9	8	7	6	5	5	5	5	5	5	2	1	1	5	1	5	1	5
2	2	5	7	7	5	5	3	2	4	2	4	4	3	4	2	4	4	2	2
2	1	1	4	6	6	5	1	1	2	4	4	2	2	4	2	4	1	5	1
3	1	8	8	7	5	3	2	1	3	3	3	2	2	2	4	4	2	2	2
3	1	7	5	4	4	3	3	2	1	1	5	2	1	5	1	4	2	2	3
3	1	1	2	5	6	5	5	1	5	5	5	5	4	3	5	4	3	2	3
3	2	5	5	5	5	4	4	2	2	2	3	1	1	4	2	3	3	4	2
3	2	5	5	5	5	5	5	5	1	1	5	4	1	3	3	4	3	3	3
3	1	9	9	7	6	3	1	1	3	4	3	3	1	5	1	5	1	1	5
3	3	4	5	6	3	2	1	1	4	1	5	4	2	1	5	4	2	3	3
3	1	5	6	5	4	2	1	1	4	4	5	4	2	1	5	2	4	3	3
3	1	7	9	8	5	2	1	1	1	5	5	4	2	2	4	4	2	2	2
3	1	9	8	7	7	4	2	1	5	5	5	5	4	2	3	3	3	3	3
3	1	9	8	7	6	5	3	1	4	5	5	2	1	1	5	4	3	4	1
3	2	7	7	7	7	4	4	2	3	2	5	2	2	1	5	5	1	4	3
3	1	2	5	5	8	5	4	2	3	2	3	3	4	3	5	4	2	3	3
3	2	8	8	7	5	4	4	1	3	2	4	2	2	4	2	5	2	5	1
3	1	6	6	6	5	3	2	2	5	5	5	5	1	3	4	3	3	4	2
3	1	1	5	9	8	4	1	1	2	2	4	3	1	5	1	5	1	5	1
3	2	7	7	6	5	3	2	2	2	2	2	1	1	3	5	5	3	2	3
3	2	9	8	5	3	2	1	1	5	5	5	5	1	3	3	3	3	3	3
3	2	8	7	6	5	1	1	1	5	5	5	3	1	2	4	5	1	3	3
3	1	9	5	5	5	1	1	1	1	3	3	1	1	5	1	5	2	1	4
3	2	7	7	7	7	7	5	2	5	5	5	5	2	1	5	1	5	4	2
3	1	8	5	4	3	1	1	1	1	5	4	1	1	1	5	5	1	1	5
3	3	9	8	7	6	5	5	5	5	4	5	2	2	4	4	4	4	2	2
3	1	5	6	7	5	3	2	1	4	5	4	3	1	3	4	3	3	3	3
3	1	7	7	5	5	1	1	1	2	2	5	1	2	1	5	2	2	4	2
3	1	7	7	7	7	5	3	3	1	3	3	2	1	3	3	5	1	4	3
3	1	1	5	3	3	2	2	1	5	5	5	4	4	4	2	4	2	1	2
3	1	5	5	5	4	4	1	1	2	2	2	2	1	4	2	4	2	4	2
3	1	6	6	5	5	3	2	1	2	2	2	2	1	2	4	5	2	2	2
3	1	6	6	7	9	5	1	1	4	4	4	3	2	3	5	4	2	2	2
3	2	8	7	6	6	2	1	1	5	4	4	4	1	1	2	4	2	2	4
3	2	7	7	7	5	5	3	3	2	3	5	2	1	4	2	5	1	4	2
3	1	5	5	7	9	9	6	2	2	3	4	1	1	1	5	5	1	4	2
3	1	8	8	5	4	1	1	1	2	3	5	3	2	4	3	4	3	4	3
3	3	8	7	6	6	4	2	1	3	3	4	2	1	3	3	3	3	3	3
3	2	6	6	6	5	4	3	2	3	5	5	4	2	3	3	3	3	4	3
3	3	5	6	7	7	6	4	1	3	4	4	1	1	3	3	4	4	4	2
3	2	5	5	6	6	6	4	3	5	5	5	3	1	3	4	5	2	3	3
3	2	1	1	1	5	5	1	1	3	5	5	2	2	1	5	5	2	5	1
3	1	8	8	7	3	1	1	1	2	4	4	3	1	2	4	4	2	4	2
3	2	6	6	7	6	4	3	2	3	3	4	4	5	4	2	5	1	2	4
3	2	7	7	7	6	5	4	4	3	4	5	2	1	1	5	5	1	2	1
3	2	5	6	5	5	5	4	4	2	5	5	5	2	1	5	5	1	1	1
3	2	2	2	5	2	2	2	2	3	3	4	4	3	5	1	5	1	5	1
3	1	6	6	7	7	7	8	7	3	5	5	4	2	2	5	4	2	4	4
3	2	5	5	5	5	5	5	5	5	5	4	3	2	2	3	4	2	3	3
3	1	9	9	8	8	6	5	3	4	4	5	2	1	4	2	4	2	3	3
3	1	8	7	6	5	4	3	1	5	5	5	5	2	1	5	1	5	1	5
3	1	4	5	7	6	4	3	2	3	4	5	3	2	3	4	5	3	3	4
3	1	8	9	8	6	5	5	4	2	2	5	4	1	3	3	4	2	1	4
3	1	8	7	6	5	4	3	1	5	5	5	5	5	4	3	1	5	1	5
3	1	9	8	8	5	4	3	1	2	3	3	1	1	2	4	4	2	3	3
3	2	8	7	7	5	1	1	1	3	5	5	5	3	1	5	1	5	3	3
3	1	8	7	5	3	1	1	1	4	3	4	3	1	5	1	5	1	1	4
3	1	9	8	7	6	5	2	1	3	5	5	2	1	4	4	4	2	2	2
3	2	1	5	9	5	1	1	1	5	5	5	3	3	1	5	4	2	1	5
3	3	5	5	5	5	5	5	5	5	5	5	5	1	3	5	1	3	3	3
3	1	9	9	9	5	5	1	1	3	3	4	3	2	4	3	4	2	3	3
3	1	9	5	5	5	4	2	1	1	1	5	1	1	1	5	3	3	1	4
3	3	1	1	1	5	5	4	3	2	2	5	2	1	1	5	5	1	3	3
3	1	7	7	5	5	5	3	3	4	5	5	2	1	3	2	5	1	5	1
3	1	1	1	1	5	7	9	8	4	5	5	4	1	1	5	2	5	1	2
3	1	6	6	6	6	5	4	1	5	5	4	3	1	4	2	4	2	1	1
3	2	5	5	5	5	5	5	5	3	3	3	3	3	3	3	3	3	3	3
3	3	6	6	8	8	6	5	5	5	5	5	3	1	2	4	4	2	2	4
3	1	1	1	5	6	4	1	1	5	5	5	4	1	1	5	1	5	1	5
3	2	9	8	7	6	5	4	3	5	5	5	5	1	1	5	4	2	4	2
3	2	5	5	5	5	5	5	5	5	5	4	3	2	2	3	4	2	3	3
3	1	9	9	8	7	6	4	1	1	3	5	3	2	5	1	5	1	4	2
3	1	1	5	3	3	2	2	1	5	5	5	4	4	4	2	4	2	1	2
3	2	7	6	6	3	1	1	1	2	3	5	2	2	1	5	5	1	2	2
3	3	5	6	7	7	3	1	1	2	5	5	1	1	4	2	3	4	5	2
3	1	9	8	8	5	4	3	1	2	3	3	1	1	2	4	4	2	3	3
3	1	9	8	7	6	5	2	1	3	5	5	2	1	4	4	4	2	2	2
3	1	2	3	7	7	5	4	2	2	3	2	1	1	4	2	4	2	3	3
3	2	1	5	9	5	1	1	1	5	5	5	3	3	1	5	4	2	1	5
3	1	9	9	8	8	6	5	3	4	4	5	2	1	4	2	4	2	3	3
3	1	2	6	5	2	1	1	1	2	1	4	2	1	5	1	5	1	2	2
3	1	9	7	5	4	3	2	1	2	3	2	1	1	4	2	5	1	3	3
3	2	5	5	5	5	5	5	5	1	1	5	4	1	3	3	4	3	3	3
3	1	5	5	5	4	4	1	1	2	2	2	2	1	4	2	4	2	4	2
3	2	8	8	7	5	4	4	1	3	2	4	2	2	4	2	5	2	5	1
3	1	6	6	6	5	3	2	2	5	5	5	5	1	3	4	3	3	4	2
3	2	9	8	7	6	5	4	3	5	5	5	5	1	1	5	4	2	4	2
3	1	7	7	7	5	3	2	2	3	3	3	3	2	4	2	5	2	2	4
3	1	8	5	4	3	1	1	1	1	5	4	1	1	1	5	5	1	1	5
3	1	9	9	7	6	3	1	1	3	4	3	3	1	5	1	5	1	1	5
3	2	7	7	7	6	5	4	4	3	4	5	2	1	1	5	5	1	2	1
3	1	7	7	5	5	5	3	3	4	5	5	2	1	3	2	5	1	5	1
3	3	9	8	7	6	5	5	5	5	4	5	2	2	4	4	4	4	2	2
3	1	8	7	6	5	4	3	1	5	5	5	5	2	1	5	1	5	1	5
	Unsplit by trigger
	Q103 onwards
	Option	Number of selections
	1	15	6	4	1	15	35	65	15	9	2	18	70	34	13	11	37	27	16
	2	4	3	1	2	9	20	22	31	18	11	42	45	16	31	4	50	29	39
	3	4	2	3	10	17	20	16	37	32	18	37	11	34	23	18	27	37	49
	4	5	5	5	8	22	23	7	18	22	31	22	7	35	25	57	10	28	15
	5	32	36	39	52	46	27	20	34	54	73	16	2	16	43	45	11	14	16
	6	12	19	19	27	16	5	0
	7	18	28	42	19	7	2	3
	8	19	23	15	14	2	2	1
	9	26	13	7	2	1	1	1
	Total	135	135	135	135	135	135	135	135	135	135	135	135	135	135	135	135	135	135
		The above as %s
		9.74026	3.8961	2.5974	0.649351	9.74026	22.7273	42.2078	9.74026	5.84416	1.2987	11.6883	45.4545	22.0779	8.44156	7.14286	24.026	17.5325	10.3896
		2.5974	1.94805	0.649351	1.2987	5.84416	12.987	14.2857	20.1299	11.6883	7.14286	27.2727	29.2208	10.3896	20.1299	2.5974	32.4675	18.8312	25.3247
		2.5974	1.2987	1.94805	6.49351	11.039	12.987	10.3896	24.026	20.7792	11.6883	24.026	7.14286	22.0779	14.9351	11.6883	17.5325	24.026	31.8182
		3.24675	3.24675	3.24675	5.19481	14.2857	14.9351	4.54545	11.6883	14.2857	20.1299	14.2857	4.54545	22.7273	16.2338	37.013	6.49351	18.1818	9.74026
		20.7792	23.3766	25.3247	33.7662	29.8701	17.5325	12.987	22.0779	35.0649	47.4026	10.3896	1.2987	10.3896	27.9221	29.2208	7.14286	9.09091	10.3896
		7.79221	12.3377	12.3377	17.5325	10.3896	3.24675	0
		11.6883	18.1818	27.2727	12.3377	4.54545	1.2987	1.94805						Mixed bag
		12.3377	14.9351	9.74026	9.09091	1.2987	1.2987	0.649351
		16.8831	8.44156	4.54545	1.2987	0.649351	0.649351	0.649351

## Sheet: Hardware
Hardware
Q87_1	Q87_2	Q87_3	Q88					Q89	Q90	Q91	Q92_1	Q92_2	Q92_3	Q92_4	Q92_5	Q92_6	Q92_7	Q93_1	Q93_2	Q93_3
Do you regularly consume ASMR media recorded binaurally?	If yes, do you feel that binaural audio is more effective than regular audio?	Do you think binaural audio makes the tingles more intense?	What hardware do you use to watch ASMR videos? Tick all that apply. - Selected Choice					Which of the below do you feel is most effective for viewing ASMR videos? Select one option. - Selected Choice	Do you use headphones when viewing ASMR videos?	Do you ever find yourself adjusting the settings of your screen for ASMR videos?	Please rate the following statements - The brightness of the screen can be distracting when viewing ASMR videos	Please rate the following statements - I like the brightness of the screen to be high when watching ASMR videos	Please rate the following statements - I like the brightness of the screen to be low when watching ASMR videos	Please rate the following statements - The brightness of the screen does not affect my enjoyment of ASMR videos	Please rate the following statements - I like the contrast of the screen to be high when watching ASMR videos	Please rate the following statements - I like the contrast of the screen to be low when watching ASMR videos	Please rate the following statements - The contrast of the screen does not affect my enjoyment of ASMR videos	I would be interested in trying an ASMR experience that makes use of haptic feedback	I feel that haptic feedback would impact negatively on an ASMR experience	Haptic feedback timed with sounds would increase ASMR tingles
1	1	1	3					3	3	1	5	1	5	1	2	3	2	3	2	3
2	2	2	2	3				2	4	2	2	1	2	1	4	1	1	2	3	1
1	2	2	1	2	3	4		3	5	1	2	3	3	2	3	3	3	2	3	1
1	3	3	2	3				3	5	2	2	1	5	3	1	4	3	3	1	3
1	3	2	2	3				4	2	1	2	1	2	4	2	2	4	1	2	2
1	2	1	2	3				7	4	1	3	2	4	2	3	2	4	1	3	1
2	2	2	2	3	4			7	3	2	1	3	3	4	3	3	4	2	2	2
1	1	1	2	3				2	5	2	1	1	1	5	1	1	5	1	2	2
1	1	1	1					1	5	2	1	5	1	5	3	3	5	3	1	3
1	2	2	2	3				7	2	2	2	2	4	3	1	1	5	2	3	2
1	1	1	2	3				7	4	2	2	2	2	2	1	1	5	3	1	3
1	1	1	1	2				7	5	2	2	3	2	4	4	2	3	3	2	2
2	2	2	2	3	4			7	3	1	5	1	5	4	2	4	3	1	2	2
1	1	1	3	4				4	3	2	3	1	4	2	2	2	2	2	2	2
3	1	1	3					3	2	1	4	1	5	4	1	4	2	2	3	1
1	2	1	3					3	4	2	2	2	4	2	1	3	2	2	2	2
1	2	3	1	3				3	5	1	4	1	4	2	2	2	3	2	2	2
1	1	1	1	2	3	4	5	2	3	2	2	2	1	4	2	1	4	2	2	2
2	2	2	2	3				3	5	2	2	1	2	2	2	2	2	3	1	3
1	1	1	2	3				2	2	2	2	3	3	4	4	3	3	2	2	2
1	3	2	3					3	2	1	3	1	4	1	2	2	2	1	2	2
1	1	1	1					1	5	1	5	1	4	1	4	2	3	1	3	1
1	1	1	2					6	5	2	2	1	2	2	1	1	4	2	3	2
1	1	1	1	2	3			7	5	2	5	1	5	3	1	1	5	1	3	1
1	1	1	3					3	2	2	2	1	4	2	1	2	2	1	3	1
1	1	1	2	3				2	3	1	3	2	4	3	2	2	4	2	2	2
1	3	3	2	3				2	5	2	1	1	2	5	1	1	5	3	2	2
1	1	1	1					1	5	2	1	1	1	5	1	1	5	2	2	2
1	1	1	2	3				2	4	2	2	2	4	5	1	4	4	1	2	2
1	2	2	2	3				2	3	2	1	1	2	4	2	2	5	1	3	2
1	1	1	2	3				3	5	1	2	4	2	3	3	3	4	1	2	2
1	1	1	1					1	5	2	2	2	4	3	2	2	2	1	2	2
1	2	2	2	3	4	5		4	4	1	5	1	5	2	3	3	5	3	1	2
1	3	3	2					2	1	1	4	1	4	2	1	1	5	1	3	2
1	1	1	3					3	4	1	5	1	5	1	1	5	1	2	2	2
3	2	2	2	3	4			7	2	2	1	1	1	5	1	1	5	1	3	1
1	1	1	1	3				1	5	1	2	1	4	2	2	2	4	1	3	1
1	1	1	1	3				7	4	2	1	1	1	5	1	1	5	3	1	3
1	1	1	3					7	4	2	2	4	1	2	4	1	2	1	2	2
1	1	1	3	4				4	3	2	2	1	5	2	1	1	5	3	1	3
1	1	1	2	3	5			7	3	2	2	2	2	3	4	2	3	2	2	2
1	1	1	2	3				3	2	2	2	2	2	5	1	1	5	1	2	1
1	1	1	2	3	5			3	2	2	2	2	2	4	1	1	5	3	1	2
3	1	1	2					2	2	1	2	2	2	2	2	2	2	2	3	2
1	1	1	1	3	6			7	4	2	1	1	1	5	1	1	5	3	1	2
1	3	3	1	2	3	4		3	5	1	4	1	5	2	1	5	2	1	2	2
1	2	2	3	5	6			5	2	2	2	3	3	3	3	3	3	1	2	2
1	1	1	1	3				1	5	2	2	1	2	4	1	2	4	3	1	3
1	2	3	3					3	3	1	5	1	5	2	2	4	2	3	1	3
1	3	2	1	3	5			6	4	2	2	1	1	4	1	1	5	1	3	2
1	2	2	1	3				7	1	1	5	1	5	1	1	5	1	3	1	3
1	1	1	2	3	5			2	2	2	3	1	3	3	3	3	3	1	3	1
3	3	3	3					3	2	1	2	2	2	3	1	1	5	3	1	3
1	1	1	1	2	3			1	5	2	1	1	1	5	1	1	5	2	2	2
1	2	2	2	3				2	5	2	2	2	4	3	2	2	2	1	2	2
1	2	2	4					4	5	2	1	1	3	5	3	3	5	2	2	2
1	1	1	2	3	4			3	3	1	3	2	4	2	2	2	2	1	2	2
1	3	3	1					1	5	1	5	1	5	1	2	4	1	1	3	2
1	3	3	3					3	3	2	5	1	5	1	1	5	1	3	1	3
1	1	1	2					2	5	1	2	2	2	2	2	2	2	1	3	2
3	3	1	3					3	3	1	2	1	4	3	4	3	3	2	2	2
3	2	2	4					4	1	2	2	1	4	4	1	1	5	3	1	3
1	1	1	2	3	6			1	5	1	2	2	4	2	2	4	2	1	2	2
1	1	1	2	3	4			2	5	1	2	3	3	2	1	1	1	1	3	2
1	2	2	1	3				3	5	1	2	1	2	4	3	3	3	1	3	2
1	1	1	2	3	4			4	5	2	2	2	2	4	2	2	4	1	3	1
3	2	2	1	5				5	2	2	2	1	4	2	1	4	2	1	2	3
1	1	1	1	3	4			7	3	2	2	2	4	2	2	4	3	1	2	2
1	1	1	3	4				3	5	1	3	2	2	1	1	1	3	1	3	2
1	1	3	1	3				7	5	2	1	1	2	5	1	1	5	3	1	3
1	2	2	3					7	1	2	2	1	5	2	3	3	3	3	2	2
1	1	1	1	2	3	4	5	1	2	2	2	1	4	3	1	1	5	1	3	1
1	1	1	2	3				3	5	2	2	1	5	2	3	3	5	3	3	3
1	3	3	3	4				4	2	1	4	1	4	2	2	4	4	1	2	2
1	1	1	3	4				4	4	1	4	2	4	1	3	3	4	2	2	2
1	1	1	3	4				7	5	1	4	1	5	2	2	2	2	3	2	2
1	1	1	3					3	3	2	1	1	1	5	1	1	5	1	2	2
1	1	1	5					5	4	2	1	3	3	5	3	3	5	1	3	1
1	1	1	3	4	5			3	5	2	2	1	5	4	2	2	5	3	1	2
1	1	1	3	4				4	2	2	2	1	4	2	3	3	2	2	2	2
1	3	2	1	2	3	4		3	4	2	2	1	4	3	3	3	3	1	2	2
1	1	1	2					2	5	2	1	1	1	5	1	1	5	1	3	1
2	2	1	2	3				2	4	2	1	1	1	5	1	1	5	3	1	3
1	1	1	1	4				4	5	1	3	2	3	2	2	2	2	3	1	3
1	1	1	1	2	3			2	5	1	2	1	4	1	1	1	1	1	3	1
1	1	1	2	3				2	4	2	1	1	1	5	1	1	5	2	1	2
1	1	1	2	3				3	3	2	3	1	4	4	1	5	5	2	1	3
1	3	3	1	2	3	4		4	1	2	1	1	1	5	1	1	5	1	3	2
1	1	1	3	4				3	5	2	2	2	2	4	2	2	4	1	3	1
2	2	2	3					3	2	2	2	1	5	2	1	5	2	3	1	3
1	2	1	1	2	3			7	4	2	4	1	5	5	1	1	5	3	1	3
3	3	3	2	4				2	4	2	1	1	1	5	1	1	5	2	1	2
1	1	1	3					3	5	2	2	2	2	2	2	2	2	2	2	2
1	3	2	2	4				2	2	2	4	1	5	1	3	3	3	1	2	2
1	1	1	2					2	4	2	1	1	1	5	1	1	5	3	1	2
1	2	3	1	3				1	1	2	1	1	1	5	1	1	5	3	1	3
1	1	1	1	2	3	4		4	3	1	2	1	4	2	1	1	4	3	1	3
1	1	1	3					7	4	1	4	1	5	1	1	5	1	1	3	1
1	2	2	1	2	3			6	5	1	3	2	4	1	4	1	1	3	2	3
2	3	3	2					2	2	2	1	3	3	1	3	3	3	2	2	2
1	1	1	2					2	5	2	1	1	1	5	1	1	5	2	1	2
1	1	1	2	4	5			4	5	2	2	2	3	4	3	1	2	1	2	2
3	2	2	2					2	4	2	2	2	3	3	3	3	3	1	2	2
1	1	1	4					4	4	2	1	1	1	4	1	1	5	2	3	2
1	1	1	4					4	5	2	2	2	2	2	3	3	2	1	2	2
1	1	2	4					4	5	2	1	1	1	5	1	1	5	3	1	3
1	1	1	1					7	5	2	1	1	1	5	1	1	5	2	2	2
1	2	2	1					1	1	1	2	2	4	2	3	4	3	3	2	1
					%s
92	63	66	Desktop	33	30.5556			12	7	37	26	68	22	15	51	42	9	46	29	19
7	28	27	Laptop	56	51.8519			24	20	71	52	29	23	34	27	25	24	29	48	64
9	17	15	Smartphone	80	74.0741			29	17	0	10	8	12	15	22	23	20	33	31	25
			Tablet	33	30.5556			17	22	0	10	2	30	19	8	11	15
85.1852	58.3333	61.1111	Television	12	11.1111			3	42	0	10	1	21	25	0	7	40
6.48148	25.9259	25						3
8.33333	15.7407	13.8889						20
108	108							108	108	108	108	108	108	108	108	108	108	108	108	108
								The above as %s
								10.9091	6.36364	33.6364	23.6364	61.8182	20	13.6364	46.3636	38.1818	8.18182	41.8182	26.3636	17.2727
								21.8182	18.1818	64.5455	47.2727	26.3636	20.9091	30.9091	24.5455	22.7273	21.8182	26.3636	43.6364	58.1818
					70.9091			26.3636	15.4545		9.09091	7.27273	10.9091	13.6364	20	20.9091	18.1818	30	28.1818	22.7273
					60.9091			15.4545	20		9.09091	1.81818	27.2727	17.2727	7.27273	10	13.6364
								2.72727	38.1818		9.09091	0.909091	19.0909	22.7273	0	6.36364	36.3636
								2.72727
								18.1818
