# Supplementary material for: Sensory determinants of the autonomous sensory meridian response (ASMR): understanding the triggers
Source: PeerJ. 2017 Oct 6;5:e3846. doi: 10.7717/peerj.3846 (PMC5633022; doi:10.7717/peerj.3846)
Supplement: Supplemental Information 3 — The dataset from the online questionnaire, stripped of potentially identifying information. [file peerj-05-3846-s003.xlsx]

## Sheet: Determinants of the Autonomous 
Demographic info								Hosted ASMR																													Non-hosted/Abstract ASMR videos
Q6	Q7	Q7_6_TEXT	Q8	Q11	Q12	Q13	Q13	Q16	Q17	Q18	Q19	Q20	Q21	Q22_1	Q22_2	Q22_3	Q22_4	Q22_5	Q22_6	Q22_7	Q23	Q25_1	Q25_2	Q25_3	Q25_4	Q25_5	Q25_6	Q25_7	Q25_8	Q42	Q26	Q27	Q28	Q29		Q30	Q33	Q34	Q35	Q36	Q37	Q39	Q46	Q47_1	Q47_2	Q47_3	Q47_4	Q47_5	Q47_6
Age	Gender choice	Gender text	Country of residence	Do you experience ASMR?	Do you specifically search for and watch ASMR videos online?	Do you specifically search for and listen to ASMR audios?	Do you experience Misophonia?	Is the video narrated? For this section, please recall one of your favourite ASMR videos that is hosted by a person/ASMRtist. Feel free to be as detailed as you like in your answers. Is the video narrated?	Where is the video set?	Is the setting private or public?	Does the video contain roleplay, or a simulated situation (e.g. a haircut)?	Is the video focused on an object?	Briefly describe the contents of the video (e.g. "The host gives the viewer a haircut")	Please rate the appearance of the physical environment - Clean	Please rate the appearance of the physical environment - Intricate	Please rate the appearance of the physical environment - Welcoming	Please rate the appearance of the physical environment - Untidy	Please rate the appearance of the physical environment - Bright colours	Please rate the appearance of the physical environment - Warm-looking	Please rate the appearance of the physical environment - Modern	Please briefly describe the physical setting of the video	How would you rate the atmosphere of the video? - Happy	How would you rate the atmosphere of the video? - Inviting	How would you rate the atmosphere of the video? - Clinical	How would you rate the atmosphere of the video? - Organised	How would you rate the atmosphere of the video? - Relaxed	How would you rate the atmosphere of the video? - Predicatable	How would you rate the atmosphere of the video? - Scripted	How would you rate the atmosphere of the video? - Dangerous	Does the video have a solid colour background?	What do you think makes this video most effective in helping you achieve ASMR? What makes it stand out above other ASMR videos?	When watching ASMR videos, how many triggers do you feel comfortable focusing on at one time?	Approximately how long, in minutes, is the whole video?	Approximately how long, in minutes, does the video spend focusing on each trigger?	Trigger Time Range Codes	Is there anything else about this video that you would like us to know?	Is the video narrated?	Where is the video set?	Is the setting private or public?	Does the video contain roleplay, or a simulated situation (e.g. a haircut)?	Is the video focused on an object?	Please briefly describe the contents of this video (e.g. "Waves crashing on the shore")	Does the video have a solid colour background?	How would you rate the atmosphere of the video? - Happy	How would you rate the atmosphere of the video? - Inviting	How would you rate the atmosphere of the video? - Clinical	How would you rate the atmosphere of the video? - Organised	How would you rate the atmosphere of the video? - Relaxed	How would you rate the atmosphere of the video? - Predicatable
25	7		England	1	1	2	1	1	1	1	2	1	The host makes candles and narrates it	1	1	2	7	5	1	4	A softly lit room with fairy light (bokeh) in the background	2	2	7	4	1	4	5	7	4	The soft methodical narrating of the process, the soft light and gentle noises (I.e wax dripping, stirring)	2	30 minutes	30	4		2	1	1	2	1	Hairbrushing without narration	2	3	2	5	3	2	3
25	6	Demisexual Biromantic trans woman and these categories are very poorly designed.	USA	1	3	3	1	2	1	1	1	1	Can't remember the specific one	1	6	2	7	3	3	3	At a table in a living room or kitchen	4	2	5	3	2	3	2	7	1	Empathic response to experiences of people in video.	1	10	0.5	1		2	2	1	1	2	Walking through the woods on crunchy leaves	4	1	1	7	5	1	2
25	7		Greece	1	1	2	2	1	1	2	1	2	Physical examination	1	2	1	7	3	1	2	Physiotherapist's clinic (roleplay).	1	1	2	1	1	2	3	7	3	I prefer hearing a soft voice, not whispering, so this video is the right one for me.	2	15	2	1		2	1	2	2	2	Fire crackling sound	2	2	2	7	2	1	2
25	7		USA	1	1	3	2	1	1	1	2	2	The host explains Chinese paintbrushes, various tea flavors, gives life advice, and tells stories about her childhood.	4	4	4	3	4	3	4	Usually footage of her desk with a teapot and teacup or art supplies. She might be drawing or painting.	2	4	6	4	1	6	7	7	4	There's no background noise so you can hear her voice more clearly, it's usually night time so she is talking softly so she doesn't wake anyone up, and the video is over 45 minutes long and I haven't heard it awhile.	2	55 minutes	N/A - this video is intermixed with triggers at random			1	1	2	2	1	Giving a tour of a museum.	4	2	2	2	2	1	5
25	7		Germany	1	1	2	1	1	1	1	1	1	The host shows viewer different items	2	4	2	6	5	3	3	Tidy, simple and ratet steril	4	2	2	2	3	2	2	6	3	The Gentleman movements and voice of the host	2	18	3	1		2	1	1	1	2	Animals being groomed	1	1	2	4	3	2	3
25	1		Germany	1	2	3	2	2	1	1	2	1	Plastic foil on a mic getting touched.	1	4	4	7	4	4	3	Women touching plastic foil on a mic.	3	3	6	6	4	4	4	7	4	High pitched noises.	2	7	7	2
25	6	Bi	USA	1	1	2	2	1	1	1	1	2	Host is dentist doing teeth cleaning	1	1	4	7	6	6	1	Dentists office - cold lights and modern look but still relaxing to me for some reason	4	4	1	1	6	5	1	5	4	I love clinical videos for some reason, because they're scripted and organized and "clean" like you said above. I find clinical noises (scraping, picking, cutting, mechanical) super relaxing	2	20	2 - 3 mins	1	I don't find clinical settings relaxing at all in real life, but the sounds are unique and not something I hear on a daily basis, so I'm not desensitized to them like I am to tapping or other sounds	1	1	1	1	1	Ear drops (in a tincture glass)	2	4	4	1	4	1	1
25	6	Bisexual female	USA	1	1	2	2	2	1	1	1	1	One of the girls plays with another girls hair (brushing, fingers through hair) and scratching her head and back	1	2	1	6	1	1	1	Indoors, in one of the girls bedrooms. Can see shoes on shelves	2	1	4	2	1	2	4	7	4	Specifically the way she scratches the other girls head, it's perfect	2	20	5	1	It's incredible
25	1		England	1	1	1	1	1	1	1	1	2	The viewer is given a haircut while the hosts speaks in a relaxed, conversational manner.	1	4	1	7	4	1	3	Not sure. I'm blind so can't explain. It was a hair cut sound slice from Heather feather.	1	1	7	2	1	4	5	7	2	The relaxed personal attention, coupled with multiple realistic brushing/styling sounds.	4	42	10	2	There is no picture in the video. It doesn't just focus on one trigger all the time. During the cutting section of the haircut, the viewer's hair is also brushed between each few snips. The entire process is taken very casually, without any constraints of time.	2	1	1	2	1	A fan is switched on and ossolates.	2	4	4	3	4	1	4
25	1		Germany	2	1	3	2	1	1	1	1	2	The host gives another person a head massage.	1	1	1	7	2	2	4	There is not much visible of the setting because the static camera focuses on the hands and the head, so the background is blurred. But in other videos the background can be seen as a tidy and welcoming living room of a typical student.	3	3	7	6	1	1	1	7	4	The sound of a scalp/the hair being scratched. This is a common trigger, but the audio quality is exceptionally good here. (I don't feel ASMR according to the normal definition; for me it is a state of deep relaxation and the feeling of human closeness.) Also, the female voice. I only watch videos which have soft, warm, soothing female voices.	1	3	3	1		1	1	1	1	2	Not a big difference, just a normal not-ASMR-intended (head)massage.	4	2	2	7	2	1	1
26	6	Bisexual	UK	1	1	3	2	1	1	1	2	2	Woman having her hair played with and brushed, with a head massage	4	5	5	2	3	4	4	Someone's living room	5	5	7	5	3	4	5	7	4	Concentration on touching the nape of the neck	2	9	9	2		2	1	1	2	1	Floor being mopped	4	5	5	3	3	3	3
26	7		USA	1	2	3	1	1	1	1	1	2	The host gives the viewer personal attention during a Cranial Nerve Exam	1	2	1	7	7	2	3	Room with blank walls with medical posters, a desk used for reception, a pointer used for exams	1	1	3	1	1	3	2	7	1	Organized, comforting, personal, interested in viewer's well being, materials ready and varied	2	30	3	1	woman conducting the video	2	1	1	2	1	music playing	3	2	2	5	4	2	4
26	6	Demi grey-asexual woman	United States	1	1	2	1	1	1	1	1	2	The host examines and cleans the viewer's ears.	1	4	2	7	7	2	1	Appears like a welcoming, but professional medical office setting.	4	2	1	2	2	1	3	7	4	The clarity and quality of the binaural microphone, the research and acting ability of the host.	4	36	7 - 10 mins	2		2	1	1	2	1	Grinding herbs with a mortar and pestle.	2	4	3	7	2	1	3
26	1		Argentina	1	1	2	1	1	1	1	2	2	The host whispers, not inaudible whispers but not soft	2	3	2	4	3	4	4	Small room with good illumination maybe because of bright coloured walls	2	3	4	2	2	3	5	6	4	The voice and accent of the host	2	30	15	3		1	1	1	2	1	Making a homemade telescope	4	4	3	4	2	2	3
26	7		Netherlands	1	1	3	3	1	1	1	2	2	The host is caring and nurturing atention to the viewer. The host feels geniune and wants to soothe the viewer. The host shows a range of products to also relax the viewer.	2	4	2	6	4	2	2	I am not so familiar with the phyisical setting since the host is the part I focus on. I am looking up the video now to see what the physical setting is. There is just the face and shoulders and arms of the host and a beige wall behind her. No embellishments or anything noticeable.	4	2	6	3	1	4	6	7	3	It doesn't necessarily make me feel the strongest ASMR - it makes me feel the most comfortable and at ease and content. I believe the hosts energy and nurturing nature in the video is what makes it my favorite. I feel like she is fully there for me.	2	38	6	2	She seems very relaxed herself (the host) during the video. Transferring her emotion works very effectively.	1	1	1	2	1	Host describing her collection of rings.	2	1	2	6	3	2	3
26	7		Uk	1	2	2	2	1	1	1	1	2	Host gives viewers spa treatments	1	2	1	6	3	2	4	Yellow wall with some brachytherapy decor and a blue light coming through a window	2	1	7	3	1	4	4	7	3	The asmrtist doesn't rush, words or actions. I notice that some others do, but this one takes her time and it's very calming. Additionally, she speaks close to the "ears" and mines touching the face, which is accompanied by sounds. These factors all contribute to it being a great video.	2	42 minutes	2 - 5 mins	1	No	1	1	1	2	1	Hands playing with cotton balls while whispering voice over	4	1	1	7	3	2	4
26	3		USA	1	1	1	2	1	1	2	1	1	The video I'm watching now is a librarian setting someone up with a library card. Lots of typing on keyboards, tapping on books, etc.	1	3	2	7	4	2	3	The setting is in front of a backdrop that has bookshelves on it to look like a library. The woman is dressed in a business casual bright red outfit. Professional looking.	1	1	6	1	1	4	4	7	4	The ASMRtist voice is soothing. She's the only one I really watch. She has a Russian accent. Her voice on any video makes me experience ASMR. the tapping helps as well.	2	1 day, 11:00:00	8	2	Just that the artist, gentlewhispering on youtube, is the best and deserves more recognition. She's got the ASMR stuff down. Best in the game.	2	2	2	2	1	Waves, ocean	4	3	3	6	4	4	4
26	7		United States	1	1	1	2	1	1	2	2	1	Whispering/Soft Spoken, Reading/Reviewing Comic Books, Page Turns	1	7	1	7	3	1	3	Top down view on a wooden table, clean and well-kept comic books	2	1	7	1	1	1	6	7	4	The content focus, page turning is gentle/slow/methodical, a nice voice (deeper, usually listen to women but I really like the lower tone of the man's voice in the videos), focus on content instead of the person	4	56 Minutes and 2 Seconds	56	5	No	1	1	2	2	1	Eating Swedish candies, mouth sounds, candy against bowl sounds	4	1	1	7	2	1	2
26	7		Australia	1	1	1	2	1	1	1	1	2	Westworld tole play by Phoenician Sailor.	1	1		7		7	1	Had a professional green screen which set a realistic scene. Top video andbsound quality. Edited very well. Great lighting.	1	2	1	1	2	4	6	7	4	Works off a familiar scence. Hosts voice is calming and has a good tempo. Asmr triggers are naturally part of the flow of the role play, not unnecessary	2	60	10	2	No	2	1	1	2	1	Hair dryer	4	3	4	5	4		1
26	1		United Kingdom	1	2	1	1	1	1	1	1	2	The host gives the viewer an eye exam	2	6	4	6	7	3	4	A plain room. Whote/cream walls.	4	3	3	3	2	3	5	7	1	The tone and temperament of voice - softly spoken or whispered. Low audio fidelity. Also one of the first videos to consistently trigger my ASMR.	2	20	4	1		2	1	1	2	1	Typing on a computer keyboard	3	4	4	1	2	4	2
26	3		United Kingdom	1	1	1	2	1	1	1	2	1	The host speaks to the viewer about their daily life including triggers.	2	6	3	6	4	3	3	In a lounge or living room	2	1	7	2	1		6	7	1	The soft-spoken whispering and attentiveness.	1	25	25	4		2	2	2	1	2	Soundscapes that are relaxing.	4	4	2	2	2	2	2
26	7		USA	1	1	2	3	1	1	1	1	2	The host gives a "spa" experience and blows gently from ear to ear with smoke, as well as lots of very soft whispering and hand movements	1	4	2	6	6	2	4	A soft neutral backdrop	3	2	4	3	1	4	3	7	1	The interaction and eye contact, as well as a "personal attention" role play	2	32	5 - 7 mins	2		1	1	1	2	1	Bath bomb demonstration	4	2	3	6	4	3	6
26	1		New Zealand	1	1	1	3	1	1	1	1	2	Assorted popular ASMR triggers	4	4	2	4	3	3	3	Apartment, drawn curtains	3	3	4	4	3	4	5	7	4	Contains multiple triggers that I prefer	3	22	8	2	Nope	1	1	1	2	1	Tapping on a leather couch	4	4	3	4	3	3	3
26	6	Pansexual Cis Woman	United States of America	1	1	2	3	1	1	1	2	1	The ASMRtist teaches us how to fold towels in fancy ways, very, very slowly.	1	5	3	6	4	3	2	The video focuses on Maria's hands folding bright white soft towels on a shiny black table, with a yellow wall and geometric wall art shown in the background and reflected on the table. Maria's nails are painted a glossy dark pink. Maria is wearing just regular clothes, all we can see are her jeans, her wristwatch, and the sleeves of her shirt.	2	1	3	1	2	1	5	7	3	The naturalness and simpleness of the task, the tone and gentleness of Maria's voice, the precision and the time taken with the towel folding.	4	18:31:00	The triggers sort of alternate and blend together throughout the video - she speaks as she folds and rubs out wrinkles with her hands. I guess a few minutes or so with each trigger if i had to divide it up.		I have not actually tried the skills I've learned watching this video, though I fully intend to. Also, Maria is consistently one of my favorite ASMRtists.	2	2	2	2	2	Rain pattering on a glass window during a thunderstorm	4	4	3	6	7	3	3
27	7		Canada	1	1	2	2	1	1	1	1	1	YouTuber Karina Satori's hair cut video. I especially like the part where there is a comb or fingers very close moving near my face	2	4	2	5	3	2	2	It is hard to see a lot of background she is so close. But she is on a couch with pillows. Her sweater is more focused on. Mostly muted colors except her comb is bright purple	1	1	7	2	1	1	4	7	4	I enjoy personal attention and realistic situations.	2	13	3 - 5 min	1	Sometimes a video won't always give me ASMR. Like it will become too familiar and wont work any more. So I will have to look for different triggers	1	1	1	2	1	Fairy char tingly balls of makeup Pearl face brushing salon. It is misty the sound of mage up brush in Pearl make up	4	1	1	7	2	1	1
27	4		Chile	1	2	2	3	1	1	1	1	1	The host makes a drawing of the viewer while describing her actions.	4	6	1	6	6	1	5	The host's bedroom. It's a clean, minimalistic and somewhat old-fashioned bedroom.	3	1	4	4	1	4	5	7	4	I feel this particular host has a very intimate approach and makes the viewer feel welcome and safe, there's no judgements or assumptions made of the viewer, just relaxing among friends.	2	I don't remember, the channel was taken down.	2 - 3 mins	1	The host didn't have good quality equipment at the time, so the video is slightly blurry and adds to the eerie atmosphere of it all. She also has a very particular way of speaking that is not inaudible, but pleasing.	2	1	1	2	1	Making and playing with slime. Different colors are used.	1	3	3	2	1	4	1
27	6	bisexual woman	USA	1	1	3	1	1	1	1	1	1	The host touches the viewer's face, cleans the face, puts on makeup.	1	6	1	7	6	1	1	Very simple, light colored background	2	1	5	2	1	2	5	7	1	The personal care and attention, the artist's voice, the artist's face, the artist's hand movements	2	13	10	2	N/A	1	1	1	2	1	The artist is displaying different nail polishes	2	2	2	6	1	1	2
27	6	Asexual woman	USA	1	1	3	3	2	1	1	2	1	(I don't have ONE favorite video, but in general) sounds are made with an object	1	3	2	6	5	3	3	A close up of the object making the noises / the object and the microphone	3	1	7	2	1	4	3	7	1	I don't know, the sounds made are effective to me as opposed to roleplay videos, which I don't like.	2	30	5	1		1	1	1	2	1	A knife is talked about and sharpened with water stones	4	4	4	3	3	5	5
27	7		Uk	1	1	1	1	2	1	1	2	2	Host taps on white balance card and talks about the sound of rain	1	6	4	7	6	3	4	An off white wall	2	3	6	1	1	4	3	7	1	White balance card is a somewhat unusual tool to be used. It is a bassy, repetitive sound similar to cardboard but not as harsh, which I thoughly enjoy	2	25	25	4		2	2	1	2	2	Wave crashing on a creaking ship as heard from the deck	4	4	4	7	7	2	6
27	6	Heteroromantic bisexual woman	Canada	1	1	2	1	1	1	1	2	1	Tapping a variety of objects close to mic	2	3	2	5	5	3	3	Sitting in her room, neutral Colors, tapping..	2	2	4	3	1	4	5	7	3	The type of trigger and her whispering voice. I don't feel asmr with all whispering voices.	2	30	5	1	Calm personality and talks slowly.	1	1	1	2	1	Make up brush tapping off excess make up before putting it on their face	3	2	2	4	1	2	2
27	7		USA	1	1	2	2	1	1	1	2	1	The host walks through a recipe book and talks about her favorite recipes.	1	3	1	7	6	1	4	The video is a closeup on the book and hands of the host turning through the pages. The book is Ina table with a small candle or 2 near it.	2	1	6	3	1	6	5	7	4	It's a combination of the delicate hand movements. the lipsmacking of the whispering, and the slow, unscripted nature.	2	25	20	3		1	1	1	2	2	The video is just audio ASMR with a loop of a strange video that looks sort of like slowly waving coral that slightly changes color during the course of the video.	4	4	2	7	5	5	7
28	7		South Africa	1	1	2	2	1	1	1	2	1	Discussing everyday objects	2	3	1	6	2	1	4	Warm, safe, welcoming, familiar	1	1	6	1	1	2	3	7	4	The way the artist carries herself. Her demeanor creates the perfect atmosphere.	1	40-50	10	2	More often the most basic videos have the strongest impact.	1	1	1	2	2	Massage turorials, instructional.	4	3	1	2	3	3	4
28	7		United Kingdom	1	1	3	1	2	1	1	1	2	The artist is a surgeon who subjects the viewer to various ASMR triggering stimuli.	6		3	2	6	6	6	The bedroom or attic room of the creator.	6	4	6	3	6	4	1	6	4	The artist gives the viewer a name which he then uses to refer to them through the video	1	60	5	1	The artist uses a combination of talking to the viewer and using a voice recorder device to make observations about his 'patient' (the viewer). This creates spells where the viewer is not required to pay attention and may even drift off to sleep.	2	2	2	2	2	Rain falling on canvas	4	2	3	6	6	1	1
28	1		United States	1	1	1	1	1	1	1	2	2	Inaudible Ear to Ear + Blowing in the Microphone + Whispering in Polish	4	4	4	4	6	2	4	Camera holds extended single shot of womans collarbone in button-up shirt as she rotates around mic with green-screen of blossoming tree in background.	4	4	6	4	2	2	4	6	4	Tons of hard 'K' sounds, and other mouth sounds that pop like bubbles.	4	25	8	2		2	1	2	2	2	I had to pick answers because there's no N/A option. I do not watch unintentional ASMR videos.	4	4	4	4	4	4	4
28	7		Norway	1	1	2	1	1	1	1	1	2	The hostess checks me in at a hotel and talks about some of the things to do in the area	1	2	1	7	3	2	3	Simple backdrop with a curtain or wall-paper with flowers. Good lighting, and close up picture of the hostess.	2	1	3	2	2	3	1	7	4	I like the hostess voice and the lip-smacking/gum chewing. I also like the personal attention, but without it being sexual in any way. It also contains some writing on paper and keyboard.	2	40	It isnÂ´t separated in to different triggers.		It doesnÂ´t contain any touching or brushing against the microphone, and its quite calming. The hostess ask me a variety of questions and writes down "my answers".	1	1	1	2	1	The narrator is displaying different rings and tells me different stories and information about them	2	2	2	3	3	1	1
28	1		USA	1	1	1	2	1	1	1	1	2	The host roleplays as a flight attendant.	1	4	3	6	4	4	4	The flight attendant is wearing a blue uniform, there is a black curtain behind her that takes up the whole frame. There are other seats around, but they are not really visible. The primary point of view would be one of a passenger in a plane.	2	2	6	3	3	3	2	7	2	I experience ASMR in day to day life. One of my earliest memories of ASMR, and one of my favorite real world triggers, is the presentation performed by the flight attendants prior to take off.	4	30 minutes	unsure, this roleplay is more about the experience rather than specific triggers.		Visual triggers, such as hand movements or other deliberate movements, are also a trigger for me. This video also contains "scripted movements" that are a trigger for me in addition to the sounds.	2	1	2	2	1	The video shows the process of a high end camera being made by hand.	4	3	3	3	2	4	4
28	6	Pansexual woman/Genderfluid person	USa	1	1	1	1	1	1	1	1	2	Follow the light	2	5	2	5	6	3	4	Indoors in front of a curtain	2	2	2	2	2	1	5	7	3	Light triggers work very well for me, binaural sound helps	3	30 min	25	4	no	2	1	1	2	1	Paint mixing	1	3	3	3	3	3	3
29	1		United states	1	1	1	1	1	1	2	2	2	Whispered facts about outer space.	1	4	1	7	3	1	3	In a room with leather chairs and mic showing at the bottom of the screen.	1	1	1	1	1	4	7	7	4	The whisper to a soft voice to a whisper again and the closeness to the mic.	1	About 30 min	30 min		The intro to the video is very relaxing which is why I watched it to begin with.	1	1	1	2	1	Tuning fork sounds.	4	1	1	1	1	1	1
29	6	bisexual woman	Mexico	1	1	1	3	1	1	1	1	2	futuristic travel agent	1	1	2	7	7	1	1	a green screen with a logo in the background and warm light coming from an indirect source	2	1	3	1	2	5	5	7	4	the performer has a good voice and shes very meticulous she specialises in personal attention and it shows	1	15	4	1	the special effects make it really stand out	2	1	1	2	2	a person out of camera is cooking	4	2	1	2	1	1	2
29	6	Bisexual	Scotland	1	1	3	2	1	1	1	2	1	The host carefully shows a collection of something, usually made from paper (for example, magazines), quietly whispering over the top. Host usually makes gentle hand movements and creates noises with the paper (for example, crinkling, or folding)	3	4	4	4	4	4	4	Indoors in a quiet setting	3	3	5	5	2	5	5	6	4	Has more of a natural feel rather than overly scripted studio kinds that you get. The asmr artist is particularly good at making videos... she is one of the most popular... she has very relaxing voice and mannerisms and i love paper sounds	1	30				2	1	1	1	1	Pages of a book being turned	4	4	4	4	4	2	4
30	7		USA	1	1	3	1	1	1	1	2	1	ASMRtist showing cards and journals while tapping on them and crinkling the packaging. Whispering and soft spoken and slow hand movementa	1	1	1	7	5	1	4	Library backdrop and a artist sitting at a table	4	1	6	1	1	4	4	7	4	The pace of speaking and movements is perfect for me. She very gentle crinkles and taps as opposed to fast movements or harsher whispers/speakinf	3	30?				1	2	1	2	2	Outdoor and indoor house tour with whispered narration and soft music	4	4	1	7	4	4	4
30	2		Uk	1	2	2	1	2	1	2	2	2	Indian head massage	6	3	6	1	2	2	7	Indian Barber shop. Untidy and not that clean.	4	2	6	6	1	5	6	7	4	The barber attitude and the sound of his breathing and the friction of his hands on the head.	2	10	10	2		2	1	2	1	1	Whitw noise: hairdryer	4	6	6	6	2	2	1
30	1		USA	1	1	1	1	1	1	1	1	2	The host gives the viewer a beard trim.	3	4	3	5	4	2	3	Set in what appears to be a bedroom but most details are blurred.	3	2	5	5	2	3	4	6	4	Soothing voice with varied trigger sounds.	2	20	3	1		2	2	2	2	2	Rain drops falling on a plastic bag.	4	5	4	6	7	1	6
30	1		USA	1	1	1	3	1	1	1	1	2	The host gives the viewer personal attention, waves their hands slowly and in a low voice, narrates the video.	1	5	1	6	6	3	5	An apartment, or some type of residence.	2	1	5	4	1	6	7	7	4	It's a combination of things. One is that not all triggers work all the time. I build up a sort of "tolerance" to certain triggers as I watch them more often. This video uses different stimuli than I have used recently. It's also a long video. Tingles can last for a long time if you choose a long video. As soon as it's over, you'd have to rewatch it (with a reduced effect) or hope you find a new …	3	45	45	5		2	1	1	2	1	Someone is fidgeting with what looks like a toy or gadget.	1	4	4	3	2	2	6
30	7		United States	1	1	1	1	2	1	2	2	1	Girl uses her hands to play with plastic and scratches manicured nails on different surfaces	1	1	1	7	1	2	1	All is dark except what she is doing with her hands					1	6	3	7	4	Sound and visual combined	1	5 minutes	5 minutes	1	It was simple and used ASMR in constant transition throughout. Start to finish .	2	2	2	2	2	It was a nature walk in the woods , you could hear leaves crunching under foot, water flowing through a ravine and claws scrating on tree bark.	4	1	1	4	2	1	2
31	6	Bisexual Woman	United States	1	2	3	1	1	1	1	1	2	Host gives viewer a medical exam	2	6	3	6	2	3	3	It's a close up on host with only viewable background being a poster/wallpaper in black & white with a line of phone booths falling like dominoes. They're each a different color of the rainbow.	3	2	3	3	2	5	3	6	4	Soft spoken, writing noises, personal attention	4	22			There's also follow the light & finger triggers & positive affirmations	1	1	1	2	1	Pop up book being read	4	2	2	6	5	2	3
31	6	Bixexual woman	Netherlands	1	2	3	3	1	1	1	1	2	Host does make up	2	2	2	6	6	2	3	In a bedroom i believe	2	2	6	2	2	3	6	7	4	Sounds and the way it is done	3	30				2	1	1	2	1	Someone brushing model cars	4	2	2	3	2	2	2
31	7		UK	1	1	2	2	1	1	1	1	2	Role play of being taken care of, head massage, host is very attentive and soft spoken.	3	6	2	6	6	2	4	cant see much of the background as the host is up close to camera	2	2	6	4	2	4	6	7	4	I think it's a mix of everything, soft spoken words, the rustling noises, what is being said and the language used, the hosts voice too.	2	40	10	2		1	1	1	2	1	Tapping on various different objects	2	3	2	5	3	1	2
31	1		United Kingdom	1	1	2	3	1	1	1	1	2	The host performs an eye examination/medical examination	2	6	1	7	6	2	4	Black background. Indoors	2	3	2	2	1	4	2	7	2	Whispering. Medical setting. Flashlight work	1	17	5	1	Na	2	1	2	2	2	N/a - Dont watch these kind of videos	4	4	4	4	4	4	4
31	7		USA	1	1	1	1	1	1	1	1	2	The host treats the viewer to a facial spa treatment.	1	4	1	7	4	1	4	Set up as if you are seated in a reclining chair, looking at a colorful sign that says, "Spa". You can't see much else besides the host, otherwise.	1	1	4	1	1	4	1	7	4	The host's soft voice, the sounds she uses (steam machine), the sound of her lab coat, etc.	1	35	5	1		1	1	1	2	2	Certain cooking video tutorials	4	1	1	7	1	1	4
31	7		Georgia	1	2	3	3	2	1	2	2	1	short video about manufacturing Leica camera, its bag & details.	2	6	4	6	3	4	4	a factory, but zoomed toobject, cant see much.	4	4	4	1	2	6	6	6	4	its realness and very strong professional detail orientation	2	3	0.3	1	its loud and distracting sometimes but again one of the bets triggers for me, much better than simulations or fake asmr videos.	2	1	1	2	1	Japanese crafts	4	3	2	6	2	2	5
31	1		USA	1	2	3	2	1	2	1	1	2	Riding in front seat of car on office lunch break	4	4	3	4	4	4	3	POV of front passenger seat of car	3	4	5	5	2	2	3	5	4	It's 100% the opening line, "let's go get some lunch." The rest I don't even remember much of. I am yet to be triggered by another video; unclear why this one works. It's something about the mundane, friendly delivery of that line. It's not as overwrought of a roleplay as others.	1	Don't remember	0			2	1	1	2	1	Not video. Binaural audio of a Tic-tac container, or something similar, being walked around and shaken.	4	4	4	3	4	3	3
31	3		Canada	1	1	3	1	1	1	1	1	1	The host shows the viewer pages from various coffee table books.	2	2	2	6	5	2	4	A traditional library looking background.	3	3	4	2	2	2	6	7	4	The page sounds, pointing, and the mostly unscripted narration.	1	30	15	3	No	1	1	1	2	1	Leading through a newspaper flyer and circling items with a squeaky marker.	4	3	3	5	2	2	5
32	1		USA	1	1	2	3	1	1	1	1	2	I cannot watch one particular video multiple times in a row and still produce the same effect. Although I can return to specific content again for response at later date. Favorites include "Realistic Barber Role......Cosmic Tingles ASMR.	1	2	1	6	4	2	4	Made to look similar to barbershop with mirror, chairs, and towels/small items on some shelves	2	1	3	2	1	4	4	6	4	Although I do like personal attention videos I feel sound is the most important aspect. The crinkly sound of razor vs hair or medical gloves is one of my favorite.	3	30	10	2	The same artist does another barber video I do not like. I also don't enjoy some of the most produced asmrtists as well, my largest enjoyed video selection is from ASMR Glow.	2	1	1	2	1	Playing with kinetic sand	1	4	3	3	3	2	4
32	7		UK	1	1	3	3	1	1	2	1	2	The host gives the viewer a spa treatment including a face mask, a head and neck massage and hairbrushing accompanied by softly spoken narration and positive affirmations. Part of the video is performed in the dark with a bright light used to perform some skin extractions.	2	2	1	6	5	3	2	Looking at a wall with a sheer material cover with a few wooden style decorations. Part of the video is spent looking at the ceiling, which is plain and light coloured. The whole video has a neutral colour overall.	3	1	5	2	1	5	5	7	4	The personal attention and soft voice. Immersion and plausability are also very important.	3	25	5	1		1	1	1	2	1	The ASMRtist plays with various materials, tapping them and touching them to create soothing sounds.	4	3	3	7	3	2	6
32	6	Demisexual/Pan-Demisexual	USA	1	1	2	1	1	1	1	1	2	Host (sitting at a desk) registers the viewer into a database by asking them questions and entering the data into a computer.	1	3	2	7	5	6	2	â€¢ Small, artificially lit patient exam room (office/hospital ceiling tube lights). â€¢Sterile/medical setting. â€¢Some non-threatening medical equipment and medical hand tools). â€¢No loud extraneous noises (some nearly inaudible, unintentionally ambient, electrical/mechanical humming/buzzing/clicking/whirring that does not detract or distract from situation). â€¢ "Emotionally Neutral" (ie: giv…	4	3	1	2	4	2	1	7	4	Two things which require a fair amount of explanation (sorry!): What it does: Recreates a data-gathering appointment realistically. There are awkward gaps in conversation, quiet key clacking(patterned clacking like words being entered and not key mashing), the clerk talking to themselves/making noises people make with entering data real-time, and there are changes in their speech(not monotone whi…	4	20 minutes	One main focus with several small ones organically occurring.		It's one of a few in my "C-PTSD Playlist" that I've never gotten to the end of. The ASMR response from it is so intense that I "pass out" (fall asleep so fast -within 10-20 seconds of starting the video - that I don't remember closing my eyes). It's part of my emotional recovery aftercare when re-experiencing traumatic memories and PTSD-related anxiety attacks, and is also a preventative tool for…	2	1	1	2	1	Unpacking Japanese "squishy" toys. Some are wrapped in cellophane.	4	4	4	5	4	2	2
32	6	Pansexual	Usa	1	1	1	1	1	1	1	1	1	A salesperson shows different candies and describes them, then packs them in to bag for a party.	1	7	4	7	7	4	2	All black. Black walls, black table. The background is meant to be completely non-distracting from the objects being shown.	2	3	1	1	1	2	1	6	2	I'm honestly unsure. It may be the slow and even tone of the ASMRtist. But I due usually get triggered more easily by videos that present a lot of information in an organized manner, particularly when they describe colors/flavors/scents etc. Describing a food or drink list or menu is a very easy trigger for me.	2	30-45?	1 - 3 mins	1	The microphone quality is excellent and there is no unintended background noise. The ASMRtist also focuses on hands and hand movements a lot in this video and her physical care in manipulating objects is a major trigger as well.	2	1	1	2	1	Oragami folding	2	4	4	1	1	4	3
32	7		norway	1	2	3	1	1	1	1	1	2	the host tries on clothes on the viewer	1	2	3	3	4	4	4	a clothes shop	3	3	2	5	4	5	4	6	4	a lot of the right triggers; personal attention, thinking, saying what they're thinking out loud slowly, detailed	3	40	it's not split up in triggers			2	1	1	2	1	japanese person trying out various japanese snacks	2	4	4	1	2	4	2
32	3		USA	1	1	3	1	1	1	1	1	1	The host(ess) pretends to sell the viewer cosmetic products.	1	3	2	6	4	3	2	Inside a home.	2	1	7	2	1	6	7	7	1	The host(ess) speaks with a particular accent and pretends that she has been waiting for me/is happy to see me again.	2	20	20	3
32	3		Uk	1	1	1	1	2	1	1	1	1	Host cleans a keyboard	1	1	1	7	4	1	4	Just a focus on the keyboard and the utensils and products being used to clean it	1	1	4	1	1	4	4	7	4	The use of varied methods to clean the keyboard	2	30	10	2	No	1	1	1	1	1	Someone ironing a shirt	4	1	1	4	1	1	4
32	7		USA	1	1	3	2	2	1	1	2	1	Chiropractic exam	1	4	2	7	7	4	4	Typical doctors office	2	2	1	1	1	2	3	7	1	Intricacy of exam	1	8	8	2		2	1	1	2	1	Organizing clothing	1	1	1	4	1	2	2
32	3		USA	1	2	2	2	1	1	1	1	1	host pretends to do an infomercial on futuristic clothes hangers	1	1	1	7	4	3	1	a futuristic office building	1	1	4	1		4	5	7	4	the hosts voice and precise mannerisms	3	10	10	2		1	1	1	2	1	someone off screen moving marbles around	3	1	1	7	7	1	7
32	7		Finland	1	1	1	2	1	1	1	1	2	All sorts of personal attention such as a haircut, spa treatment, massage, make-up application and so forth	1	3	1	6	4	3	2		2	1	3	2	1	4	2	7	4	Excellent sound quality with close to no outside disturbances at all	2	45	5	1
33	7		Uk	1	1	3	2	2	1	1	1	2	It's of a girl giving a man a face massage with very detailed and repetitive movements	1	7	4	7	7	4	3	It's quite close up so no real background I think the wall behind is painted white	4	2	1	1	3	1	7	7	1	It's the girls hand movements on his face	2	15	15	3							I can't complete this as I haven't found asmr in any natural form only videos I've specifically searched for and people in real life
33	7		USA	1	2	2	2	1	1	1	1	1	The host is whispering to and "touching" viewers face, hair, playing with different objects and their sounds- variety of noises	1	4	3	7	4	2	3	Very plain - host, table, ear shaped microphone, and nothing on walls or anything.	3	3	2	3	3	4	3	7	4	The variety of noises made and the special ear shaped microphone intensifies the sounds makes them seem more real. I enjoy variety in a video though not exclusively.	3	10 minutes	2	1		2	1	1	2	1	Tapping/scratching sounds on wood	4	2	1	6	3	1	4
33	6	asexual woman	United States	1	1	1	1	1	1	1	1	2	The host gives the viewer an argan oil hair treatment, scalp massage, and hair brushing while they and the viewer sit in a darkened room lit by a fire and candles.	1	3	1	6	6	1	3	The video is a close up of the host's face with a wall and candles visible in the background. She is lit from the side by the fire.	1	1	7	2	1	2	3	7	1	The colors are warm and the overall environment is darkened and intimate. This particular host is very triggering for me because she does not go out of her way to try to create a triggering sound, for example some ASMRtists will focus on brushing the microphone, which triggers misophonia for me. She brushes the microphone incidentally, without focusing on it, which is a trigger for me.	1	30	5	1	The host also engages in slow, deliberate hand motions and soft speaking. She also has an English accent, and non-American accents can be very triggering. The video is so effective at causing ASMR for me that just thinking about the video is triggering a response.	2	1	1	2	1	It's a very short video of a woman with nicely manicured hands stroking and petting a pet rat.	2	1	3	7	6	1	1
33	7		USA	1	1	2	1	1	1	1	1	2	The host is selling handbags in a qvc style manner.	1	1	1	7	7	3	2	The lighting isn't too bright, white background her clothing isn't overwhelming.	1	1	5	1	1	4	1	7	1	Tone of voice she alternates between soft spoken to an almost inaudible whisper, not alot of props.	2	20 minutes	3	1
33	7		Uk	1	1	3	3	1	1	1	1	1	The host gives the viewer an eye exam	1	5	3	6	5	4	2	Office type room	4	3	2	2	3	2	3	7	4	Strong focus on personal attention. Close up examination.	2	20	10	2		2	1	2	2	2	Beach sounds	4	2	2	6	6	2	2
34	7		U.S.A.	1	1	1	2	1	1	1	2	1	Done by Gentle Whispering called Simple Pleasures. I rarely watch the video, just audio. This is mainly due to the fact that I want to sleep and do not want the light from the screen to keep me awake. Marina's soft spoken voice triggers me. Videos where she is wearing a crinkly shirt trigger me best. Also when she brushes hair (sound).	2	6	2	6	4	4	4	Simple backdrop. Can't remember color. Focus is more on Maria than enviorment.	3	2	2	2	2	2	4	7	1	Maria is in it. The artist is the biggest factor. Her voice triggers me better than any other artist. And again, a video with Maria in a crinkly shirt giving personal attention close to her microphones will always trigger me best.	3	40 min	5-15 min	2	I need to watch other video's as well because overtime the stimulation of any one video decreases. After a break I can go back to it. The same can be said for ASMR video's in general. Overexposure decreases the sensation.	1	2	2	1	1	By WhispersCrystal, who no longer is an ASMR Artist and only had a backdrop up while she spoke. It is a role play set on a beach spa. You are the guest. She goes over a list of drinks and prepares it and then you get a massage.	4	1	1	7	4	2	3
34	1		England	1	1	3	1	1	1	1	2	2	Inaudible close up whispering	1	4	4	6	6	3	4	Bedroom	2	3	6	4	2	4	4	7	1	The friendly soft spoken none sexualised women	1	20	15	3	No	2	1	2	2	2	Glittery makeup application on hand	4	2	4	4	4	4	6
34	7		USA	1	1	3	1	1	1	1	2	1	Maria from Gentlewhispering on youtube recently released a video where she provides intructions on the proper way to iron clothes. She uses a soft spoken narative and its very quiet and soothing and the noises are a bit repetitive which is heaven. Takes me back to being a kid watching my mom iron.	1	5	1	6	5	3	4	A close up of her ironing board in her bedroom. You only see her hands through 90% of the video	2	1	6	2	2	3	4	7	4	Nostalgia, repetition, and simplicity	1	I think like 30-40 min	30	4	Maria is an expert. Her triggers are similar to mine so I go to her often. Her russian accent also helps. For me asmr videos with accents are especially effective. I dont know why.	2	2	2	2	2	Sounds of a park with children playing in background	4	1	1	7	4	3	2
34	7		USA	1	1	3	3	2	1	1	2	1	Person is eating with a natural form of lip smacking, not exaggerated. They are gently handling the food using chopsticks and gently unwrapping food in package.	1	4	1	7	3	2	2	Simple. Wood table and place setting up close to the camera. Van Gogh painting in the background.	3	2	6	2	1	4	4	7	4	The gentle mannerism of the person making the video.	3	20	5-10 mins	2
34	7		US	1	1	1	2	2	1	1	2	1	I don't actually like most ASMR artists. I very much prefer unintentional ASMR. Watching certain home shopping hosts, massage tutorials, crystal healers, energy healers, product demos etc. I've had certain college professors that spoke a particular way. Role play doesn't do it for me. It's like watching sex (I am in no way turned on by ASMR) but I like real genuine sex but porn does nothing for m…	1		2		6		4	I don't like settings where in the focus I like watching something being done	2		4		1		7		4	The sounds of objects and clinking and hand movements but NOT incessant tapping. Don't just tap to tap! Do something	2	1 hour	zero. Should be an overall experience		It's gemstone therapies with Isabelle Morton	2	1	1	2			4	1	1	4	4	4	4
34	1		Canada	1	1	1	2	1	1	1	2	2	The host uses a unique microphone setup (3Dio binaural microphone on one side, a single mic on the other) to produce highly sensitive sounds with a remarkable echo effect. Uses a number of items to produce sounds, primarily tapping, and also speaks into the microphones.	1	2	2	6	3	4	1	The host is visible from the chest up in comfortable clothes, facing the camera. The microphones are on either side of the host. The background is a digital image of black and blue cubes created using a green screen.	3	2	2	1	3	3	6	7	4	The remarkable and unique echo effect on both the items tapped and scratched, and the host's voice. The hand motions are also effective, to a lesser extent.	4	23	4 - 8 mins	2	The host has a distinct eastern European accent which, for some reason, acts as a trigger in and of itself.	2	1	1	1	2	The video features a still image of a pair of cotton swabs. The audio is a simulation of a visit to a otorhinolaryngologist, and includes 3D audio of the sound of a person walking around the listener, writing and typing notes, spraying and wiping hands, putting on gloves, handling/cleaning ears, etc.	4	4	4	1	2	3	3
34	7		Sweden	1	1	3	2	1	1	1	1	2	The host uses aromas, colors, water sprays and whispering to balance the chakras of the viewer.	3	4	2	5	2	2	3	Black background, colored circles, some flowers.	3	2	6	5	2	1	4	7	2	Even sound levels, nice combination of sounds and personal attention. Does not mention asmr. I do not believe in chakras etc whatsoever but that is unimportant if it is a good video.	2	43 min	Don't know, they interlap
34	7		Denmark	1	2	3	2	1	1	1	1	2	Scalp massage with narrator	4	4	4	2	7	2	6	Average living room	4	4	7	7	1	4	7	7	4	Not scripted	3	20	5	1		2	1	1	2	1		1	4	4	2	2	2	2
34	1		USA	1	1	1	2	1	1	2	1	2	A man opens an essential oil diffuser and demonstrates it. Also, Ally Maque host a customer in a candy shop. Amazing.	1	2	2	7	2	2	2	1. in the man's home. 2. in an imaginary candy shop	2	1	4	2	2	4	6	7	4	The voice(s) are calm and dry; soft chewing and crinkling; reading off descriptions of products is very soothing.	4	Around 30 minutes	Not sure; it's too relaxing to focus on such things.		A little sarcasm and laughter doesn't hurt; it's happy-making.	2	1	1	2	1	Woman eating a crispy, Vlassic pickle.	4	2	2	5	5	2	4
35	1		United States of America	1	1	2	3	1	1	1	1	2	The host is massaging the viewer's head	4	4	1	4	4	3	3	Just a plain room	1	1	5	4	2	2	6	6	3	Personal attention	1	35	5	1		1	1	2	2	1	The process of making crayons	4	2	2	3	2	3	6
35	7		Spain	1	1	3	2	2	1	1	2	1	A woman with very long nails tapping on a box and then making rustling noises with the contents of the box.	3	5	2	5	4	3	4	I'm not sure. Looks like a bedroom. The woman is sitting at a table. I don't recall much about the background. There's natural light though, I think, coming from a window.	3	2	6	4	1	4	5	6	4	I don't like it when there's narration, and this one has no speaking. I also like the fact that she does the same action for a long period of time. I find it harder to get into and enjoy it when I know whatever's happening is going to suddenly stop and change to something else.	1	30	12 or so	3	The tapping noise and the visuals combine to make it relaxing.	2	1	2	1	2	Man having a head massage	4	2	3	6	6	3	6
36	7		Mexico	1	2	3	3	1	1	1	1	2	The host does makeup and hair to the viewer	5	2	1	4	3	1	5	Lots of posters on the back wall, camera is on a table, she's seen only from chest up, she speaks softly and moves her hands as she speaks, takes objects and shows them to the viewer describing how it's gonna work. She has big eyes and rings on her fingers.	3	1	6	5	1	3	5	7	4	She seems like a genuine person, not scripted, not ambitious, she has a sweet voice and an innocent appearence, like she's doing it because she likes it, not to make money as other youtubers	3	15	15	3	She uses all of the triggers all the time, voice, scratching sounds, movement of hands, engaging in caring for the viewer. Anyway voice is not a trigger for me.	2	1	1	2	1	Progression of drawings	1	4	4	4	3	2	4
36	7		United States	1	1	1	1	1	1	2	2	1	Female discuses and goes through the process of cleaning, filling, and smoking a pipe.	1	2	2	7	5	3	3	The video appears to be filmed in the host's kitchen, while she's seated at a table.	3	2	7	2	2	2	4	7	4	A combination of elements: the speaker's voice (tone, volume, and speed), combined with slow but deliberate hand movements, and the sounds from handling the objects.	3	25				2	2	2	2	2	Rain on a tent	4	2	1	7	7	1	2
36	7		USA	1	2	2	1	1	1	1	2	2	The person explains/instructs how to do something.	2	4	2	6	4	3	3	office or workshop	2	2	6	2	2	4	6	6	4	The detailed explanation and instruction in a soothing voice.	1	5	5	1		1	1	1	1	2	a person giving a haircut and shave	4	2	2	6	2	2	4
36	1		Scotland	1	1	1	1	1	1	1	2	2	The video I was picturing is one that always comes to mind and was one of the very first i ever came across. It was of MalASMR on YouTube at work, recording 15 minutes or so of her doing mainly administrative tasks. At one point she picks up a sealed plastic bag of stationery and begins to crinkle it in front of the camera. The sounds and the ambiance of the office were enough to trigger the phen…	4	4	4	4	4	4	4	In an office.	2	2	4	3	2	4	6	7	4	It was one of the very first videos I'd seen that triggered the response, outside of real life.	2	15 minutes	1	1	Said video: https://www.youtube.com/watch?v=xU95b_67c1U	2	1	1	2	1	Assembling a Japanese toy-like food from a prepackaged product.	4	2	2	2	2	2	2
36	6	hetero romantic asexual	Germany	1	1	2	3	1	1	1	2	1	Someone makes sounds with certain items	2	4	3	6	6	2	3		3	2	6	4	2	4	4	7	3	strong crinkly sounds	1	30min	25min	4		2	2	2	2	2	Sounds of a sailing boat on sea.	4	4	4	7	7	4	3
36	7		Usa	1	2	2	1	2	1	1	2	1	Someone turning pages in a book and a magazine	2	6	2	6	4	3	4	Just focused on the book pages	4	4	4	3	3	3	5	6	3	The sounds of the pages turning	2	1 hour	45	5		2	1	1	2	1	Pages turning	3	4
36	7		United States	1	1	3	2	1	1	1	1	1	The host talks gibberish and with an accent. He does repetitive tasks and makes things.	2	3	1	6	2	2	2	Work desk with a green screen background of a lab.	2	2	5	2	2	5	3	6	4	The gibberish talking and technical terms. The specific sounds he makes with his objects.	4	45	30	4		2	2	2	2	2	Trees blowing and wind and rain sounds	4	2	2	7	4	1	1
36	7		UK	1	2	3	2	1	1	1	1	2	The host gives the viewer an eye test	1	1	2	7	6	5	2	Optician's room so medical style but private.	4	4	3	2	2	2	4	7	4	Realistic	2	45	Not sure			2	1	1	2	1	Colouring in	1	4	4	4	3	3	2
37	7		UK	1	1	3	3	1	1	1	1	1	Host demonstrates books to viewer.	1	6	2	7	4	3	4	Indoors, table with host sitting opposite viewer. No props other than books and a small handwritten sign on wall.	2	2	5	1	2	4	3	7	1	Books - sounds and touching.	3	40	7	2	Contains close up whispering towards the end which increases tingles for me.	2	2	1	2	1	Camp fire	4	3	1	7	4	1	2
37	7		United Kingdom	1	1	1	2	1	1	1	1	1	Facial massage tutorial	1	6	2	6	5	3	2	Make up studio	2	2	2	2	1	2	2	7	1	Calm voice.	2	25				2	2	2	2	1	Murmuration	4	3	2	6	6	2	2
37	7		USA	1	1	2	2	1	1	1	2	1	The host opens a bath bomb kit and makes bath bombs	1	5	2	7	6	3	5	Sitting at at a table	3	3	5	2	1	2	5	7	1	Whispering, hand and facial movements	2	30	20	3	Natural and not forced or scripted	1	1	1	2	1	Scrapbooking	4	2	2	6	3	2	2
38	7		Denmark	1	1	1	1	1	1	1	2	1	The host is tapping, scratching microphone and whispering	1	2	1	6	5	1	1	Very little detail in the room, white wall	1	1	7	1	1	1	5	7	1	Specific sounds, speed and volume of host speech	2	30	10	2	Very relaxed, slow paced video	1	2	2	2	2	Sound of snow crunching	1	1	1	4	1	1	1
38	7		Wales	1	1	1	2	1	1	2	2	2	The host eats crunchy food and whispers	1	2	1	6	5	2	4	In a room with bare furnishings	1	1	6	4	1	3	6	6	1	The hosts tone of voice and the crunching noises	4	20	20	3		2	1	1	2	1	Dog chewing rawhide	1	2	2	6	4	2	4
38	1		Usa	1	1	3	2	2	1	1	1	2	The artist is fixing up the users head.	1	4	1	7	6	4	2	There is little setting to it. It's a blank background. The angle is so tight you mostly see the artist face.	1	1	2	4	1	3	3	7	1	Strong personal attension. It makes you feel as I'd the artist is in the room with you.	1	40	5	1	The artist is a very pretty girl. Exploring gender issues would be a good topic for future research to women prefer male/female artist to what degree, etc.	1	2	1	2	2	Nature walk.	4	2	2	6	4	1	2
38	7		New Zealand	1	1	3	1	1	1	1	2	1	Rubbing, brushing the microphones	1	6	2	6	6	2	4	Black background, asmrtist on screen seated. View from chest to nose (top of head not visible), hand gestures prominent	1	1	6	3	1	3	6	7	2	The specific quality of the sound - the binaural mic rubbing. I respond best to long, continuous sounds.	2	45	45	5	The content creator has a very relaxed and pleasant presence.	2	1	1	1	1	Ear cleaning	2	4	3	3	2	3	2
38	1		USA	1	1	3	2	1	1	1	1	2	The host is fitting the viewer for a suit. My 2nd favorite is one depicting the host giving the viewer a haircut and shave.	1	4	1	7	4	2	4	A living-room meant to portray the host's suit store/barbershop.	2	2	6	2	1	2	4	7	4	The tone of the hosts voice and accent, his eye contact, smooth movements/gestures, and level of detail regarding knowledge of portraying a realistic suit-fitter/barber.	3	30	25	4		2	2	2	2	2	Monkey grooming a person's hair.	4	1	2	4	4	2	6
39	7		USA	1	1	2	2	2	1	1	1	2	Skin analysis/spa treatment	1	2	1	6	3	2	2	Soft lighting in a staged spa setting using real props rather than a video backdrop/green screen	2	1	3	2	1	6	4	7	4	Soft spoken, careful personal attention and consistent volume	2	40	7	2	No	1	2	2	2	2	Nature walk with bird sounds	4	2	2	6	4	1	6
39	7		USA	1	1	2	1	1	1	1	1	2	Gentlewhispering Flight Attendant simulation.	1	2	1	7	7	2	5	Simulated airplane seat with aisle.	1	1	5	1	1	2	2	7	2	Relaxing voice, personal attention, airplane white noise,	2	35	30	4	Just one of many I love.	2	2	1	2	2	Building a hut in woods	4	2	1	7	3	2	2
39	1		Uk	1	1	1	2	1	1	1	2	2	It's a tutorial on how to sew a costume. Details on measuring, cutting, folding etc.	4	1	4	4	4	4	4	Girl in her room, close up videos of her desk and sewing machine. Various lighting.	3	4	5	5	2	6	4	7	4	I like tutorials and instructional videos. 'Accidental ASMR' videos work best though some scripted ones work too. Mainly soft spoken, whispering is too far the other way.	2	30+	30	3
39	7		usa	1	2	3	1	1	1	1	1	2	host gives viewer a medical checkup	1	2	1	7	4	3	2	doctors office	1	2	2	2	1	3	2	7	4	the host is very gentle and caring in her voice and facial expressions	3	40	5	1		2	2	1	2	2	rain on a roof	3	1	1	4	4	1	1
39	7		USA	1	1	3	1	2	1	1	2	1	The host scratches a friends back. ASMR videos usually do NOT work for me if I can see either the host or models faces.	2	6	4	6	6	4	4	Camera focused on the back of the person receiving the back scratch, only a few peripheral items visible in room	4	4	3	3	2	2	6	7	1	No talking, scratching sounds clear, no faces seen, I enjoyed the rhythm and hand movements of the back scratch as how I would like to have it done to me	1	10	10	2		2	1	1	2	1	This question doesn't apply to me, I don't watch videos like this for ASMR	4	4	4	4	5	4	4
39	6	it's complicated. female	usa	1	1	2	1	1	1	1	2	1	The host interacts with a variety of objects - accidentally clinks together and purposefully moves around stones and glass beads, makes scratching sounds on a carpet, smoothes out or scratches two towels, taps book covers, etc. She only has brief moments of narration to introduce the objects and then there are a few minutes of just sounds.	2	4	1	5	4	3	4	in her home. can't see much of the setting except for carpet. looks somewhat sunny.	3	1	6	4	3	3	5	7	3	the sounds,colors, different materials, the purposeful movements, the friendliness of her face and voice, the warm atmosphere. But you just said to choose one video there are other very different videos that are effective too.		20	4	1		2	2	2	2		frozen lake and iced over tree - wind sounds, sounds if cracking ice and ice sheets clicking against each other from the waves	4	4	3	7	6	4	3
41	1		Canada	1	1	1	1	1	1	1	1	1	Haircut with whispering and scissor snipping sounds.	2	2	2	7	6	2	2	Dark room with soft lighting	3	2	6	2	1	4	6	7	3	Soft whispering and gentle scissor noises combined with short, relaxed hand movements.	2	23	20	3	no	2	1	1	2	1	Hair dryer turned on in a bathroom	3	2	3	4	3	3	4
41	7		UK	1	2	2	2	1	1	2	1	2	Similar to a haircut roleplay but this is a bit more creative the idea being they are putting an experimental paste on your head that is supposed to help with headaches. Always gives me great tingles and helps with headaches. I've been listening to this same video for years.	4	4	4	4	4	4	4	There is no actual visuals in the video but you are imagining it taking place in a spa.	2	1	1	1	4	6	4	7	3	I think as it has lots of noises going on around the head. The element of personal attention is also a trigger and also the ASMRtists voice is a trigger.	3	14	lots going on at same time....but maybe 1-2 minutes with certain actions			1	2	2	2	2	relaxation meditation on the beach	4	1	1	6	2	1	2
41	7		Netherlands	1	2	3	2	1	1	1	2	1	The host uses a make-up brush and strokes the microphone while almost inaudible whispers.	2	6	1	6	6	3	3	In a living room with paintings in the background and dimmed light.	3	3	3	2	1		3	7	3	The almost inaudible whispers in combination with brushing.	2	40 minutes	25 minutes	4	No	1
42	7		Canada	1	1	3	2	1	1	2	1	2	Spa treatments	1	2	1	7	7	1	2	Soft lights in the background	1	1	2	1	1	4	4	7	4	The woman's accent	4	25				2	2	2	2	2	Forest sounds	4	1	1	7	4	1	4
42	7		usa	1	2	2	2	1	1	1	2	2	host quietly narrates a story he is drawing	2	5	5	5	5	5	5	totally irrelevant	4	4	6	4	2	4	7	7	3	combo of voice and drawing. hard to pin down what qualities of voice but probably slow, and good...what in music you would call "phrasing"	2	40	40	5	Toni bomboni made it. look him up he's awesome!	2	1	1	2	1	wood pencils	1	2	4	7	1	4	1
42	7		Canads	1	1	2	2	1	1	1	1	2	The host applies and describes makeup. She has a British accent.	3	4	3	5	4	4	4	It looks like a generic room.	4	3	6	2	3	4	5	6	1	The way the narrator enunciates, her gentleness with touch.	2	55	1- 10 mins	2		2	1	2	2	2	Grocery check out - the scanning of items and packing into bags	4	3	3	6	3	4	3
43	7		USA	1	2	3	2	1	1	1	2	1	Host is training to give head massage	1	4	4	7	7	1	4	Warm painted walls and massage bed. Head and shoulders of subject getting massage. Arms and hands of person giving massage. Lots of grey soft looking towels.	2	1	6	2	1	4	4	7	3	Calming voice of narrator. I love head massages. I was able to put myself in the place of the subject.	2	28 minutes	I don't know. Triggers overlap		The narrator had a slight European accent. That was very inviting.	2	1	1	1	1	Sounds of brushes again skin and nails	1	2	2	2	2	2	1
43	1		Usa	1	1	1	2	1	1	1	1	2	Host whispers about how things are going outside, and how safe inside.	4	4	1	5	6	2	4	Inside a dark room. But I usually just listen.	2	2	6	4	3	4	4	4	2	Feels one on one, intimate but completely non sexual.	2	30	15	3	Bit of alturistic mood, helping.	2	1	1	2	2	Thunderstorms. Not violent	4	4	4	5	4	2	4
43	7		United States of America	1	1	2	2	2	1	2	2	2	The host is given a wet towel shave and head massage by a real life barber.	3	3	2	6	3	2	2	Just your typical Italian barbershop, with a stylist's chair, a mirror, and a counter with various instruments and products used in an average salon.	3	2	2	2	3	4	7	7	4	One of the triggers that I find most compelling to my experience of ASMR is watching someone receive a massage, particularly involving their head. Watching the host receive an after-shave treatment is particularly powerful to me. This one video I've been focusing on for days has a barber setting a warm towel upon the host's head and squeezing it a few times, applying a couple different creams and…	2	20 minutes.	It's not a trigger video but a session in which a service is being rendered.		The type of video is best described as unintentional ASMR, where the host is going for an ASMR response but by having a service performed that is enjoyed by most anyone for its own sake.	2	2	1	2	1	The video host touched the bark of a tree in her backyard with her fingers.	4	2	2	5	5	2	6
44	7		Ireland	1	1	2	2	1	1	2	1	2	Can be haircut or makeup, or "drawing your face". Also calligraphy, drawing in general.	3	3	1	4	4	2	3	Usually indoors, soft and quiet atmosphere.	2	2	4	4	1	3	4	6	4	Either the personal attention aspect or the ASMRtist's voice.	1	30 mins	N/a - especially for unintentional ASMR			2	1	2	2	1	Drawing/painting masterclass	4	2	2	3	4	2	3
45	7		United States of America	1	1	3	1	1	1	2	1	2	The host plays a good witch that performs healing on you to return your energy to you.	1	1	1	7	6	1	6	It's in a hut in the woods	1	1	7	1	1	6	1	7	1	Her soft talking and hand movements. I also love the personal attention	1	30	10	2
45	7		Canada	1	1	3	1	1	1	1	2	1	The host just rambles on in a soft spoken voice about the items she handles during the video.Boxes, lipstick, bowls, fabric, candles etc..	2	5	2	6	6	2	4	Shot up close, in a bedroom type setting. Sofa behind her I think. I believe she's sitting on the floor.	4	2	7	4	2	6	5	7	4	No audio bumps. Steady sound. The noises she makes are at a comfortable level. Handling items that do not have a high pitched "ting" is a bonus.	4	30	5	1	She has an accent as I am Canadian. Not sure if that makes a difference to the experience or not.	2	1	1	1	2	Person receiving a massage.	4	2	2	6	4	1	4
45	7		USA	1	1	3	1	1	1	1	1	1	clothes pattern on fabric, box of pins, cutting fabric with sharp scissors	1	2	1	7	6	1	3	looks like a tailor shop	3	1	3	1	1	5	4	7	3	the sound of a clothes pattern-the delicate crinkling. Sound of straight pins in a plastic container	2	30-45 iminutes	10 minutes	2	VERY soothing voice with a soft whisper	2	2	2	2	2	walking on small stones	4	6	6	6	6	1	1
45	2		Us	1	1	3	2	1	1	1	1	1	Asmrtist gives viewer makeover	1	5	1	6	6	1	5	There's a wall behind the person	2	1	3	1	1	3	5	7	1	The sounds of the make up, the kind friendliness of the asmrtist, how much she is concentrating.	4	20	1	1	The combination of whispering, sounds, concentration, and attention is exceptional.
50	7		USA	1	2	3	1	2	1	1	2	1	The host is tapping various different objects, crinkling things, etc....	1	5	1	7	6	1	4	It's just a simple room. Not ornate or distracting.	3	2	5	3	1	5	6	7	3	It's simple. There is nothing happening that distracts me from the sounds.	2	60?	4 - 5 mins	1	The host is not trying to be "sexy" in any way. He is appropriately dressed, and gives off an attitude of confidence and trustworthiness, like he is not trying to invade your space or anything. He just wants to help you relax.	1	1	1	2	1	I'm thinking of Bob Ross's videos. He was not an ASMRtist. He is giving a lesson on painting.	1	1	1	7	4	1	3
51	7		United States	1	1	3	1	1	1	2	1	2	The host gives the viewer a facial	2	4	1	6	6	2	4	What one would expect. Soft lighting, neutral colors, accessory items one would expect to find. Staged appropriately	2	1	3	1	1	1	1	7	3	Everything is set to feel safe, welcoming, and comfortable. It follows a predictable script of a familiar experience.	1	45	3 - 5 mins	1	All movement is deliberate, purposeful, and precise. Done with intention. But also gentle, soft, and soothing. Well orchestrated. The host is warm and kind. Looks like they are focused on the viewer and what they are doing	2	1	1	1	1	Cooking breakfast. The focus is on the food and the hands of the host.	1	4	2	6	1	1
51	7		United States	1	1	3	1	2	1	1	2	1	The host does a plastic 3-D puzzle	1	4	2	7	1	4	2	The host uses lighting that focuses mostly on the task at hand, so the background is very dark, the object he's using is well-lit.	4	3	5	2	2	5	6	7	2	I'm not entirely sure, but the combination of the clicking of the plastic pieces he moved around and his slower, more intentional movements worked for me.	2	I don't remember; guessing around 20 - 25 minutes	It's one puzzle, one trigger unless you include movement with sound, then two.								I don't enjoy videos where there isn't a person involved
53	7		USA	1	1	3	1	1	1	1	2	1	Showing and describing rings (jewelry)	1	2	1	7	3	2	3	Hard to tell-close-up of hands	1	1	7	2	1	6	5	7	4	Soothing tone, fluid hand motions, tapping	4	30 minutes	1	1		1	2	2	2	2	Being outside while it's snowing	1	1	6	7	7	1	6
53	7		Denmark	1	1	1	1	1	1	1	1	2	12 step facial sap experience.	2	6	2	6	6	2	4	There is a screen much like a divider in a real spa. Colors are golden / sand. A little art. Asian inspired.	2	2	5	2	1	4	3		3	Artists voice. Artists kind and welcoming demeanor. The particular sounds - several of my favorite triggers are in this video - and the hand movements. Certain hand movements are also a trigger for me.	3	2 days, 10:26:00	5 - 7 min.			2	2	1	2	1	Waves crashing on the shore with accompaning relaxing / meditational music. And bird sounds.	4	3	2	7	7	2	3
53	7		Finland	1	1	2	1	1	1	1	2	2	It's a repeated word video, whispered. I think asmr vocal art would be the best way to discribe it.	2	6	1	6	6	1	4	The host sitting by a table with two microphones and talking/whispering to them, (binaural). Triggers: whispering voice and playing with the word binaurally with different rhyhtms and ways to say it.	2	4	6	3	1	3	5	7	2	Voice. That voice in itself is a trigger for me and the way it is used in that video is just wonderful. And I like the atmosphere, it's relaxed, warm and kind of funny, experimental, creative, artistic and surprising too. For an asmr video it's nicely "normal".	2	20 minutes	20	3	The video maybe? It's Pudding Whispers Repeated Word Check.	1	1	1	2	1	Six different maps, the host is telling about the way they are made and for what purposes, he is not visible, uses a pointer. There is not really any background, maps take the whole screen.	4	4	2	7	1	2	2
54	3		Canada	1	1	1	2	2	1	2	2	2	slo moving tapping on book, wooden surface or box. Very slow movements	3	4	4	4	5	4	4	a worn out desk and a blue book with a zoom recorder	4	4	4	4	4	4	4	4	4	the tapping... only one that consistently delivered. sadly, user has deleted her account	2	45	10	2		2	1	2	2	1	slow movement of game peices	4	4	4	4	4	4	4
54	7		UK	1	2	3	3	1	1	1	2	1	quiet talking with tapping and scratching, using phrases like 'you are safe', you are important, 'this is just for you', crinkle sounds, binural, particularly with gaps - pauses, and sometimes in one ear and sometimes in the other.	4	4	4	4	4	4	4	set in a room - but I havent really paid any attention to the setting.	4	4	4	3	3	4	4	4	3	the sounds and the words used.	1	about 25	5	1	its not so much the video - i usually 'watch' with my eyes closed.	1	1	1	1	1	i'm not sure i have non hosted asmr... so difficult to answer these questions.	4	4	4	4	4	4	4
54	1		U.S.A.	1	2	2	3	1	1	1	2	2	Soft soothing voice and slow hand movements. Hand movements in front of the camera almost as if the hands were touching your face.	2	2	2	7	4	2	3	Night time in small room with relaxing soft lighting.	1	1	7	2	1	3	4	7	4	The gentle hand movements as if having your face caressed and your head massaged. The sound triggers (soft voice and sound of fingers touching face and running through your hair).	2	25 minutes.	20	3	Just very relaxing. Gives me the head tingles and just makes me feel good.	1	1	1	1	1	Ear wax cleaning and ear exam.	4	3	3	2	2	2	2
56	1		USA	1	2	2	1	1	1	1	2	1	The hostess (Bjork) disassembles a TV set while talking about it.	2	4	5	5	3	6	4	A room with a table.	3	3	5	5	3	5	6	6	4	The casual narration; Bjork's voice.	1	4 mins	N/A			2
57	2		US	1	1	1	1	2	1	2	2	1	The host is scrubbing a board in her kitchen using a scrub brush.	1	6	2	7	7	2	2	Kitchen	2	1	6	1	1	3	7	7	4	I just love the sound of scrubbing and the video is very relaxing. I especially enjoy that there is no talking/whispering. It's 15+ minutes long so I can enjoy it for a longer amount of time.	1	15	15	3	No	2	2	2	2	2	Someone sweeping.	4	3	2	7	4	2	6
58	7		England	1	1	2	3	1	1	1	1	2	Young woman with gentle Korean accent applies makeup to the "viewer" The ASMRtist makes soft mouth sounds and nods her head	1	1	1	7	5	2	3	Very bland space, could be interpretted as any relevant room for the purpose of the video	1	1	3	1	1	3	4	7	1	Combination of many personal triggers - mouth soundd, hand and head gestures, tapping, personal attention	4	30	None are focused - they are continual throughout			1	1	1	1	1	Towel folding	4	1	1	6	2	1	4
60	7		uk	1	1	2	1	1	1	1	2	1	Towel folding	2	6	2	6	6	2	4	Room with a table and towels	4	4	4	3	3	3	3	6	1	Soft voice and gentle movement of hands	1	30	30	4	Very simple. Not as keen on complicated role play.	2	1	1	2	1	Gift wrapping	1	3	3	4	3	3	4
60	6	female	USA	1	1	3	2	1	1	1	1	1	packaging dominos as gifts to friends on a cloth covered tabletop. Cutting up colored paper to stuff into boxes, soft spoken.	2	6	4	6	3	3	4	cloth covered tabletop. Cloth is irregular pattern, not smooth. The hands and articles make a sound on the cloth when they touch it. See the hands maneuver the items, looking down from above.	2	3	6	3	2	6	6	7	1	the sound of the dominos clinking, the paper cutting and handling, the tiny box handling, the soft toned speaking, the hands moving on the cloth covered table top.	1	30	?		I don't understand your trigger question above. When I watch this video, I get tingles. Sometimes I'll experience lots of continual waves of them, sometimes just a few. Different every time I watch. I'm guaranteed them if I wait a few months between views. If I have a lot of stress in my mind or if I watch too frequently, I'll receive no tingles.	1	1	1	1	1	Gentlemen's suit fitting	4	2	2	6	3	4	4
65	7		USA	1	1	3	1	1	1	1	1	1	Hostess gives her friend a manicure, as she speaks softly in Korean from time to time.	1	4	1	7	4	3	2	Not much of the setting shows up in the video. It mostly shows the hostess as she holds up nail polish, etc.	1	2	7	1	1	6	4	7	2	For some reason, I find that when people speak, or whisper, in English that I don't experience ASMR. However, I find I don't mind Korean. The faux nail filing in this video really sets me off.	2	28 min.	10	2		2	1	1	1	1	Towels being flattened and folded	4	1	4	7	4	1	3
[truncated: 137 more columns]
